# Supplementary material for: ADAR1 RNA editing regulates endothelial cell functions via the MDA-5 RNA sensing signaling pathway
Source: Life Sci Alliance. 2021 Dec 30;5(3):e202101191. doi: 10.26508/lsa.202101191 (PMC8739526; doi:10.26508/lsa.202101191)
Supplement: Supplementary file 2 [file LSA-2021-01191_TableS2.xlsx]

## Sheet: Sheet1
Ingenuity Canonical Pathways	-log(p-value)	Ratio	z-score	Molecules
Interferon Signaling	7.98	0.222	2.828	IFIT1,IFIT3,IRF1,ISG15,OAS1,PSMB8,STAT2,TAP1
Antigen Presentation Pathway	7.69	0.205	NaN	B2M,HLA-A,HLA-F,PSMB8,PSMB9,TAP1,TAP2,TAPBP
Retinoic acid Mediated Apoptosis Signaling	5.06	0.117	1.134	APAF1,IRF1,PARP12,PARP14,PARP9,RARB,RARG
Cytotoxic T Lymphocyte-mediated Apoptosis of Target Cells	3.11	0.118	NaN	APAF1,B2M,HLA-A,HLA-F
Activation of IRF by Cytosolic Pattern Recognition Receptors	2.97	0.0794	1.342	IFIH1,IFIT2,ISG15,STAT2,ZBP1
Folate Polyglutamylation	2.83	0.4	NaN	FPGS,SHMT1
nNOS Signaling in Neurons	2.58	0.0851	NaN	CAMK4,CAPN7,CAPN9,PRKCB
Superpathway of Serine and Glycine Biosynthesis I	2.52	0.286	NaN	PHGDH,SHMT1
Folate Transformations I	2.29	0.222	NaN	MTHFD2,SHMT1
Death Receptor Signaling	2.26	0.0543	1.342	APAF1,DAXX,PARP12,PARP14,PARP9
Systemic Lupus Erythematosus In B Cell Signaling Pathway	2.15	0.0327	1	CAMK4,IFIH1,IFIT2,IFIT3,ISG15,ISG20,NFATC1,PRKCB,STAT2
Inhibition of Angiogenesis by TSP1	2.08	0.0882	NaN	HSPG2,THBS1,VEGFA
Sumoylation Pathway	2.05	0.0485	NaN	DAXX,ISG20,PML,RHOC,SLC19A1
Huntington's Disease Signaling	2.04	0.0338	-0.816	APAF1,CAPN7,CAPN9,CDK5R1,GLS,HAP1,POLR2B,PRKCB
Nur77 Signaling in T Lymphocytes	2.01	0.0588	-2	APAF1,CAMK4,NFATC1,PRKCB
Phagosome Maturation	1.96	0.0397	NaN	B2M,CTSB,HLA-A,HLA-F,TAP1,TUBA8
Inhibition of Matrix Metalloproteases	1.92	0.0769	NaN	HSPG2,MMP19,TIMP3
Lipoate Salvage and Modification	1.91	1	NaN	LIPT1
Caveolar-mediated Endocytosis Signaling	1.9	0.0548	NaN	B2M,COPG2,HLA-A,HLA-F
Pyrimidine Ribonucleotides Interconversion	1.83	0.0714	NaN	CMPK2,DDX3X,ZRANB3
Role of PKR in Interferon Induction and Antiviral Response	1.82	0.0424	1.342	APAF1,FCGR1A,IFIH1,IRF1,STAT2
Role of Macrophages, Fibroblasts and Endothelial Cells in Rheumatoid Arthritis	1.8	0.0288	NaN	ADAMTS4,APC2,CAMK4,CEBPB,CSF1,FCGR1A,NFATC1,PRKCB,VEGFA
Granzyme B Signaling	1.79	0.125	NaN	APAF1,NUMA1
Pyrimidine Ribonucleotides De Novo Biosynthesis	1.78	0.0682	NaN	CMPK2,DDX3X,ZRANB3
Th1 Pathway	1.77	0.0413	1	CD274,HLA-A,IL27,IRF1,NFATC1
Coronavirus Replication Pathway	1.75	0.0667	NaN	COPG2,TMPRSS2,TUBA8
PFKFB4 Signaling Pathway	1.73	0.0652	NaN	HK2,PFKFB4,XDH
Osteoarthritis Pathway	1.71	0.0318	0.816	ADAMTS4,ANXA5,CEBPB,H19,MYBBP1A,TIMP3,VEGFA
Protein Ubiquitination Pathway	1.7	0.0293	NaN	B2M,HLA-A,HLA-F,HSPB8,PSMB8,PSMB9,TAP1,TAP2
T Cell Exhaustion Signaling Pathway	1.67	0.0343	1	CD274,HLA-A,HLA-F,NFATC1,STAT2,VEGFA
Tumor Microenvironment Pathway	1.66	0.0341	0	CD274,CSF1,HLA-A,HLA-F,MMP19,VEGFA
Amyloid Processing	1.63	0.06	NaN	CAPN7,CAPN9,CDK5R1
Lipoate Biosynthesis and Incorporation II	1.61	0.5	NaN	LIPT1
Glycine Biosynthesis I	1.61	0.5	NaN	SHMT1
Glutamine Degradation I	1.61	0.5	NaN	GLS
Inflammasome pathway	1.61	0.1	NaN	AIM2,CTSB
Dendritic Cell Maturation	1.58	0.0326	2.236	B2M,FCGR1A,HLA-A,HLA-F,IL23A,STAT2
Communication between Innate and Adaptive Immune Cells	1.51	0.0417	NaN	B2M,CXCL10,HLA-A,HLA-F
Amyotrophic Lateral Sclerosis Signaling	1.5	0.0412	-1	APAF1,CAPN7,CAPN9,VEGFA
Bladder Cancer Signaling	1.5	0.0412	NaN	MMP19,RASSF1,THBS1,VEGFA
p53 Signaling	1.49	0.0408	1	APAF1,PLAGL1,PML,THBS1
5-aminoimidazole Ribonucleotide Biosynthesis I	1.44	0.333	NaN	PPAT
Virus Entry via Endocytic Pathways	1.43	0.0392	NaN	B2M,HLA-A,HLA-F,PRKCB
Role of Pattern Recognition Receptors in Recognition of Bacteria and Viruses	1.38	0.0325	NaN	IFIH1,OAS1,Oas1h,OAS3,PRKCB
PD-1, PD-L1 cancer immunotherapy pathway	1.38	0.0377	-1	B2M,CD274,HLA-A,HLA-F
eNOS Signaling	1.33	0.0314	-0.447	CAMK4,CHRNA2,CHRNB2,PRKCB,VEGFA
Calcium-induced T Lymphocyte Apoptosis	1.32	0.0455	NaN	CAMK4,HLA-A,PRKCB
Eicosanoid Signaling	1.32	0.0455	NaN	LTA4H,PTGER2,TBXAS1
Type I Diabetes Mellitus Signaling	1.32	0.036	NaN	APAF1,HLA-A,HLA-F,IRF1
