# Supplementary material for: ADAR1 RNA editing regulates endothelial cell functions via the MDA-5 RNA sensing signaling pathway
Source: Life Sci Alliance. 2021 Dec 30;5(3):e202101191. doi: 10.26508/lsa.202101191 (PMC8739526; doi:10.26508/lsa.202101191)
Supplement: Supplementary file 3 [file LSA-2021-01191_TableS3.xlsx]

## Sheet: select.WTgreaterKO.SINE.RRcount
Edited SINE ID	# Editing sites	Chr	Start	End	Name	Family	EC1.CON.altRate	EC1.TM.altRate	EC2.CON.altRate	EC2.TM.altRate	Site #: EC1.CON	Site #: EC1.TM	Site #: EC2.CON	Site #: EC2.TM
chr4__56870118__56870305__SINE__B2_Mm1t__B2	38	chr4	56870118	56870305	B2_Mm1t	B2	0.0906185	0.027777	0.137854	0.0300366	17	6	21	8
chr11__82962556__82962680__SINE__B1_Mus2__Alu	28	chr11	82962556	82962680	B1_Mus2	Alu	0.164736	0.0497512	0.2062	0.0708662	14	7	14	8
chr11__82963187__82963333__SINE__B1_Mus1__Alu	28	chr11	82963187	82963333	B1_Mus1	Alu	0.0888303	0.0353326	0.0834841	0.0393951	14	9	14	8
chr2__126892815__126892950__SINE__B1_Mus2__Alu	27	chr2	126892815	126892950	B1_Mus2	Alu	0.1999	0.0493671	0.192277	0.0460464	15	5	12	6
chr4__56875682__56875875__SINE__B2_Mm1a__B2	26	chr4	56875682	56875875	B2_Mm1a	B2	0.0570249	0.0030919	0.0645238	0.0321351	9	0	17	4
chr16__32300213__32300378__SINE__B2_Mm1t__B2	24	chr16	32300213	32300378	B2_Mm1t	B2	0.139423	0.0729129	0.219065	0.134075	7	5	17	11
chr17__6122569__6122713__SINE__B1_Mur2__Alu	24	chr17	6122569	6122713	B1_Mur2	Alu	0.145916	0.082364	0.228867	0.111594	10	6	14	10
chr17__6123011__6123138__SINE__B1_Mur2__Alu	24	chr17	6123011	6123138	B1_Mur2	Alu	0.11275	0.066471	0.169001	0.0887938	12	7	12	8
chr16__32299771__32299971__SINE__B2_Mm2__B2	22	chr16	32299771	32299971	B2_Mm2	B2	0.151261	0.0259592	0.165656	0.0756068	9	0	13	5
chr2__120601744__120601891__SINE__B1_Mur4__Alu	22	chr2	120601744	120601891	B1_Mur4	Alu	0.198088	0.0485522	0.224665	0.205412	11	1	11	9
chr8__124894070__124894210__SINE__B1_Mm__Alu	21	chr8	124894070	124894210	B1_Mm	Alu	0.10763	0.0333159	0.134001	0.0615151	10	3	11	8
chr2__120600811__120600960__SINE__B1_Mus2__Alu	20	chr2	120600811	120600960	B1_Mus2	Alu	0.0660666	0.0172658	0.0486781	0.0354538	12	0	8	6
chr18__32102496__32102626__SINE__B1_Mur1__Alu	18	chr18	32102496	32102626	B1_Mur1	Alu	0.0923796	0.0259494	0.110516	0.0430998	11	2	7	6
chrX__150984487__150984635__SINE__B1_Mus1__Alu	18	chrX	150984487	150984635	B1_Mus1	Alu	0.0841215	0.0288017	0.117619	0.0254207	9	4	9	3
chrX__150985400__150985536__SINE__B1_Mur3__Alu	18	chrX	150985400	150985536	B1_Mur3	Alu	0.0742955	0.028979	0.10692	0.0357867	9	5	9	8
chr12__17429769__17429913__SINE__B1_Mur3__Alu	16	chr12	17429769	17429913	B1_Mur3	Alu	0.0576464	0.0378625	0.0661959	0.0331294	8	5	8	6
chr2__104829411__104829546__SINE__B1_Mus1__Alu	16	chr2	104829411	104829546	B1_Mus1	Alu	0.0639369	0.0169885	0.104352	0.0325208	7	1	9	3
chr4__155621031__155621168__SINE__B1_Mus1__Alu	16	chr4	155621031	155621168	B1_Mus1	Alu	0.067441	0.0300201	0.0870817	0.0157554	7	4	9	2
chr7__79924438__79924571__SINE__B1_Mm__Alu	16	chr7	79924438	79924571	B1_Mm	Alu	0.227498	0.0833333	0.356298	0.236111	6	0	10	3
chr8__124893787__124893936__SINE__B1_Mus2__Alu	16	chr8	124893787	124893936	B1_Mus2	Alu	0.0840154	0.0327441	0.126043	0.0441131	7	5	9	7
chr15__79907479__79907625__SINE__B1_Mur2__Alu	15	chr15	79907479	79907625	B1_Mur2	Alu	0.0757635	0.0587168	0.082971	0.0572106	7	5	8	5
chr4__155621885__155622031__SINE__B1_Mur3__Alu	15	chr4	155621885	155622031	B1_Mur3	Alu	0.113196	0.0420549	0.184235	0.0322151	6	4	9	3
chr4__155622256__155622402__SINE__B1_Mus1__Alu	15	chr4	155622256	155622402	B1_Mus1	Alu	0.092125	0.0251199	0.11127	0.033727	7	1	8	4
chr4__116552749__116552945__SINE__B2_Mm2__B2	14	chr4	116552749	116552945	B2_Mm2	B2	0.197537	0.0307971	0.29244	0.108861	5	2	9	7
chr9__96056044__96056191__SINE__B1_Mus2__Alu	14	chr9	96056044	96056191	B1_Mus2	Alu	0.0723997	0.0171858	0.0779221	0.0221216	7	3	7	4
chr1__71635429__71635566__SINE__B1_Mm__Alu	13	chr1	71635429	71635566	B1_Mm	Alu	0.0832671	0.0456552	0.0853198	0.0556745	6	3	7	5
chr11__59456113__59456298__SINE__B2_Mm2__B2	13	chr11	59456113	59456298	B2_Mm2	B2	0.12901	0.0282805	0.221883	0.0638369	5	0	8	0
chr12__54671664__54671776__SINE__B2_Mm2__B2	13	chr12	54671664	54671776	B2_Mm2	B2	0.0676519	0.0407151	0.0547554	0.0196256	7	2	6	2
chr7__55977578__55977700__SINE__B1_Mus2__Alu	13	chr7	55977578	55977700	B1_Mus2	Alu	0.105057	0.020757	0.119346	0.0223701	5	0	8	2
chr10__58411480__58411675__SINE__B3__B2	12	chr10	58411480	58411675	B3	B2	0.15384	0.11893	0.162697	0.0979362	6	5	6	5
chr11__70643706__70643842__SINE__B1_Mus2__Alu	12	chr11	70643706	70643842	B1_Mus2	Alu	0.0818492	0.0697875	0.180515	0.0502344	4	3	8	2
chr19__21680247__21680394__SINE__B1_Mus2__Alu	12	chr19	21680247	21680394	B1_Mus2	Alu	0.0594597	0.0167725	0.0744303	0.0190065	6	0	6	0
chr19__40740922__40741051__SINE__B1_Mus2__Alu	12	chr19	40740922	40741051	B1_Mus2	Alu	0.0634411	0.0316137	0.0728132	0.0378717	6	1	6	4
chr8__72480106__72480195__SINE__B1_Mus2__Alu	12	chr8	72480106	72480195	B1_Mus2	Alu	0.0904648	0.0755245	0.103101	0.0324886	5	2	7	3
chr8__94016603__94016740__SINE__B1_Mur3__Alu	12	chr8	94016603	94016740	B1_Mur3	Alu	0.0548392	0.0327223	0.0530125	0.021673	6	3	6	4
chr9__22241202__22241389__SINE__B2_Mm2__B2	12	chr9	22241202	22241389	B2_Mm2	B2	0.0752825	0.0432217	0.146393	0.0670078	3	1	9	6
chr1__13624847__13625041__SINE__B2_Mm2__B2	11	chr1	13624847	13625041	B2_Mm2	B2	0.150499	0.0801776	0.213176	0.0723212	5	4	6	4
chr11__4141988__4142125__SINE__B1_Mur3__Alu	11	chr11	4141988	4142125	B1_Mur3	Alu	0.0505379	0.017671	0.0876124	0.0211813	3	0	8	2
chr11__59458287__59458460__SINE__B2_Mm2__B2	11	chr11	59458287	59458460	B2_Mm2	B2	0.163888	0.0531337	0.151441	0.0485678	7	0	4	0
chr11__70643392__70643535__SINE__B1_Mus1__Alu	11	chr11	70643392	70643535	B1_Mus1	Alu	0.137593	0.05	0.173086	0.0587375	5	2	6	2
chr12__70995060__70995233__SINE__B3__B2	11	chr12	70995060	70995233	B3	B2	0.120008	0.0256144	0.181784	0.0478646	4	1	7	4
chr17__24176424__24176537__SINE__B1_Mus2__Alu	11	chr17	24176424	24176537	B1_Mus2	Alu	0.105811	0.0497468	0.0666837	0.0232118	6	3	5	3
chr19__46595144__46595280__SINE__B1_Mus1__Alu	11	chr19	46595144	46595280	B1_Mus1	Alu	0.034815	0.00950218	0.0699615	0.024731	4	1	7	3
chr2__120736882__120737027__SINE__B1_Mus2__Alu	11	chr2	120736882	120737027	B1_Mus2	Alu	0.118959	0.0606208	0.108452	0.0980603	5	3	6	3
chr2__181517780__181517907__SINE__B1_Mur3__Alu	11	chr2	181517780	181517907	B1_Mur3	Alu	0.123497	0.034957	0.128471	0.0356439	6	0	5	1
chr3__116744573__116744721__SINE__B1_Mur4__Alu	11	chr3	116744573	116744721	B1_Mur4	Alu	0.112623	0.0458438	0.0697243	0.0268829	5	2	6	2
chr4__21834685__21834843__SINE__B1_Mus1__Alu	11	chr4	21834685	21834843	B1_Mus1	Alu	0.153686	0.0895559	0.130484	0.0518042	6	5	5	4
chr7__127526647__127526781__SINE__B1_Mur2__Alu	11	chr7	127526647	127526781	B1_Mur2	Alu	0.106276	0.0412918	0.126158	0.0535781	5	1	6	3
chr7__19139708__19139855__SINE__B1_Mur4__Alu	11	chr7	19139708	19139855	B1_Mur4	Alu	0.0810646	0.0469922	0.0915355	0.0594748	5	4	6	5
chr9__96057124__96057272__SINE__B1_Mur4__Alu	11	chr9	96057124	96057272	B1_Mur4	Alu	0.0954543	0.0225643	0.142938	0.0265723	4	2	7	5
chr15__79908632__79908779__SINE__B1_Mus1__Alu	10	chr15	79908632	79908779	B1_Mus1	Alu	0.0329954	0.0161069	0.0287426	0.0246272	5	2	5	4
chr15__9199458__9199587__SINE__ID_B1__B4	10	chr15	9199458	9199587	ID_B1	B4	0.0722489	0.0301389	0.0819966	0.0230354	4	2	6	2
chr17__33928470__33928618__SINE__B1_Mus1__Alu	10	chr17	33928470	33928618	B1_Mus1	Alu	0.0721601	0.0181395	0.0725833	0.0276227	6	2	4	2
chr2__132309841__132309931__SINE__MIRb__MIR	10	chr2	132309841	132309931	MIRb	MIR	0.0871255	0.0262711	0.100057	0.0280013	5	3	5	3
chr3__101921711__101921851__SINE__B1_Mus1__Alu	10	chr3	101921711	101921851	B1_Mus1	Alu	0.0772109	0.0152882	0.120334	0.0537106	3	0	7	4
chr5__142669219__142669352__SINE__B1F1__Alu	10	chr5	142669219	142669352	B1F1	Alu	0.0446558	0.0187979	0.060768	0.0236978	5	2	5	3
chr8__72478688__72478794__SINE__RSINE1__B4	10	chr8	72478688	72478794	RSINE1	B4	0.0626393	0.0125997	0.0686291	0.0196613	5	1	5	2
chrX__150983754__150983892__SINE__B1_Mus2__Alu	10	chrX	150983754	150983892	B1_Mus2	Alu	0.130654	0.0871263	0.111913	0.0928991	5	1	5	2
chr10__128799335__128799486__SINE__B1_Mur2__Alu	9	chr10	128799335	128799486	B1_Mur2	Alu	0.0453905	0.00911242	0.0598269	0.0510309	4	0	5	4
chr11__68985891__68986000__SINE__B1_Mur1__Alu	9	chr11	68985891	68986000	B1_Mur1	Alu	0.0598259	0.00992831	0.0963222	0.0127582	4	1	5	2
chr12__91638537__91638681__SINE__B1_Mus1__Alu	9	chr12	91638537	91638681	B1_Mus1	Alu	0.0229125	0.00496158	0.0196552	0.0127076	5	0	4	0
chr16__32988603__32988736__SINE__B1F__Alu	9	chr16	32988603	32988736	B1F	Alu	0.0980595	0.0662935	0.194692	0.068935	4	3	5	3
chr17__24177694__24177833__SINE__B1F2__Alu	9	chr17	24177694	24177833	B1F2	Alu	0.0634745	0.0249876	0.0716442	0.0389894	3	1	6	3
chr2__104831239__104831443__SINE__B4A__B4	9	chr2	104831239	104831443	B4A	B4	0.0487886	0.0117924	0.0487263	0.020226	5	0	4	0
chr2__120733724__120733868__SINE__B1_Mur3__Alu	9	chr2	120733724	120733868	B1_Mur3	Alu	0.0860511	0.0533531	0.134119	0.045516	4	1	5	2
chr4__21834526__21834641__SINE__PB1D9__Alu	9	chr4	21834526	21834641	PB1D9	Alu	0.162752	0.0533911	0.117572	0.0378151	5	0	4	1
chr8__104424214__104424356__SINE__B1_Mus1__Alu	9	chr8	104424214	104424356	B1_Mus1	Alu	0.179243	0.0970258	0.129025	0.103152	5	2	4	2
chr8__70870619__70870786__SINE__B2_Mm2__B2	9	chr8	70870619	70870786	B2_Mm2	B2	0.166667	0.145833	0.249242	0.124611	1	0	8	2
chr1__10030907__10031054__SINE__B1_Mus1__Alu	8	chr1	10030907	10031054	B1_Mus1	Alu	0.156913	0.031562	0.0524691	0.00992063	7	1	1	0
chr1__143755597__143755704__SINE__B1_Mm__Alu	8	chr1	143755597	143755704	B1_Mm	Alu	0.0524253	0.0127783	0.0604717	0.00477431	3	0	5	0
chr1__143755709__143755849__SINE__B1_Mur1__Alu	8	chr1	143755709	143755849	B1_Mur1	Alu	0.0499424	0.00967434	0.0549861	0.0158327	4	1	4	0
chr10__91097634__91097754__SINE__PB1D9__Alu	8	chr10	91097634	91097754	PB1D9	Alu	0.0405767	0.0150916	0.0810992	0.0249461	4	1	4	2
chr11__68986823__68986971__SINE__B1_Mus2__Alu	8	chr11	68986823	68986971	B1_Mus2	Alu	0.062431	0.00490195	0.0585491	0.019454	4	0	4	2
chr16__11143642__11143786__SINE__B1_Mus1__Alu	8	chr16	11143642	11143786	B1_Mus1	Alu	0.153664	0.0970437	0.210038	0.122607	4	2	4	3
chr19__40742448__40742589__SINE__B1_Mur2__Alu	8	chr19	40742448	40742589	B1_Mur2	Alu	0.223574	0.05	0.19719	0.122692	3	0	5	4
chr19__46066199__46066344__SINE__B1_Mus1__Alu	8	chr19	46066199	46066344	B1_Mus1	Alu	0.232605	0.0494255	0.162005	0.0266143	5	2	3	1
chr5__142870026__142870150__SINE__B1_Mur1__Alu	8	chr5	142870026	142870150	B1_Mur1	Alu	0.163967	0.118431	0.172093	0.090581	4	3	4	3
chr8__123150504__123150648__SINE__B1_Mus1__Alu	8	chr8	123150504	123150648	B1_Mus1	Alu	0.23165	0.143254	0.275314	0.111111	4	1	4	0
chr8__72480210__72480364__SINE__RSINE1__B4	8	chr8	72480210	72480364	RSINE1	B4	0.0407044	0.0277778	0.0747256	0.0469495	1	0	7	2
chr9__21682972__21683145__SINE__B3__B2	8	chr9	21682972	21683145	B3	B2	0.075316	0.0244097	0.0652321	0.0252829	4	2	4	3
chr9__44294803__44294990__SINE__B2_Mm2__B2	8	chr9	44294803	44294990	B2_Mm2	B2	0.0613637	0.0104348	0.0438326	0.00454545	4	0	4	0
chr1__86345832__86345962__SINE__B1_Mur2__Alu	7	chr1	86345832	86345962	B1_Mur2	Alu	0.0872339	0.0460665	0.0903119	0.0332982	4	2	3	2
chr1__86347693__86347827__SINE__B1_Mus1__Alu	7	chr1	86347693	86347827	B1_Mus1	Alu	0.0296585	0.00929731	0.0681827	0.0245621	2	1	5	2
chr10__58410679__58410882__SINE__B3__B2	7	chr10	58410679	58410882	B3	B2	0.046201	0.0446847	0.0565655	0.0388889	3	2	4	2
chr11__68952798__68952944__SINE__B1_Mur3__Alu	7	chr11	68952798	68952944	B1_Mur3	Alu	0.161788	0.118012	0.192624	0.108453	3	1	4	2
chr11__77415340__77415533__SINE__B3__B2	7	chr11	77415340	77415533	B3	B2	0.0996252	0.0882865	0.15896	0.0418932	3	2	4	2
chr11__82963629__82963747__SINE__B1_Mur1__Alu	7	chr11	82963629	82963747	B1_Mur1	Alu	0.0218292	0.00622056	0.0202382	0.00730111	4	0	3	1
chr13__100701315__100701459__SINE__B1_Mus2__Alu	7	chr13	100701315	100701459	B1_Mus2	Alu	0.0913409	0.0183333	0.144225	0.0358333	3	0	4	0
chr13__106831463__106831602__SINE__B1_Mus1__Alu	7	chr13	106831463	106831602	B1_Mus1	Alu	0.0844341	0.0286247	0.132856	0.0525803	3	2	4	2
chr15__39014064__39014244__SINE__B3__B2	7	chr15	39014064	39014244	B3	B2	0.177106	0.109357	0.118788	0.0858986	4	2	3	1
chr17__56175745__56175928__SINE__B2_Mm2__B2	7	chr17	56175745	56175928	B2_Mm2	B2	0.0731094	0.0227642	0.0591991	0.0254255	3	2	4	2
chr18__32102844__32102989__SINE__B1_Mm__Alu	7	chr18	32102844	32102989	B1_Mm	Alu	0.0553987	0.0401289	0.100475	0.0298499	1	0	6	2
chr2__126891430__126891545__SINE__B1_Mus2__Alu	7	chr2	126891430	126891545	B1_Mus2	Alu	0.0785256	0.0778968	0.276827	0.0323004	1	0	6	0
chr2__130554873__130555012__SINE__B1_Mur1__Alu	7	chr2	130554873	130555012	B1_Mur1	Alu	0.15765	0.125151	0.199613	0.0933929	3	1	4	2
chr2__153618323__153618416__SINE__B2_Mm1t__B2	7	chr2	153618323	153618416	B2_Mm1t	B2	0.083157	0.0361552	0.093254	0.0106789	3	0	4	0
chr3__101921022__101921169__SINE__B1_Mm__Alu	7	chr3	101921022	101921169	B1_Mm	Alu	0.143983	0.008547	0.156792	0.0492987	4	0	3	0
chr3__96625758__96625894__SINE__B1_Mus1__Alu	7	chr3	96625758	96625894	B1_Mus1	Alu	0.0808412	0.0294248	0.0873413	0.0284913	4	1	3	1
chr8__72223782__72223932__SINE__B1_Mus2__Alu	7	chr8	72223782	72223932	B1_Mus2	Alu	0.0452296	0.0211758	0.0504597	0.0289262	3	2	4	3
chr9__54947188__54947331__SINE__B1_Mus1__Alu	7	chr9	54947188	54947331	B1_Mus1	Alu	0.183479	0.0533334	0.23255	0.131136	3	0	4	2
chr9__66373536__66373742__SINE__B3__B2	7	chr9	66373536	66373742	B3	B2	0.148135	0.0300288	0.164438	0.0443654	3	0	4	2
chr1__13625690__13625897__SINE__B3__B2	6	chr1	13625690	13625897	B3	B2	0.0530299	0.0424567	0.102254	0.0399896	2	1	4	2
chr1__168378108__168378327__SINE__MIRb__MIR	6	chr1	168378108	168378327	MIRb	MIR	0.491622	0.416667	0.545455	0.394444	3	1	3	2
chr11__53263843__53263988__SINE__B1_Mm__Alu	6	chr11	53263843	53263988	B1_Mm	Alu	0.0860067	0.0655491	0.100177	0.072619	3	1	3	2
chr11__82963434__82963546__SINE__B1_Mur4__Alu	6	chr11	82963434	82963546	B1_Mur4	Alu	0.0155125	0.00338294	0.0183919	0.00627912	3	0	3	0
chr14__52294191__52294299__SINE__PB1D9__Alu	6	chr14	52294191	52294299	PB1D9	Alu	0.0721684	0.00953809	0.0776522	0.0570804	3	1	3	2
chr15__55254837__55254979__SINE__B1_Mus1__Alu	6	chr15	55254837	55254979	B1_Mus1	Alu	0.164935	0.0267857	0.111111	0.0102041	2	0	4	0
chr17__24178232__24178369__SINE__B1_Mur4__Alu	6	chr17	24178232	24178369	B1_Mur4	Alu	0.13092	0.0500897	0.136784	0.0837718	2	0	4	2
chr17__32818766__32818913__SINE__B1_Mus2__Alu	6	chr17	32818766	32818913	B1_Mus2	Alu	0.0297752	0.00462963	0.0932403	0.00347222	1	0	5	0
chr18__35225102__35225243__SINE__B1_Mur2__Alu	6	chr18	35225102	35225243	B1_Mur2	Alu	0.174038	0.106251	0.22	0.127273	3	2	3	1
chr18__35674257__35674391__SINE__B1_Mur1__Alu	6	chr18	35674257	35674391	B1_Mur1	Alu	0.0300723	0.00499025	0.0401731	0.0163877	3	0	3	1
chr18__36312687__36312828__SINE__B1_Mus2__Alu	6	chr18	36312687	36312828	B1_Mus2	Alu	0.320702	0.28125	0.502976	0.145089	4	0	2	0
chr19__46060723__46060857__SINE__B1_Mur4__Alu	6	chr19	46060723	46060857	B1_Mur4	Alu	0.060606	0.0192157	0.144627	0.0393686	2	0	4	0
chr2__104680649__104680795__SINE__B1_Mus2__Alu	6	chr2	104680649	104680795	B1_Mus2	Alu	0.0445225	0.00737328	0.0402022	0.00741162	4	0	2	0
chr2__121492783__121492924__SINE__B1_Mus1__Alu	6	chr2	121492783	121492924	B1_Mus1	Alu	0.290295	0	0.118586	0.0210796	4	0	2	0
chr2__163627085__163627203__SINE__B2_Mm2__B2	6	chr2	163627085	163627203	B2_Mm2	B2	0.0193829	0.00667497	0.0473025	0.00637858	1	0	5	0
chr2__36254880__36255008__SINE__B1_Mur3__Alu	6	chr2	36254880	36255008	B1_Mur3	Alu	0.266349	0.0644445	0.279589	0.0657794	3	1	3	1
chr4__129181135__129181277__SINE__B1_Mus2__Alu	6	chr4	129181135	129181277	B1_Mus2	Alu	0.381905	0.14386	0.428571	0.146667	3	1	3	1
chr4__129529484__129529616__SINE__B1_Mur3__Alu	6	chr4	129529484	129529616	B1_Mur3	Alu	0.0575465	0.0179272	0.110317	0.0657451	1	0	5	2
chr4__155620813__155620973__SINE__B3A__B2	6	chr4	155620813	155620973	B3A	B2	0.0503957	0.0046083	0.0981012	0.0207425	2	0	4	1
chr6__47871299__47871485__SINE__B3__B2	6	chr6	47871299	47871485	B3	B2	0.113162	0.0229167	0.0619369	0.0262962	4	0	2	0
chr8__123149671__123149815__SINE__B1_Mur2__Alu	6	chr8	123149671	123149815	B1_Mur2	Alu	0.131907	0.100433	0.128347	0.0698052	4	1	2	1
chr9__108336235__108336357__SINE__B1_Mus2__Alu	6	chr9	108336235	108336357	B1_Mus2	Alu	0.21345	0.165812	0.223359	0.108225	3	1	3	2
chr1__133137524__133137600__SINE__ID4___ID	5	chr1	133137524	133137600	ID4	_ID	0.0364807	0.0138426	0.0350685	0.0109589	2	0	3	0
chr1__4849098__4849244__SINE__B1_Mus1__Alu	5	chr1	4849098	4849244	B1_Mus1	Alu	0.348809	0	0.233333	0.0416667	3	0	2	0
chr10__86837210__86837359__SINE__B1_Mur1__Alu	5	chr10	86837210	86837359	B1_Mur1	Alu	0.0368902	0.027758	0.0488053	0.0356287	2	1	3	2
chr11__70032640__70032758__SINE__PB1D10__Alu	5	chr11	70032640	70032758	PB1D10	Alu	0.0814529	0	0.0569757	0.0460705	3	0	2	1
chr12__100835846__100835987__SINE__B1_Mur1__Alu	5	chr12	100835846	100835987	B1_Mur1	Alu	0.368055	0.225	0.270833	0.25	3	0	2	0
chr13__103006202__103006336__SINE__B1_Mur1__Alu	5	chr13	103006202	103006336	B1_Mur1	Alu	0.0756486	0.0496261	0.0616443	0.0406473	3	2	2	1
chr14__21796737__21796884__SINE__B1_Mus2__Alu	5	chr14	21796737	21796884	B1_Mus2	Alu	0.104655	0.0084983	0.13948	0.0820553	2	1	3	2
chr17__33689794__33690008__SINE__B3__B2	5	chr17	33689794	33690008	B3	B2	0.117023	0.043287	0.0726588	0.0378788	3	0	2	1
chr17__33928645__33928793__SINE__B1_Mur1__Alu	5	chr17	33928645	33928793	B1_Mur1	Alu	0.0194368	0.00612225	0.0219696	0.00616935	3	1	2	1
chr17__35857717__35857826__SINE__PB1D9__Alu	5	chr17	35857717	35857826	PB1D9	Alu	0.0306663	0.0111886	0.0506867	0.0264995	2	1	3	2
chr18__35602514__35602691__SINE__B2_Mm2__B2	5	chr18	35602514	35602691	B2_Mm2	B2	0.040144	0.00982662	0.0787037	0.0669829	2	0	3	1
chr18__35672874__35673021__SINE__B1_Mus2__Alu	5	chr18	35672874	35673021	B1_Mus2	Alu	0.0373141	0.00620173	0.0398175	0.0135684	2	0	3	1
chr18__35777876__35778026__SINE__B1_Mm__Alu	5	chr18	35777876	35778026	B1_Mm	Alu	0.0501422	0.0233317	0.0691736	0.00936682	2	1	3	1
chr19__21680506__21680643__SINE__B1_Mus1__Alu	5	chr19	21680506	21680643	B1_Mus1	Alu	0.0731152	0.0536836	0.0427273	0.0416667	3	2	2	0
chr2__120594476__120594615__SINE__B1_Mur2__Alu	5	chr2	120594476	120594615	B1_Mur2	Alu	0.0196923	0.0155385	0.135043	0	1	0	4	0
chr2__144540413__144540519__SINE__PB1D9__Alu	5	chr2	144540413	144540519	PB1D9	Alu	0.0343965	0.0231001	0.0356196	0.00931723	3	1	2	1
chr2__37425821__37425964__SINE__B1F2__Alu	5	chr2	37425821	37425964	B1F2	Alu	0.0179	0.00581269	0.0253849	0.0135388	2	0	3	1
chr3__105738067__105738242__SINE__B3__B2	5	chr3	105738067	105738242	B3	B2	0.299297	0.186364	0.27381	0.0803661	4	2	1	0
chr3__16195807__16195952__SINE__B2_Mm2__B2	5	chr3	16195807	16195952	B2_Mm2	B2	0.0465151	0.00879014	0.0400073	0.0173795	3	0	2	1
chr3__90060536__90060648__SINE__PB1D10__Alu	5	chr3	90060536	90060648	PB1D10	Alu	0.197051	0.125	0.297368	0.138177	3	1	2	1
chr3__95679206__95679349__SINE__B1_Mur3__Alu	5	chr3	95679206	95679349	B1_Mur3	Alu	0.137255	0.0320513	0.356667	0.0502331	2	0	3	0
chr3__96632645__96632745__SINE__PB1D9__Alu	5	chr3	96632645	96632745	PB1D9	Alu	0.119182	0.0256716	0.114377	0.0536975	2	1	3	2
chr4__118478207__118478269__SINE__B1_Mur4__Alu	5	chr4	118478207	118478269	B1_Mur4	Alu	0.0678639	0.0497685	0.100426	0.0492308	2	1	3	1
chr4__118626752__118626889__SINE__B1_Mur4__Alu	5	chr4	118626752	118626889	B1_Mur4	Alu	0.0590619	0.0302804	0.101896	0.0418908	2	0	3	2
chr4__149118725__149118873__SINE__B1_Mm__Alu	5	chr4	149118725	149118873	B1_Mm	Alu	0.0292157	0.025	0.189697	0.0281685	1	0	4	0
chr5__33415309__33415454__SINE__B1_Mus2__Alu	5	chr5	33415309	33415454	B1_Mus2	Alu	0.0314742	0.00529827	0.0766542	0.0200675	2	0	3	1
chr7__39567594__39567739__SINE__B1_Mur3__Alu	5	chr7	39567594	39567739	B1_Mur3	Alu	0.0153813	0.00565476	0.042357	0.019902	1	0	4	2
chr8__110972522__110972632__SINE__PB1D7__Alu	5	chr8	110972522	110972632	PB1D7	Alu	0.0585813	0.0367889	0.0726042	0.0138647	2	1	3	0
chr8__111552364__111552575__SINE__B3__B2	5	chr8	111552364	111552575	B3	B2	0.100662	0.0824576	0.0853776	0.0669768	3	1	2	1
chr8__124047769__124047887__SINE__PB1D9__Alu	5	chr8	124047769	124047887	PB1D9	Alu	0.0589123	0.0223106	0.0774503	0.0240517	2	1	3	1
chr8__83738623__83738817__SINE__B3__B2	5	chr8	83738623	83738817	B3	B2	0.100849	0	0.152607	0.111111	3	0	2	0
chr9__72673193__72673321__SINE__B1_Mus1__Alu	5	chr9	72673193	72673321	B1_Mus1	Alu	0.141536	0.0738636	0.240079	0.0587453	2	1	3	1
chr9__72727319__72727500__SINE__B2_Mm2__B2	5	chr9	72727319	72727500	B2_Mm2	B2	0.0521451	0.0279806	0.045096	0.0204545	2	1	3	2
chr1__156427485__156427639__SINE__B1_Mur4__Alu	4	chr1	156427485	156427639	B1_Mur4	Alu	0.0498052	0	0.114906	0.0402455	1	0	3	1
chr1__156429140__156429285__SINE__B1_Mus1__Alu	4	chr1	156429140	156429285	B1_Mus1	Alu	0.0526876	0.0489058	0.0577496	0.0443199	2	1	2	1
chr1__168337592__168337880__SINE__B4A__B4	4	chr1	168337592	168337880	B4A	B4	0.433087	0.088889	0.315476	0	2	1	2	0
chr1__74581919__74582113__SINE__B2_Mm1t__B2	4	chr1	74581919	74582113	B2_Mm1t	B2	0.111111	0.0138889	0.202116	0.164815	1	0	3	0
chr10__58463500__58463638__SINE__B1_Mus2__Alu	4	chr10	58463500	58463638	B1_Mus2	Alu	0.197661	0.076923	0.277778	0.0692983	2	1	2	1
chr10__88783788__88783927__SINE__B1_Mus2__Alu	4	chr10	88783788	88783927	B1_Mus2	Alu	0.6	0.208333	0.433333	0.333333	2	0	2	0
chr10__95537313__95537466__SINE__B1_Mur4__Alu	4	chr10	95537313	95537466	B1_Mur4	Alu	0.120259	0.0138889	0.122138	0.0379407	3	0	1	0
chr11__106685762__106685958__SINE__B3__B2	4	chr11	106685762	106685958	B3	B2	0.0342562	0.0260126	0.0417574	0.0285457	2	1	2	1
chr11__3920014__3920162__SINE__B1_Mur4__Alu	4	chr11	3920014	3920162	B1_Mur4	Alu	0.0566082	0.0513393	0.0362418	0.0306861	2	0	2	1
chr11__4142693__4142829__SINE__B1_Mur3__Alu	4	chr11	4142693	4142829	B1_Mur3	Alu	0.0534091	0.0323661	0.0920498	0.063357	2	0	2	1
chr11__52125625__52125755__SINE__B1_Mur2__Alu	4	chr11	52125625	52125755	B1_Mur2	Alu	0.0588399	0.01	0.0425966	0.00606061	3	0	1	0
chr11__61778956__61779158__SINE__B3__B2	4	chr11	61778956	61779158	B3	B2	0.237879	0.194444	0.292929	0.130952	2	0	2	0
chr11__68945850__68945996__SINE__B1_Mus1__Alu	4	chr11	68945850	68945996	B1_Mus1	Alu	0.0606618	0	0.101847	0.00757575	2	0	2	0
chr11__75646142__75646242__SINE__B2_Mm2__B2	4	chr11	75646142	75646242	B2_Mm2	B2	0.11337	0.0178571	0.302989	0.119048	1	0	3	1
chr12__111311304__111311427__SINE__B1_Mm__Alu	4	chr12	111311304	111311427	B1_Mm	Alu	0.0850694	0.0536364	0.0780026	0.0439024	2	1	2	1
chr12__55216402__55216564__SINE__B4__B4	4	chr12	55216402	55216564	B4	B4	0.0417391	0.0112509	0.0363734	0.0050763	2	0	2	0
chr12__84972387__84972506__SINE__B1_Mur2__Alu	4	chr12	84972387	84972506	B1_Mur2	Alu	0.362963	0.120262	0.267643	0.0534188	2	1	2	0
chr13__14051941__14052116__SINE__B3__B2	4	chr13	14051941	14052116	B3	B2	0.0137003	0.00825768	0.0351032	0.00954105	1	0	3	1
chr16__31178191__31178326__SINE__B1_Mm__Alu	4	chr16	31178191	31178326	B1_Mm	Alu	0.0985862	0.0460317	0.147109	0.0203081	3	0	1	0
chr19__3906117__3906258__SINE__B1_Mus2__Alu	4	chr19	3906117	3906258	B1_Mus2	Alu	0.0153093	0.0101233	0.0266979	0.0132299	2	0	2	1
chr19__6918345__6918459__SINE__B1_Mur4__Alu	4	chr19	6918345	6918459	B1_Mur4	Alu	0.108389	0.0702764	0.136667	0.0618873	2	1	2	1
chr19__8852697__8852845__SINE__B1_Mur1__Alu	4	chr19	8852697	8852845	B1_Mur1	Alu	0.045954	0	0.231312	0.0357143	1	0	3	0
chr2__104757421__104757551__SINE__B1_Mur2__Alu	4	chr2	104757421	104757551	B1_Mur2	Alu	0.0367125	0.0294698	0.0385343	0.00242719	2	0	2	0
chr2__120621141__120621276__SINE__B1_Mm__Alu	4	chr2	120621141	120621276	B1_Mm	Alu	0.0216147	0.0121497	0.0310853	0.0106734	2	1	2	1
chr2__126869908__126870057__SINE__B1_Mus1__Alu	4	chr2	126869908	126870057	B1_Mus1	Alu	0.191453	0.0559441	0.153846	0.0555557	2	0	2	0
chr2__154537863__154538016__SINE__ID_B1__B4	4	chr2	154537863	154538016	ID_B1	B4	0.122269	0.0205177	0.147372	0.0417772	2	0	2	1
chr2__166939375__166939502__SINE__B1_Mur1__Alu	4	chr2	166939375	166939502	B1_Mur1	Alu	0.211597	0.1	0.209524	0	3	0	1	0
chr2__31031699__31031846__SINE__B1_Mus1__Alu	4	chr2	31031699	31031846	B1_Mus1	Alu	0.0262304	0.00396825	0.0386892	0.00514833	2	0	2	0
chr2__36254743__36254880__SINE__B1_Mm__Alu	4	chr2	36254743	36254880	B1_Mm	Alu	0.0896739	0.00510204	0.0850193	0.0109067	2	0	2	0
chr3__103066056__103066165__SINE__PB1D10__Alu	4	chr3	103066056	103066165	PB1D10	Alu	0.043501	0.0213695	0.0490589	0.0231156	2	1	2	1
chr3__116676795__116676939__SINE__B1_Mur2__Alu	4	chr3	116676795	116676939	B1_Mur2	Alu	0.11039	0.012987	0.216739	0.0826446	1	0	3	0
chr3__40793179__40793364__SINE__B3__B2	4	chr3	40793179	40793364	B3	B2	0.0236309	0.0143953	0.0273782	0.0166892	2	1	2	1
chr3__88731173__88731359__SINE__B2_Mm1a__B2	4	chr3	88731173	88731359	B2_Mm1a	B2	0.224102	0.0390977	0.119236	0.0172065	3	0	1	0
chr3__95183454__95183605__SINE__ID_B1__B4	4	chr3	95183454	95183605	ID_B1	B4	0.162963	0.0383498	0.112819	0.0238847	2	1	2	1
chr4__103164658__103164761__SINE__PB1D7__Alu	4	chr4	103164658	103164761	PB1D7	Alu	0.0218449	0.00626474	0.0214887	0.00443246	2	0	2	0
chr4__108230826__108230974__SINE__B1_Mus2__Alu	4	chr4	108230826	108230974	B1_Mus2	Alu	0.0210746	0.00777842	0.0289335	0.0131582	2	0	2	1
chr5__104504946__104505089__SINE__B1_Mur1__Alu	4	chr5	104504946	104505089	B1_Mur1	Alu	0.0433716	0.0074074	0.0472415	0.020582	2	0	2	1
chr5__121805464__121805591__SINE__B1_Mur1__Alu	4	chr5	121805464	121805591	B1_Mur1	Alu	0.0416667	0.0246601	0.0993412	0.00980392	2	0	2	0
chr5__125414242__125414389__SINE__B1_Mus1__Alu	4	chr5	125414242	125414389	B1_Mus1	Alu	0.0381513	0.0158725	0.0481499	0.0173785	1	0	3	0
chr5__142870150__142870298__SINE__B1_Mus2__Alu	4	chr5	142870150	142870298	B1_Mus2	Alu	0.0830743	0.015873	0.0815295	0.027474	2	0	2	1
chr5__150237836__150238048__SINE__B3A__B2	4	chr5	150237836	150238048	B3A	B2	0.19246	0.0868132	0.295238	0.2	2	1	2	1
chr5__32842742__32842883__SINE__B1_Mur1__Alu	4	chr5	32842742	32842883	B1_Mur1	Alu	0.214336	0.0817308	0.236111	0.12353	2	1	2	1
chr6__120964139__120964271__SINE__B1F2__Alu	4	chr6	120964139	120964271	B1F2	Alu	0.208081	0.128571	0.248718	0.0285714	2	0	2	0
chr7__126790703__126790866__SINE__B1_Mus1__Alu	4	chr7	126790703	126790866	B1_Mus1	Alu	0.0763849	0.071337	0.0763636	0.0522368	2	1	2	1
chr7__132933500__132933630__SINE__B1_Mus1__Alu	4	chr7	132933500	132933630	B1_Mus1	Alu	0.0618495	0.0469698	0.242641	0.0274564	2	0	2	0
chr7__27205509__27205611__SINE__B1_Mur1__Alu	4	chr7	27205509	27205611	B1_Mur1	Alu	0.166748	0.0548612	0.19979	0.0575758	2	1	2	1
chr7__29222758__29222897__SINE__B1_Mus2__Alu	4	chr7	29222758	29222897	B1_Mus2	Alu	0.0214286	0	0.0898849	0.0313957	1	0	3	0
chr7__5027143__5027288__SINE__B1_Mus2__Alu	4	chr7	5027143	5027288	B1_Mus2	Alu	0.0710785	0.0660714	0.0818182	0.0417502	2	0	2	0
chr7__80241920__80242073__SINE__B1_Mur3__Alu	4	chr7	80241920	80242073	B1_Mur3	Alu	0.132099	0	0.0786977	0.0336941	3	0	1	0
chr8__121096965__121097100__SINE__B1_Mus1__Alu	4	chr8	121096965	121097100	B1_Mus1	Alu	0.0461061	0.0342186	0.0633982	0.0227835	3	1	1	0
chr8__121962240__121962404__SINE__B1_Mus1__Alu	4	chr8	121962240	121962404	B1_Mus1	Alu	0.0789017	0.0380501	0.0696917	0.0279942	3	1	1	0
chr8__124047454__124047576__SINE__B1_Mur1__Alu	4	chr8	124047454	124047576	B1_Mur1	Alu	0.0342994	0.00884146	0.0738871	0.0175093	2	0	2	1
chr8__25571334__25571479__SINE__B1_Mus2__Alu	4	chr8	25571334	25571479	B1_Mus2	Alu	0.133442	0.060606	0.104167	0.0665862	3	1	1	0
chr8__4293879__4294010__SINE__ID_B1__B4	4	chr8	4293879	4294010	ID_B1	B4	0.127997	0.06734	0.146767	0.058201	2	1	2	1
chr8__72478197__72478256__SINE__PB1D9__Alu	4	chr8	72478197	72478256	PB1D9	Alu	0.192307	0	0.107801	0.0544871	2	0	2	1
chr9__107840632__107840762__SINE__B1_Mus2__Alu	4	chr9	107840632	107840762	B1_Mus2	Alu	0.15	0.146193	0.163333	0	2	1	2	0
chr9__21176814__21176871__SINE__B3A__B2	4	chr9	21176814	21176871	B3A	B2	0.185664	0.0311891	0.0992647	0.0595968	2	1	2	1
chr9__96744298__96744430__SINE__B1_Mur2__Alu	4	chr9	96744298	96744430	B1_Mur2	Alu	0.124735	0.0145833	0.108694	0.0179924	3	0	1	0
chrX__101207660__101207768__SINE__PB1D9__Alu	4	chrX	101207660	101207768	PB1D9	Alu	0.0614349	0	0.0687753	0.0200161	2	0	2	0
chr1__170165607__170165801__SINE__B3__B2	3	chr1	170165607	170165801	B3	B2	0.55	0.5	0.714286	0.466666	1	0	2	1
chr1__183409747__183409889__SINE__B1_Mus1__Alu	3	chr1	183409747	183409889	B1_Mus1	Alu	0.0140046	0.00478951	0.0377408	0.010781	1	0	2	0
chr1__86345136__86345251__SINE__B1_Mur4__Alu	3	chr1	86345136	86345251	B1_Mur4	Alu	0.0370175	0.0187494	0.0414193	0.0160751	1	0	2	1
chr11__106653499__106653691__SINE__B2_Mm1a__B2	3	chr11	106653499	106653691	B2_Mm1a	B2	0.163542	0	0.115138	0.0178571	1	0	2	0
chr11__115910087__115910227__SINE__B1_Mur1__Alu	3	chr11	115910087	115910227	B1_Mur1	Alu	0.255556	0.199939	0.238095	0.111111	2	1	1	0
chr11__116485527__116485680__SINE__B1_Mur3__Alu	3	chr11	116485527	116485680	B1_Mur3	Alu	0.0681817	0	0.227381	0	2	0	1	0
chr11__35787825__35787930__SINE__B1_Mur1__Alu	3	chr11	35787825	35787930	B1_Mur1	Alu	0.0123936	0.0114182	0.0335907	0.00904796	1	0	2	0
chr11__45865488__45865636__SINE__B3__B2	3	chr11	45865488	45865636	B3	B2	0.120701	0.0980391	0.0817308	0.03125	2	1	1	0
chr11__70034955__70035103__SINE__B1_Mur1__Alu	3	chr11	70034955	70035103	B1_Mur1	Alu	0.0910756	0.070397	0.0793233	0.025	2	1	1	0
chr11__75739701__75739804__SINE__PB1D9__Alu	3	chr11	75739701	75739804	PB1D9	Alu	0.0197724	0	0.0705127	0.00865947	1	0	2	0
chr12__111649438__111649572__SINE__B1_Mur2__Alu	3	chr12	111649438	111649572	B1_Mur2	Alu	0.2	0.0107527	0.146465	0.03	2	0	1	0
chr12__83568152__83568286__SINE__B1_Mur1__Alu	3	chr12	83568152	83568286	B1_Mur1	Alu	0.050989	0.0278541	0.133283	0.042262	1	0	2	0
chr12__85234982__85235130__SINE__B1_Mus1__Alu	3	chr12	85234982	85235130	B1_Mus1	Alu	0.1	0.0166667	0.128994	0.0327703	1	0	2	1
chr14__14119167__14119303__SINE__B1_Mus1__Alu	3	chr14	14119167	14119303	B1_Mus1	Alu	0.105098	0.0253411	0.0566667	0.00571428	2	0	1	0
chr14__21797774__21797843__SINE__B1_Mur4__Alu	3	chr14	21797774	21797843	B1_Mur4	Alu	0.0303601	0.00287356	0.0259692	0.00856399	1	0	2	0
chr14__21839557__21839688__SINE__B1_Mus1__Alu	3	chr14	21839557	21839688	B1_Mus1	Alu	0.0938624	0.0813491	0.109379	0.0336134	2	0	1	0
chr14__31093286__31093470__SINE__B3__B2	3	chr14	31093286	31093470	B3	B2	0.253571	0.0571428	0.28	0.02	1	0	2	0
chr14__45338766__45338937__SINE__B3A__B2	3	chr14	45338766	45338937	B3A	B2	0.0846979	0.0524267	0.0954061	0.0401207	1	0	2	1
chr14__54437950__54438088__SINE__B1_Mus2__Alu	3	chr14	54437950	54438088	B1_Mus2	Alu	0.173737	0	0.111111	0.0857143	2	0	1	0
chr15__73204219__73204337__SINE__PB1D7__Alu	3	chr15	73204219	73204337	PB1D7	Alu	0.148055	0.0125	0.111111	0.0513393	2	0	1	0
chr15__89135932__89136080__SINE__B1_Mur1__Alu	3	chr15	89135932	89136080	B1_Mur1	Alu	0.123381	0.0538462	0.107143	0.0625	1	0	2	1
chr16__4388755__4388886__SINE__B1_Mur2__Alu	3	chr16	4388755	4388886	B1_Mur2	Alu	0.0993589	0.0761906	0.183673	0	1	0	2	0
chr18__35674461__35674599__SINE__B1F__Alu	3	chr18	35674461	35674599	B1F	Alu	0.0679691	0.0046083	0.0677842	0.0220239	1	0	2	1
chr19__4783638__4783776__SINE__B1_Mur2__Alu	3	chr19	4783638	4783776	B1_Mur2	Alu	0.0296033	0.00271739	0.0385541	0.0144676	1	0	2	1
chr19__61100152__61100276__SINE__PB1D9__Alu	3	chr19	61100152	61100276	PB1D9	Alu	0.0410505	0.0185927	0.0468957	0	1	0	2	0
chr19__6483838__6483985__SINE__B1_Mm__Alu	3	chr19	6483838	6483985	B1_Mm	Alu	0.238095	0	0.233333	0	1	0	2	0
chr19__7535448__7535600__SINE__B1_Mur4__Alu	3	chr19	7535448	7535600	B1_Mur4	Alu	0.0132623	0.00406527	0.0154215	0.00722187	1	0	2	1
chr19__8890999__8891146__SINE__B1_Mus1__Alu	3	chr19	8890999	8891146	B1_Mus1	Alu	0.0359082	0.0332071	0.0320725	0.0107614	1	0	2	0
chr2__126818392__126818582__SINE__B2_Mm2__B2	3	chr2	126818392	126818582	B2_Mm2	B2	0.176923	0.075	0.145238	0.0571428	2	1	1	0
chr2__131248086__131248209__SINE__B1_Mus1__Alu	3	chr2	131248086	131248209	B1_Mus1	Alu	0.205357	0.0692532	0.138212	0.025	1	0	2	0
chr2__152774576__152774721__SINE__B1_Mur3__Alu	3	chr2	152774576	152774721	B1_Mur3	Alu	0.131233	0.00757575	0.0406403	0.0108696	2	0	1	0
chr2__163468347__163468466__SINE__PB1D9__Alu	3	chr2	163468347	163468466	PB1D9	Alu	0.0351852	0.0155797	0.102748	0.0226541	1	0	2	1
chr2__26432836__26432982__SINE__B1_Mus1__Alu	3	chr2	26432836	26432982	B1_Mus1	Alu	0.180969	0	0.26	0.0971428	2	0	1	0
chr2__31694094__31694221__SINE__B1F2__Alu	3	chr2	31694094	31694221	B1F2	Alu	0.034632	0	0.215368	0	1	0	2	0
chr4__108232559__108232699__SINE__B1_Mur2__Alu	3	chr4	108232559	108232699	B1_Mur2	Alu	0.0256343	0.00465784	0.0167784	0.00571155	2	0	1	0
chr4__116539088__116539275__SINE__B3A__B2	3	chr4	116539088	116539275	B3A	B2	0.351191	0.0625	0.297876	0.108333	1	0	2	0
chr4__123659863__123660002__SINE__B1_Mur3__Alu	3	chr4	123659863	123660002	B1_Mur3	Alu	0.0431217	0.0117647	0.107143	0	1	0	2	0
chr4__83438064__83438149__SINE__B1_Mur2__Alu	3	chr4	83438064	83438149	B1_Mur2	Alu	0.0998024	0.0540935	0.141667	0.0348558	2	0	1	0
chr5__110661143__110661290__SINE__B1_Mm__Alu	3	chr5	110661143	110661290	B1_Mm	Alu	0.0308146	0.0111429	0.0377263	0.0174953	1	0	2	0
chr6__115846748__115846889__SINE__ID_B1__B4	3	chr6	115846748	115846889	ID_B1	B4	0.144445	0	0.0724637	0.031922	2	0	1	0
chr6__72430433__72430578__SINE__B1_Mus2__Alu	3	chr6	72430433	72430578	B1_Mus2	Alu	0.0280937	0.00218743	0.010808	0.00841017	2	0	1	0
chr6__86199910__86200076__SINE__B3A__B2	3	chr6	86199910	86200076	B3A	B2	0.312889	0.235714	0.291208	0.0714285	2	1	1	0
chr6__86386025__86386198__SINE__B1_Mur2__Alu	3	chr6	86386025	86386198	B1_Mur2	Alu	0.236111	0.131481	0.237533	0	2	1	1	0
chr6__87805497__87805642__SINE__RSINE1__B4	3	chr6	87805497	87805642	RSINE1	B4	0.0353444	0.0192888	0.0461755	0.0154124	2	1	1	0
chr7__127527084__127527268__SINE__B3A__B2	3	chr7	127527084	127527268	B3A	B2	0.160318	0.0196078	0.190171	0.046798	2	0	1	0
chr7__27821851__27822043__SINE__B2_Mm1a__B2	3	chr7	27821851	27822043	B2_Mm1a	B2	0.0735426	0	0.0747619	0.0390588	2	0	1	0
chr7__55978278__55978415__SINE__B1_Mus1__Alu	3	chr7	55978278	55978415	B1_Mus1	Alu	0.164286	0	0.441326	0	1	0	2	0
chr8__107092079__107092221__SINE__B1_Mur1__Alu	3	chr8	107092079	107092221	B1_Mur1	Alu	0.101668	0.0590277	0.106061	0.0293522	2	0	1	0
chr8__111184790__111184946__SINE__B1_Mur2__Alu	3	chr8	111184790	111184946	B1_Mur2	Alu	0.158702	0.15	0.263636	0	1	0	2	0
chr8__25723680__25723821__SINE__B1_Mus1__Alu	3	chr8	25723680	25723821	B1_Mus1	Alu	0.2875	0.0744048	0.296428	0.0504808	2	1	1	0
chr8__47978899__47979082__SINE__B3__B2	3	chr8	47978899	47979082	B3	B2	0.0515807	0	0.129487	0.00980392	1	0	2	0
chr8__70179601__70179769__SINE__B2_Mm2__B2	3	chr8	70179601	70179769	B2_Mm2	B2	0.0745454	0.0521008	0.12381	0.0571428	1	0	2	1
chr8__75095440__75095591__SINE__B1_Mus2__Alu	3	chr8	75095440	75095591	B1_Mus2	Alu	0.0349951	0.00983893	0.0226348	0.0129215	2	0	1	0
chr8__84956612__84956743__SINE__B1_Mur1__Alu	3	chr8	84956612	84956743	B1_Mur1	Alu	0.166666	0	0.416666	0	1	0	2	0
chr8__94669917__94670059__SINE__B1_Mur4__Alu	3	chr8	94669917	94670059	B1_Mur4	Alu	0.0904313	0.0208333	0.08367	0.0124777	2	0	1	0
chr9__35184893__35185045__SINE__B1_Mur2__Alu	3	chr9	35184893	35185045	B1_Mur2	Alu	0.124147	0.104362	0.122925	0.121067	1	0	2	1
chr9__43091541__43091649__SINE__ID_B1__B4	3	chr9	43091541	43091649	ID_B1	B4	0.18029	0.0807692	0.194444	0.1	2	1	1	0
chr9__54947690__54947791__SINE__PB1D9__Alu	3	chr9	54947690	54947791	PB1D9	Alu	0.101064	0	0.120912	0.0569392	1	0	2	1
chr9__71688098__71688263__SINE__B3A__B2	3	chr9	71688098	71688263	B3A	B2	0.173093	0	0.125	0.05	1	0	2	0
chr1__128273827__128274033__SINE__B3__B2	2	chr1	128273827	128274033	B3	B2	0.12069	0.0142857	0.104166	0.0135135	1	0	1	0
chr1__150383711__150383842__SINE__B1_Mus1__Alu	2	chr1	150383711	150383842	B1_Mus1	Alu	0.258929	0.0462963	0.222222	0.0185185	1	0	1	0
chr1__156427939__156428074__SINE__B1_Mur3__Alu	2	chr1	156427939	156428074	B1_Mur3	Alu	0.0784079	0.0271911	0.123542	0.0186821	1	0	1	0
chr1__179529743__179529880__SINE__B1_Mur1__Alu	2	chr1	179529743	179529880	B1_Mur1	Alu	0.216071	0	0.166667	0.0666667	1	0	1	0
chr1__39381947__39382103__SINE__B1_Mur4__Alu	2	chr1	39381947	39382103	B1_Mur4	Alu	0.0654579	0	0.122241	0.025	1	0	1	0
chr10__128117577__128117692__SINE__B1_Mus1__Alu	2	chr10	128117577	128117692	B1_Mus1	Alu	0.0654761	0	0.122449	0.0846939	1	0	1	0
chr10__62762449__62762589__SINE__B1_Mm__Alu	2	chr10	62762449	62762589	B1_Mm	Alu	0.075	0.0672222	0.0884921	0.0450549	1	0	1	0
chr10__80685892__80686006__SINE__B1_Mur2__Alu	2	chr10	80685892	80686006	B1_Mur2	Alu	0.0105893	0.00764158	0.0147677	0.00633386	1	0	1	0
chr10__91098461__91098553__SINE__PB1D10__Alu	2	chr10	91098461	91098553	PB1D10	Alu	0.0206944	0.0086207	0.0292512	0.0165167	1	0	1	0
chr11__107090669__107090801__SINE__B1_Mus2__Alu	2	chr11	107090669	107090801	B1_Mus2	Alu	0.2	0.0833333	0.428571	0	1	0	1	0
chr11__113693020__113693229__SINE__B3__B2	2	chr11	113693020	113693229	B3	B2	0.566666	0	0.3	0	1	0	1	0
chr11__115387079__115387260__SINE__B2_Mm2__B2	2	chr11	115387079	115387260	B2_Mm2	B2	0.0239739	0.00943647	0.0246865	0.0138772	1	0	1	0
chr11__120383811__120383988__SINE__B2_Mm2__B2	2	chr11	120383811	120383988	B2_Mm2	B2	0.076923	0.0333333	0.111111	0.047619	1	0	1	0
chr11__62377755__62377912__SINE__B1_Mur3__Alu	2	chr11	62377755	62377912	B1_Mur3	Alu	0.2	0.0833335	0.3	0.25	1	0	1	0
chr11__6263502__6263648__SINE__B2_Mm2__B2	2	chr11	6263502	6263648	B2_Mm2	B2	0.158333	0.05	0.229167	0.0934065	1	0	1	0
chr11__67513499__67513642__SINE__B3__B2	2	chr11	67513499	67513642	B3	B2	0.12	0.04	0.222222	0.05	1	0	1	0
chr11__75686704__75686886__SINE__B2_Mm2__B2	2	chr11	75686704	75686886	B2_Mm2	B2	0.0789474	0.0714286	0.111111	0.027027	1	0	1	0
chr11__76177781__76177970__SINE__B2_Mm1a__B2	2	chr11	76177781	76177970	B2_Mm1a	B2	0.444444	0.2	0.428571	0.285714	1	0	1	0
chr11__76354118__76354207__SINE__B1_Mur2__Alu	2	chr11	76354118	76354207	B1_Mur2	Alu	0.3125	0.2	0.5	0	1	0	1	0
chr11__76747303__76747482__SINE__B3__B2	2	chr11	76747303	76747482	B3	B2	0.146429	0.0809524	0.140476	0.0408163	1	0	1	0
chr11__77535967__77536063__SINE__B1F2__Alu	2	chr11	77535967	77536063	B1F2	Alu	0.0173313	0.00339954	0.0172283	0.00360821	1	0	1	0
chr11__94540932__94541124__SINE__B3__B2	2	chr11	94540932	94541124	B3	B2	0.122711	0.0682539	0.095238	0.0456522	1	0	1	0
chr11__96773720__96773847__SINE__B1F2__Alu	2	chr11	96773720	96773847	B1F2	Alu	0.553571	0	0.416666	0.166666	1	0	1	0
chr11__97238408__97238527__SINE__B2_Mm2__B2	2	chr11	97238408	97238527	B2_Mm2	B2	0.0454546	0.0390374	0.0931817	0.0595239	1	0	1	0
chr11__97875160__97875349__SINE__B2_Mm1a__B2	2	chr11	97875160	97875349	B2_Mm1a	B2	0.166667	0.111111	0.944444	0.333333	1	0	1	0
chr12__101919828__101919900__SINE__ID4__ID	2	chr12	101919828	101919900	ID4	ID	0.0416667	0.00641027	0.0212766	0.0159878	1	0	1	0
chr12__112985268__112985369__SINE__B1_Mur2__Alu	2	chr12	112985268	112985369	B1_Mur2	Alu	0.181818	0	0.166667	0.025641	1	0	1	0
chr12__65039238__65039406__SINE__B3__B2	2	chr12	65039238	65039406	B3	B2	0.102041	0.0512821	0.0892857	0.04	1	0	1	0
chr12__73234352__73234494__SINE__B1_Mus1__Alu	2	chr12	73234352	73234494	B1_Mus1	Alu	0.0493827	0.0185186	0.305556	0.0555556	1	0	1	0
chr12__78877383__78877490__SINE__PB1D9__Alu	2	chr12	78877383	78877490	PB1D9	Alu	0.08	0.0144928	0.0875	0.0123457	1	0	1	0
chr13__100701671__100701780__SINE__B1_Mur4__Alu	2	chr13	100701671	100701780	B1_Mur4	Alu	0.0619657	0	0.0856748	0	1	0	1	0
chr13__109842037__109842182__SINE__B1_Mur4__Alu	2	chr13	109842037	109842182	B1_Mur4	Alu	0.109769	0.0285714	0.247619	0.0571429	1	0	1	0
chr13__14014438__14014584__SINE__B1F__Alu	2	chr13	14014438	14014584	B1F	Alu	0.0870288	0.00680271	0.0328346	0.00492611	1	0	1	0
chr13__14025474__14025623__SINE__B1_Mus1__Alu	2	chr13	14025474	14025623	B1_Mus1	Alu	0.0641447	0.0166666	0.100372	0.0155189	1	0	1	0
chr13__14053419__14053616__SINE__B2_Mm1a__B2	2	chr13	14053419	14053616	B2_Mm1a	B2	0.0100372	0.00510027	0.0160453	0.00486121	1	0	1	0
chr13__59819710__59819850__SINE__B1_Mur1__Alu	2	chr13	59819710	59819850	B1_Mur1	Alu	0.0172414	0.0122409	0.0318182	0.00612998	1	0	1	0
chr14__26649360__26649556__SINE__B3__B2	2	chr14	26649360	26649556	B3	B2	0.0743591	0.0370371	0.15	0.0128205	1	0	1	0
chr15__5218784__5218902__SINE__PB1D10__Alu	2	chr15	5218784	5218902	PB1D10	Alu	0.0255453	0	0.0250428	0.00899745	1	0	1	0
chr15__53244639__53244799__SINE__B1_Mus2__Alu	2	chr15	53244639	53244799	B1_Mus2	Alu	0.0146643	0.00831243	0.0318176	0.00490196	1	0	1	0
chr15__78884410__78884610__SINE__ID_B1__B4	2	chr15	78884410	78884610	ID_B1	B4	0.444444	0.285714	0.538462	0.181818	1	0	1	0
chr15__80142449__80142566__SINE__B1_Mus1__Alu	2	chr15	80142449	80142566	B1_Mus1	Alu	0.090909	0.09	0.191515	0.0320513	1	0	1	0
chr15__82890996__82891129__SINE__B1_Mur2__Alu	2	chr15	82890996	82891129	B1_Mur2	Alu	0.0513227	0.0469652	0.105	0.0352941	1	0	1	0
chr15__83329927__83330076__SINE__B1_Mur1__Alu	2	chr15	83329927	83330076	B1_Mur1	Alu	0.162121	0.0555555	0.125	0	1	0	1	0
chr15__98527229__98527349__SINE__B1_Mur2__Alu	2	chr15	98527229	98527349	B1_Mur2	Alu	0.125	0.117647	0.266667	0	1	0	1	0
chr15__98823279__98823482__SINE__B3__B2	2	chr15	98823279	98823482	B3	B2	0.0593513	0	0.0714287	0.0222222	1	0	1	0
chr16__11144593__11144737__SINE__B1_Mur4__Alu	2	chr16	11144593	11144737	B1_Mur4	Alu	0.0374603	0.00854591	0.0334034	0.0231968	1	0	1	0
chr16__20124296__20124471__SINE__B3A__B2	2	chr16	20124296	20124471	B3A	B2	0.0110659	0.0072802	0.0150011	0.00705563	1	0	1	0
chr16__30319760__30319907__SINE__B1_Mus2__Alu	2	chr16	30319760	30319907	B1_Mus2	Alu	0.0290156	0.00609755	0.0686141	0.0257086	1	0	1	0
chr16__31252269__31252487__SINE__B4A__B4	2	chr16	31252269	31252487	B4A	B4	0.0211029	0	0.0313588	0.00894241	1	0	1	0
chr16__31763087__31763295__SINE__B3__B2	2	chr16	31763087	31763295	B3	B2	0.0714285	0.0192308	0.107143	0.0526316	1	0	1	0
chr16__35926867__35926966__SINE__ID_B1__B4	2	chr16	35926867	35926966	ID_B1	B4	0.0354575	0.00725644	0.0112283	0.00255715	1	0	1	0
chr16__4636214__4636350__SINE__B1_Mur2__Alu	2	chr16	4636214	4636350	B1_Mur2	Alu	0.0352078	0.0243697	0.0707071	0.0375817	1	0	1	0
chr16__5026036__5026191__SINE__B1_Mur3__Alu	2	chr16	5026036	5026191	B1_Mur3	Alu	0.214286	0.142857	0.375	0	1	0	1	0
chr17__33688656__33688763__SINE__B1_Mur2__Alu	2	chr17	33688656	33688763	B1_Mur2	Alu	0.0353536	0.00833333	0.0568665	0	1	0	1	0
chr17__33827937__33828092__SINE__B1_Mur4__Alu	2	chr17	33827937	33828092	B1_Mur4	Alu	0.0333333	0.0247222	0.125463	0.0313853	1	0	1	0
chr17__35977502__35977624__SINE__B1_Mus1__Alu	2	chr17	35977502	35977624	B1_Mus1	Alu	0.0977564	0	0.0955296	0.0178571	1	0	1	0
chr17__43367542__43367666__SINE__B1F__Alu	2	chr17	43367542	43367666	B1F	Alu	0.311111	0	0.153846	0	1	0	1	0
chr17__46775211__46775328__SINE__PB1D9__Alu	2	chr17	46775211	46775328	PB1D9	Alu	0.0123452	0.00365296	0.0150945	0.00559538	1	0	1	0
chr17__56690740__56690892__SINE__B1_Mus1__Alu	2	chr17	56690740	56690892	B1_Mus1	Alu	0.10699	0.0429293	0.0708333	0.0119048	1	0	1	0
chr18__36598312__36598451__SINE__B1_Mm__Alu	2	chr18	36598312	36598451	B1_Mm	Alu	0.114583	0	0.2	0.0504201	1	0	1	0
chr18__76289565__76289721__SINE__B1_Mus1__Alu	2	chr18	76289565	76289721	B1_Mus1	Alu	0.215842	0.0769231	0.237599	0.09375	1	0	1	0
chr18__76290352__76290491__SINE__B1_Mus1__Alu	2	chr18	76290352	76290491	B1_Mus1	Alu	0.0602273	0.0513393	0.102778	0.03125	1	0	1	0
chr19__28633497__28633671__SINE__B3__B2	2	chr19	28633497	28633671	B3	B2	0.0408164	0.0312777	0.0625	0.0166667	1	0	1	0
chr19__36882914__36883039__SINE__B1_Mur4__Alu	2	chr19	36882914	36883039	B1_Mur4	Alu	0.228571	0.0434783	0.263158	0.0454545	1	0	1	0
chr19__7479352__7479451__SINE__B1_Mus2__Alu	2	chr19	7479352	7479451	B1_Mus2	Alu	0.0857143	0.0625	0.230769	0.0666667	1	0	1	0
chr2__127284773__127284922__SINE__B1_Mur2__Alu	2	chr2	127284773	127284922	B1_Mur2	Alu	0.15	0.110256	0.276786	0	1	0	1	0
chr2__144539884__144540012__SINE__B1_Mus1__Alu	2	chr2	144539884	144540012	B1_Mus1	Alu	0.0175349	0.00446429	0.0449455	0.00851156	1	0	1	0
chr2__145799969__145800108__SINE__B1_Mur3__Alu	2	chr2	145799969	145800108	B1_Mur3	Alu	0.064516	0	0.105882	0.037037	1	0	1	0
chr2__152270462__152270662__SINE__B3__B2	2	chr2	152270462	152270662	B3	B2	0.0875	0.0491342	0.075	0	1	0	1	0
chr2__152273299__152273436__SINE__B1_Mus1__Alu	2	chr2	152273299	152273436	B1_Mus1	Alu	0.0391002	0.00347222	0.0342329	0.00403225	1	0	1	0
chr2__153266265__153266365__SINE__PB1D10__Alu	2	chr2	153266265	153266365	PB1D10	Alu	0.05	0	0.04	0.0304525	1	0	1	0
chr2__157013765__157013866__SINE__B1_Mus1__Alu	2	chr2	157013765	157013866	B1_Mus1	Alu	0.0136226	0.00123457	0.00619247	0.00446093	1	0	1	0
chr2__165843567__165843678__SINE__B1_Mur2__Alu	2	chr2	165843567	165843678	B1_Mur2	Alu	0.0344827	0.015625	0.0357143	0.0270271	1	0	1	0
chr2__166939279__166939372__SINE__B1_Mur3__Alu	2	chr2	166939279	166939372	B1_Mur3	Alu	0.272727	0.05	0.2625	0	1	0	1	0
chr2__25604269__25604407__SINE__B1_Mus1__Alu	2	chr2	25604269	25604407	B1_Mus1	Alu	0.079657	0.047619	0.0886939	0.0625	1	0	1	0
chr2__26395956__26396090__SINE__B1F2__Alu	2	chr2	26395956	26396090	B1F2	Alu	0.0149259	0.00915981	0.0172867	0.0132145	1	0	1	0
chr2__70686925__70687118__SINE__B3__B2	2	chr2	70686925	70687118	B3	B2	0.0660493	0.0444445	0.05	0	1	0	1	0
chr3__40794123__40794283__SINE__B2_Mm2__B2	2	chr3	40794123	40794283	B2_Mm2	B2	0.016277	0.00381444	0.0115173	0.00395886	1	0	1	0
chr4__108231994__108232078__SINE__PB1D10__Alu	2	chr4	108231994	108232078	PB1D10	Alu	0.023012	0.0060241	0.0308054	0.00648699	1	0	1	0
chr4__121212873__121212987__SINE__B1_Mus1__Alu	2	chr4	121212873	121212987	B1_Mus1	Alu	0.0840203	0.0725274	0.0848538	0.0166667	1	0	1	0
chr4__125104393__125104648__SINE__B4A__B4	2	chr4	125104393	125104648	B4A	B4	0.208333	0.166667	0.190476	0.125541	1	0	1	0
chr4__136564819__136564931__SINE__PB1D9__Alu	2	chr4	136564819	136564931	PB1D9	Alu	0.0603758	0.0285714	0.112192	0.0681819	1	0	1	0
chr4__145192111__145192322__SINE__B3__B2	2	chr4	145192111	145192322	B3	B2	0.218681	0.04	0.2	0	1	0	1	0
chr4__155611288__155611433__SINE__B1_Mur1__Alu	2	chr4	155611288	155611433	B1_Mur1	Alu	0.233631	0	0.142857	0.052564	1	0	1	0
chr4__155718351__155718463__SINE__B1_Mur2__Alu	2	chr4	155718351	155718463	B1_Mur2	Alu	0.0192308	0.00877193	0.0439814	0.0155039	1	0	1	0
chr4__45377491__45377639__SINE__B1_Mur1__Alu	2	chr4	45377491	45377639	B1_Mur1	Alu	0.0330645	0	0.0198079	0.0182069	1	0	1	0
chr4__59516110__59516267__SINE__B1_Mm__Alu	2	chr4	59516110	59516267	B1_Mm	Alu	0.0317156	0.00830499	0.0419007	0.0191761	1	0	1	0
chr5__108272366__108272493__SINE__B1_Mus1__Alu	2	chr5	108272366	108272493	B1_Mus1	Alu	0.102814	0.0992063	0.102041	0.0330979	1	0	1	0
chr5__110130073__110130220__SINE__B1_Mur1__Alu	2	chr5	110130073	110130220	B1_Mur1	Alu	0.14	0.0708333	0.201429	0.0167763	1	0	1	0
chr5__110333860__110333969__SINE__B1_Mur3__Alu	2	chr5	110333860	110333969	B1_Mur3	Alu	0.17381	0	0.115385	0.0714285	1	0	1	0
chr5__111382263__111382404__SINE__B1_Mus1__Alu	2	chr5	111382263	111382404	B1_Mus1	Alu	0.153846	0.1	0.35	0.25	1	0	1	0
chr5__123030898__123031023__SINE__B1_Mus1__Alu	2	chr5	123030898	123031023	B1_Mus1	Alu	0.0395583	0.0248918	0.0472853	0.0244663	1	0	1	0
chr5__129984913__129985056__SINE__B1_Mur2__Alu	2	chr5	129984913	129985056	B1_Mur2	Alu	0.0289855	0.0051282	0.0268939	0.003367	1	0	1	0
chr5__135408724__135408865__SINE__B1_Mur1__Alu	2	chr5	135408724	135408865	B1_Mur1	Alu	0.0172429	0.0129743	0.0232556	0.00292682	1	0	1	0
chr5__149625488__149625598__SINE__B1_Mus1__Alu	2	chr5	149625488	149625598	B1_Mus1	Alu	0.1	0.0333333	0.15	0.107143	1	0	1	0
chr5__150657685__150657850__SINE__B1F__Alu	2	chr5	150657685	150657850	B1F	Alu	0.15	0.0729166	0.25	0.0714285	1	0	1	0
chr5__30670800__30670999__SINE__B3__B2	2	chr5	30670800	30670999	B3	B2	0.1	0	0.276224	0.125	1	0	1	0
chr5__44624511__44624632__SINE__B3__B2	2	chr5	44624511	44624632	B3	B2	0.0208043	0	0.0378831	0	1	0	1	0
chr5__44792659__44792795__SINE__B1_Mur3__Alu	2	chr5	44792659	44792795	B1_Mur3	Alu	0.0622009	0	0.0988095	0	1	0	1	0
chr6__125194634__125194763__SINE__B1_Mur4__Alu	2	chr6	125194634	125194763	B1_Mur4	Alu	0.164103	0	0.47619	0.04	1	0	1	0
chr6__47871670__47871868__SINE__B3__B2	2	chr6	47871670	47871868	B3	B2	0.16973	0.111806	0.0869048	0.025	1	0	1	0
chr6__49258660__49258856__SINE__B2_Mm2__B2	2	chr6	49258660	49258856	B2_Mm2	B2	0.00838422	0.00790979	0.0170871	0.00244966	1	0	1	0
chr6__49258862__49259025__SINE__B3__B2	2	chr6	49258862	49259025	B3	B2	0.0189394	0.00836998	0.0238095	0.00378787	1	0	1	0
chr6__52759036__52759182__SINE__B1_Mm__Alu	2	chr6	52759036	52759182	B1_Mm	Alu	0.2	0.0555555	0.214285	0.0833335	1	0	1	0
chr6__72340652__72340815__SINE__B1_Mur1__Alu	2	chr6	72340652	72340815	B1_Mur1	Alu	0.466666	0	0.4	0.1	1	0	1	0
chr6__84092745__84092968__SINE__ID_B1__B4	2	chr6	84092745	84092968	ID_B1	B4	0.3	0.0625	0.269231	0.119048	1	0	1	0
chr6__87905744__87905936__SINE__B2_Mm1a__B2	2	chr6	87905744	87905936	B2_Mm1a	B2	0.131944	0.0392157	0.0772727	0.060606	1	0	1	0
chr7__110588817__110589008__SINE__B2_Mm2__B2	2	chr7	110588817	110589008	B2_Mm2	B2	0.136363	0.1	0.25	0	1	0	1	0
chr7__127599399__127599573__SINE__B3__B2	2	chr7	127599399	127599573	B3	B2	0.1875	0	0.375	0	1	0	1	0
chr7__144447991__144448125__SINE__B1_Mus2__Alu	2	chr7	144447991	144448125	B1_Mus2	Alu	0.0617274	0.0117057	0.0769433	0.0255934	1	0	1	0
chr7__16835727__16835818__SINE__B1_Mm__Alu	2	chr7	16835727	16835818	B1_Mm	Alu	0.2	0.0227273	0.147059	0.126923	1	0	1	0
chr7__25701167__25701377__SINE__B3__B2	2	chr7	25701167	25701377	B3	B2	0.0577713	0.0128205	0.0641027	0.0222222	1	0	1	0
chr7__27177264__27177410__SINE__B1_Mus1__Alu	2	chr7	27177264	27177410	B1_Mus1	Alu	0.119444	0.0952382	0.158883	0.0604827	1	0	1	0
chr7__4726639__4726798__SINE__B2_Mm1t__B2	2	chr7	4726639	4726798	B2_Mm1t	B2	0.262821	0.0673077	0.208333	0.025641	1	0	1	0
chr7__79925052__79925273__SINE__ID_B1__B4	2	chr7	79925052	79925273	ID_B1	B4	0.068182	0	0.0853494	0	1	0	1	0
chr8__104260833__104260952__SINE__PB1D9__Alu	2	chr8	104260833	104260952	PB1D9	Alu	0.3	0.285714	0.714286	0	1	0	1	0
chr8__105176026__105176144__SINE__B1_Mur1__Alu	2	chr8	105176026	105176144	B1_Mur1	Alu	0.352941	0.0833333	0.333333	0.0588235	1	0	1	0
chr8__120655590__120655669__SINE__B1F2__Alu	2	chr8	120655590	120655669	B1F2	Alu	0.1875	0.117647	0.225806	0.0909091	1	0	1	0
chr8__121965418__121965563__SINE__B1_Mus1__Alu	2	chr8	121965418	121965563	B1_Mus1	Alu	0.11717	0	0.197279	0.0238096	1	0	1	0
chr8__13107797__13107934__SINE__B1_Mur2__Alu	2	chr8	13107797	13107934	B1_Mur2	Alu	0.238095	0.133333	0.142857	0.0769231	1	0	1	0
chr8__27100085__27100231__SINE__B1_Mus1__Alu	2	chr8	27100085	27100231	B1_Mus1	Alu	0.125	0.0384615	0.108333	0	1	0	1	0
chr8__70012741__70012879__SINE__B1_Mur1__Alu	2	chr8	70012741	70012879	B1_Mur1	Alu	0.0766667	0.0188034	0.0538012	0.01	1	0	1	0
chr8__70032130__70032269__SINE__B1_Mur3__Alu	2	chr8	70032130	70032269	B1_Mur3	Alu	0.0444445	0	0.0872253	0	1	0	1	0
chr8__83732482__83732617__SINE__B1_Mur2__Alu	2	chr8	83732482	83732617	B1_Mur2	Alu	0.0445658	0.0238095	0.0321941	0.0294118	1	0	1	0
chr8__94064805__94064912__SINE__PB1D10__Alu	2	chr8	94064805	94064912	PB1D10	Alu	0.0277778	0	0.0357473	0	1	0	1	0
chr9__15266352__15266468__SINE__PB1D7__Alu	2	chr9	15266352	15266468	PB1D7	Alu	0.116558	0.0534188	0.242424	0.0185185	1	0	1	0
chr9__42982562__42982710__SINE__B1_Mus1__Alu	2	chr9	42982562	42982710	B1_Mus1	Alu	0.201003	0.0452381	0.0533334	0.0366667	1	0	1	0
chr9__59463090__59463218__SINE__B3A__B2	2	chr9	59463090	59463218	B3A	B2	0.0714286	0	0.0994317	0.0713383	1	0	1	0
chr9__65553845__65554015__SINE__B1_Mur2__Alu	2	chr9	65553845	65554015	B1_Mur2	Alu	0.0582844	0.0518301	0.0932331	0.0134952	1	0	1	0
chr9__66583915__66584057__SINE__B1_Mus1__Alu	2	chr9	66583915	66584057	B1_Mus1	Alu	0.363636	0.166667	0.333333	0.111111	1	0	1	0
chr9__72054979__72055151__SINE__B3__B2	2	chr9	72054979	72055151	B3	B2	0.103896	0.0205128	0.189342	0.0638889	1	0	1	0
chrX__13162730__13162863__SINE__B1_Mur4__Alu	2	chrX	13162730	13162863	B1_Mur4	Alu	0.314285	0.166666	0.25	0.125	1	0	1	0
