# Supplementary material for: ADAR1 RNA editing regulates endothelial cell functions via the MDA-5 RNA sensing signaling pathway
Source: Life Sci Alliance. 2021 Dec 30;5(3):e202101191. doi: 10.26508/lsa.202101191 (PMC8739526; doi:10.26508/lsa.202101191)
Supplement: Supplementary file 4 [file LSA-2021-01191_TableS4.xlsx]

## Sheet: check_site
GeneName	Potential editing sites					Editing read counts and alternative rate
geneName	chr	pos	ref	alt	geneStrand	EC1-CON A Count	EC1-CON G Count	EC1-CON Rate	EC2-CON A Count	EC2-CON G Count	EC2-CON Rate	EC1-TM A Count	EC1-TM G Count	EC1-TM Rate	EC2-TM A Count	EC2-TM G Count	EC2-TM Rate	gene Start	gene End	Anno
Ctss	chr3	95530739	A	G	+	0	0	0	0	1	1	0	1	1	0	1	1	95529560	95538721	intron
Ctss	chr3	95548497	A	G	+	0	0	0	0	0	0	0	2	1	0	0	0	95546961	95550053	intron
Ctss	chr3	95548579	A	G	+	1	2	0.666667	0	0	0	0	0	0	0	0	0	95546961	95550053	intron
Ctss	chr3	95549682	A	G	+	0	1	1	0	0	0	0	0	0	0	0	0	95546961	95550053	intron
Ctss	chr3	95549720	A	G	+	0	1	1	0	0	0	0	0	0	0	0	0	95546961	95550053	intron
Ctss	chr3	95552445	A	G	+	0	0	0	0	0	0	0	1	1	0	0	0	95550155	95556086	intron
Ctss	chr3	95553463	A	G	+	0	1	1	0	0	0	0	0	0	0	0	0	95550155	95556086	intron
Ctss	chr3	95553477	A	G	+	0	1	1	0	0	0	0	0	0	0	0	0	95550155	95556086	intron
Flna	chrX	74226862	T	C	-	335	510	0.60355	546	569	0.510314	514	376	0.422472	0	0	0	74226861	74226976	exon
Flna	chrX	74222796	T	C	-	0	0	0	0	0	0	20	1	0.047619	0	0	0	74222461	74223461	downstream
Flna	chrX	74223136	T	C	-	0	0	0	8	1	0.111111	0	0	0	0	0	0	74222461	74223461	downstream
Flna	chrX	74223181	T	C	-	0	0	0	20	1	0.047619	0	0	0	0	0	0	74222461	74223461	downstream
Flna	chrX	74223398	T	C	-	0	0	0	0	0	0	0	0	0	29	2	0.0645161	74222461	74223461	downstream
Flna	chrX	74223400	T	C	-	0	0	0	0	0	0	0	0	0	30	2	0.0625	74222461	74223461	downstream
Flna	chrX	74223457	T	C	-	21	1	0.0454545	0	0	0	0	0	0	0	0	0	74222461	74223461	downstream
Flna	chrX	74223493	T	C	-	0	0	0	733	1	0.0013624	0	0	0	0	0	0	74223461	74223793	3 UTR
Flna	chrX	74223496	T	C	-	679	1	0.00147059	0	0	0	814	1	0.00122699	0	0	0	74223461	74223793	3 UTR
Flna	chrX	74223500	T	C	-	0	0	0	0	0	0	0	0	0	1626	1	0.000614628	74223461	74223793	3 UTR
Flna	chrX	74223520	T	C	-	0	0	0	0	0	0	1460	1	0.000684463	0	0	0	74223461	74223793	3 UTR
Flna	chrX	74223523	T	C	-	0	0	0	1700	1	0.000587889	1466	1	0.000681663	0	0	0	74223461	74223793	3 UTR
Flna	chrX	74223536	T	C	-	0	0	0	0	0	0	0	0	0	2630	1	0.000380084	74223461	74223793	3 UTR
Flna	chrX	74223537	T	C	-	1384	1	0.000722022	0	0	0	0	0	0	0	0	0	74223461	74223793	3 UTR
Flna	chrX	74223563	T	C	-	0	0	0	0	0	0	0	0	0	2777	1	0.000359971	74223461	74223793	3 UTR
Flna	chrX	74223568	T	C	-	0	0	0	0	0	0	1551	1	0.00064433	2691	2	0.000742666	74223461	74223793	3 UTR
Flna	chrX	74223582	T	C	-	1382	1	0.000723066	1891	1	0.000528541	1498	1	0.000667111	2702	3	0.00110906	74223461	74223793	3 UTR
Flna	chrX	74223586	T	C	-	0	0	0	1919	1	0.000520833	0	0	0	0	0	0	74223461	74223793	3 UTR
Flna	chrX	74223588	T	C	-	0	0	0	0	0	0	1493	1	0.000669344	0	0	0	74223461	74223793	3 UTR
Flna	chrX	74223645	T	C	-	0	0	0	0	0	0	0	0	0	2744	1	0.000364299	74223461	74223793	3 UTR
Flna	chrX	74223661	T	C	-	0	0	0	0	0	0	0	0	0	3071	1	0.000325521	74223461	74223793	3 UTR
Flna	chrX	74223664	T	C	-	0	0	0	0	0	0	1654	1	0.00060423	0	0	0	74223461	74223793	3 UTR
Flna	chrX	74223688	T	C	-	0	0	0	0	0	0	0	0	0	3456	2	0.000578369	74223461	74223793	3 UTR
Flna	chrX	74223702	T	C	-	0	0	0	2315	1	0.000431779	0	0	0	0	0	0	74223461	74223793	3 UTR
Flna	chrX	74223708	T	C	-	1790	1	0.000558347	0	0	0	1782	1	0.000560852	0	0	0	74223461	74223793	3 UTR
Flna	chrX	74223711	T	C	-	0	0	0	0	0	0	0	0	0	3653	1	0.000273673	74223461	74223793	3 UTR
Flna	chrX	74223718	T	C	-	0	0	0	0	0	0	0	0	0	3521	1	0.00028393	74223461	74223793	3 UTR
Flna	chrX	74223747	T	C	-	0	0	0	2237	1	0.000446828	0	0	0	0	0	0	74223461	74223793	3 UTR
Flna	chrX	74223754	T	C	-	0	0	0	0	0	0	0	0	0	3437	1	0.000290867	74223461	74223793	3 UTR
Flna	chrX	74223761	T	C	-	0	0	0	2106	1	0.000474608	0	0	0	3320	1	0.000301114	74223461	74223793	3 UTR
Flna	chrX	74223778	T	C	-	0	0	0	0	0	0	0	0	0	3147	1	0.000317662	74223461	74223793	3 UTR
Flna	chrX	74223782	T	C	-	1399	1	0.000714286	0	0	0	0	0	0	0	0	0	74223461	74223793	3 UTR
Flna	chrX	74223816	T	C	-	0	0	0	0	0	0	0	0	0	2655	1	0.000376506	74223793	74223977	exon
Flna	chrX	74223820	T	C	-	1295	1	0.000771605	0	0	0	0	0	0	0	0	0	74223793	74223977	exon
Flna	chrX	74223825	T	C	-	0	0	0	1818	1	0.000549753	0	0	0	0	0	0	74223793	74223977	exon
Flna	chrX	74223842	T	C	-	0	0	0	0	0	0	1334	1	0.000749064	0	0	0	74223793	74223977	exon
Flna	chrX	74223843	T	C	-	1270	1	0.000786782	0	0	0	0	0	0	0	0	0	74223793	74223977	exon
Flna	chrX	74223853	T	C	-	0	0	0	0	0	0	0	0	0	2448	1	0.00040833	74223793	74223977	exon
Flna	chrX	74223855	T	C	-	0	0	0	0	0	0	0	0	0	2446	1	0.000408664	74223793	74223977	exon
Flna	chrX	74223860	T	C	-	1194	1	0.00083682	1598	1	0.000625391	0	0	0	0	0	0	74223793	74223977	exon
Flna	chrX	74223865	T	C	-	1127	2	0.00177148	0	0	0	0	0	0	0	0	0	74223793	74223977	exon
Flna	chrX	74223866	T	C	-	0	0	0	0	0	0	0	0	0	2150	1	0.0004649	74223793	74223977	exon
Flna	chrX	74223867	T	C	-	1115	1	0.000896057	0	0	0	0	0	0	0	0	0	74223793	74223977	exon
Flna	chrX	74223873	T	C	-	0	0	0	0	0	0	0	0	0	2131	1	0.000469043	74223793	74223977	exon
Flna	chrX	74223903	T	C	-	0	0	0	0	0	0	0	0	0	1842	1	0.000542594	74223793	74223977	exon
Flna	chrX	74223911	T	C	-	0	0	0	1343	1	0.000744048	0	0	0	0	0	0	74223793	74223977	exon
Flna	chrX	74223926	T	C	-	0	0	0	1270	1	0.000786782	0	0	0	0	0	0	74223793	74223977	exon
Flna	chrX	74223937	T	C	-	0	0	0	0	0	0	0	0	0	1910	1	0.000523286	74223793	74223977	exon
Flna	chrX	74223943	T	C	-	0	0	0	1244	1	0.000803213	972	1	0.00102775	1922	2	0.0010395	74223793	74223977	exon
Flna	chrX	74223950	T	C	-	922	1	0.00108342	0	0	0	0	0	0	0	0	0	74223793	74223977	exon
Flna	chrX	74224044	T	C	-	0	0	0	21	1	0.0454545	0	0	0	0	0	0	74223977	74224752	intron
Flna	chrX	74224753	T	C	-	786	4	0.00506329	1006	1	0.000993049	0	0	0	0	0	0	74224752	74224955	exon
Flna	chrX	74224761	T	C	-	0	0	0	1049	1	0.000952381	0	0	0	0	0	0	74224752	74224955	exon
Flna	chrX	74224773	T	C	-	0	0	0	0	0	0	872	2	0.00228833	0	0	0	74224752	74224955	exon
Flna	chrX	74224792	T	C	-	758	1	0.00131752	0	0	0	796	1	0.00125471	0	0	0	74224752	74224955	exon
Flna	chrX	74224820	T	C	-	0	0	0	0	0	0	713	1	0.00140056	0	0	0	74224752	74224955	exon
Flna	chrX	74224828	T	C	-	0	0	0	0	0	0	768	1	0.00130039	0	0	0	74224752	74224955	exon
Flna	chrX	74224852	T	C	-	689	1	0.00144928	0	0	0	0	0	0	1266	1	0.000789266	74224752	74224955	exon
Flna	chrX	74224858	T	C	-	807	3	0.0037037	1005	2	0.0019861	869	4	0.0045819	0	0	0	74224752	74224955	exon
Flna	chrX	74224863	T	C	-	0	0	0	0	0	0	839	1	0.00119048	0	0	0	74224752	74224955	exon
Flna	chrX	74224868	T	C	-	0	0	0	0	0	0	0	0	0	1446	1	0.000691085	74224752	74224955	exon
Flna	chrX	74224893	T	C	-	0	0	0	0	0	0	1168	1	0.000855432	0	0	0	74224752	74224955	exon
Flna	chrX	74224918	T	C	-	0	0	0	0	0	0	1138	1	0.000877963	0	0	0	74224752	74224955	exon
Flna	chrX	74224922	T	C	-	0	0	0	0	0	0	1200	1	0.000832639	0	0	0	74224752	74224955	exon
Flna	chrX	74224932	T	C	-	0	0	0	1303	1	0.000766871	1254	1	0.000796813	2029	1	0.000492611	74224752	74224955	exon
Flna	chrX	74224934	T	C	-	1097	1	0.000910747	0	0	0	0	0	0	0	0	0	74224752	74224955	exon
Flna	chrX	74224937	T	C	-	0	0	0	0	0	0	1351	1	0.000739645	0	0	0	74224752	74224955	exon
Flna	chrX	74224938	T	C	-	0	0	0	1445	1	0.000691563	0	0	0	0	0	0	74224752	74224955	exon
Flna	chrX	74225041	T	C	-	0	0	0	0	0	0	1344	1	0.000743494	0	0	0	74225040	74225258	exon
Flna	chrX	74225048	T	C	-	0	0	0	0	0	0	1365	1	0.000732064	0	0	0	74225040	74225258	exon
Flna	chrX	74225097	T	C	-	0	0	0	0	0	0	0	0	0	2247	1	0.00044484	74225040	74225258	exon
Flna	chrX	74225112	T	C	-	1117	1	0.000894454	0	0	0	0	0	0	0	0	0	74225040	74225258	exon
Flna	chrX	74225136	T	C	-	0	0	0	0	0	0	0	0	0	1822	1	0.000548546	74225040	74225258	exon
Flna	chrX	74225162	T	C	-	0	0	0	0	0	0	1125	1	0.000888099	0	0	0	74225040	74225258	exon
Flna	chrX	74225172	T	C	-	0	0	0	0	0	0	0	0	0	1742	1	0.000573723	74225040	74225258	exon
Flna	chrX	74225175	T	C	-	1003	1	0.000996016	0	0	0	0	0	0	0	0	0	74225040	74225258	exon
Flna	chrX	74225225	T	C	-	0	0	0	0	0	0	0	0	0	1261	1	0.000792393	74225040	74225258	exon
Flna	chrX	74225230	T	C	-	0	0	0	947	1	0.00105485	0	0	0	0	0	0	74225040	74225258	exon
Flna	chrX	74225246	T	C	-	0	0	0	0	0	0	0	0	0	1159	2	0.00172265	74225040	74225258	exon
Flna	chrX	74225248	T	C	-	0	0	0	861	1	0.00116009	0	0	0	0	0	0	74225040	74225258	exon
Flna	chrX	74225399	T	C	-	0	0	0	0	0	0	775	1	0.00128866	0	0	0	74225398	74225574	exon
Flna	chrX	74225401	T	C	-	0	0	0	0	0	0	0	0	0	1314	1	0.000760456	74225398	74225574	exon
Flna	chrX	74225420	T	C	-	0	0	0	0	0	0	710	1	0.00140647	0	0	0	74225398	74225574	exon
Flna	chrX	74225444	T	C	-	0	0	0	0	0	0	797	1	0.00125313	0	0	0	74225398	74225574	exon
Flna	chrX	74225453	T	C	-	892	1	0.00111982	0	0	0	0	0	0	0	0	0	74225398	74225574	exon
Flna	chrX	74225466	T	C	-	884	1	0.00112994	1039	2	0.00192123	929	3	0.00321888	0	0	0	74225398	74225574	exon
Flna	chrX	74225479	T	C	-	945	1	0.00105708	0	0	0	0	0	0	0	0	0	74225398	74225574	exon
Flna	chrX	74225481	T	C	-	0	0	0	1188	1	0.000841043	0	0	0	0	0	0	74225398	74225574	exon
Flna	chrX	74225506	T	C	-	0	0	0	0	0	0	1066	1	0.000937207	0	0	0	74225398	74225574	exon
Flna	chrX	74225541	T	C	-	0	0	0	0	0	0	1098	1	0.000909918	0	0	0	74225398	74225574	exon
Flna	chrX	74225544	T	C	-	1068	1	0.000935454	0	0	0	0	0	0	0	0	0	74225398	74225574	exon
Flna	chrX	74225546	T	C	-	0	0	0	0	0	0	0	0	0	2330	1	0.000429	74225398	74225574	exon
Flna	chrX	74225549	T	C	-	0	0	0	0	0	0	1291	1	0.000773994	0	0	0	74225398	74225574	exon
Flna	chrX	74225554	T	C	-	0	0	0	1818	3	0.00164745	0	0	0	0	0	0	74225398	74225574	exon
Flna	chrX	74226204	T	C	-	0	0	0	0	0	0	1297	1	0.000770416	0	0	0	74226202	74226334	exon
Flna	chrX	74226242	T	C	-	0	0	0	1488	2	0.00134228	0	0	0	0	0	0	74226202	74226334	exon
Flna	chrX	74226258	T	C	-	0	0	0	0	0	0	1273	1	0.000784929	0	0	0	74226202	74226334	exon
Flna	chrX	74226259	T	C	-	0	0	0	0	0	0	0	0	0	2633	2	0.000759013	74226202	74226334	exon
Flna	chrX	74226264	T	C	-	0	0	0	1531	2	0.00130463	0	0	0	0	0	0	74226202	74226334	exon
Flna	chrX	74226269	T	C	-	0	0	0	0	0	0	0	0	0	2476	1	0.000403714	74226202	74226334	exon
Flna	chrX	74226276	T	C	-	0	0	0	0	0	0	966	1	0.00103413	0	0	0	74226202	74226334	exon
Flna	chrX	74226281	T	C	-	0	0	0	0	0	0	912	1	0.00109529	0	0	0	74226202	74226334	exon
Flna	chrX	74226292	T	C	-	0	0	0	966	1	0.00103413	0	0	0	0	0	0	74226202	74226334	exon
Flna	chrX	74226305	T	C	-	0	0	0	0	0	0	871	1	0.00114679	0	0	0	74226202	74226334	exon
Flna	chrX	74226308	T	C	-	0	0	0	1056	1	0.000946074	0	0	0	0	0	0	74226202	74226334	exon
Flna	chrX	74226316	T	C	-	961	1	0.0010395	0	0	0	0	0	0	0	0	0	74226202	74226334	exon
Flna	chrX	74226329	T	C	-	0	0	0	0	0	0	0	0	0	1906	1	0.000524384	74226202	74226334	exon
Flna	chrX	74226336	T	C	-	0	0	0	0	0	0	296	1	0.003367	0	0	0	74226334	74226861	intron
Flna	chrX	74226344	T	C	-	280	1	0.00355872	0	0	0	0	0	0	0	0	0	74226334	74226861	intron
Flna	chrX	74226425	T	C	-	0	0	0	0	0	0	0	0	0	470	2	0.00423729	74226334	74226861	intron
Flna	chrX	74226459	T	C	-	245	1	0.00406504	0	0	0	0	0	0	0	0	0	74226334	74226861	intron
Flna	chrX	74226503	T	C	-	0	0	0	0	0	0	0	0	0	273	1	0.00364964	74226334	74226861	intron
Flna	chrX	74226537	T	C	-	195	1	0.00510204	0	0	0	0	0	0	0	0	0	74226334	74226861	intron
Flna	chrX	74226596	T	C	-	0	0	0	0	0	0	0	0	0	275	3	0.0107914	74226334	74226861	intron
Flna	chrX	74226599	T	C	-	0	0	0	0	0	0	0	0	0	284	1	0.00350877	74226334	74226861	intron
Flna	chrX	74226639	T	C	-	0	0	0	168	1	0.00591716	0	0	0	0	0	0	74226334	74226861	intron
Flna	chrX	74226648	T	C	-	185	2	0.0106952	168	2	0.0117647	222	2	0.00892857	0	0	0	74226334	74226861	intron
Flna	chrX	74226649	T	C	-	141	42	0.229508	122	44	0.26506	189	32	0.144796	242	42	0.147887	74226334	74226861	intron
Flna	chrX	74226650	T	C	-	35	149	0.809783	34	131	0.793939	47	174	0.78733	101	184	0.645614	74226334	74226861	intron
Flna	chrX	74226694	T	C	-	0	0	0	132	1	0.0075188	0	0	0	0	0	0	74226334	74226861	intron
Flna	chrX	74226706	T	C	-	0	0	0	130	1	0.00763359	0	0	0	0	0	0	74226334	74226861	intron
Flna	chrX	74226790	T	C	-	105	1	0.00943396	0	0	0	0	0	0	0	0	0	74226334	74226861	intron
Flna	chrX	74226813	T	C	-	127	1	0.0078125	0	0	0	0	0	0	0	0	0	74226334	74226861	intron
Flna	chrX	74226849	T	C	-	168	1	0.00591716	123	1	0.00806452	0	0	0	0	0	0	74226334	74226861	intron
Flna	chrX	74226857	T	C	-	0	0	0	0	0	0	0	0	0	180	2	0.010989	74226334	74226861	intron
Flna	chrX	74226869	T	C	-	938	2	0.00212766	0	0	0	0	0	0	0	0	0	74226861	74226976	exon
Flna	chrX	74226892	T	C	-	0	0	0	0	0	0	1243	1	0.000803859	2223	1	0.00044964	74226861	74226976	exon
Flna	chrX	74226931	T	C	-	0	0	0	0	0	0	1274	1	0.000784314	0	0	0	74226861	74226976	exon
Flna	chrX	74226936	T	C	-	0	0	0	1476	1	0.000677048	0	0	0	0	0	0	74226861	74226976	exon
Flna	chrX	74226938	T	C	-	0	0	0	1445	1	0.000691563	0	0	0	0	0	0	74226861	74226976	exon
Flna	chrX	74226946	T	C	-	1311	3	0.00228311	1664	2	0.00120048	0	0	0	0	0	0	74226861	74226976	exon
Flna	chrX	74226967	T	C	-	1256	1	0.000795545	0	0	0	0	0	0	2430	1	0.000411353	74226861	74226976	exon
Flna	chrX	74226970	T	C	-	1225	1	0.000815661	1649	2	0.00121139	0	0	0	0	0	0	74226861	74226976	exon
Flna	chrX	74227084	T	C	-	0	0	0	0	0	0	0	0	0	34	1	0.0285714	74226976	74227198	intron
Flna	chrX	74227199	T	C	-	0	0	0	0	0	0	1427	1	0.00070028	0	0	0	74227198	74227335	exon
Flna	chrX	74227203	T	C	-	0	0	0	1679	1	0.000595238	0	0	0	0	0	0	74227198	74227335	exon
Flna	chrX	74227236	T	C	-	0	0	0	0	0	0	1495	2	0.00133601	0	0	0	74227198	74227335	exon
Flna	chrX	74227260	T	C	-	0	0	0	0	0	0	0	0	0	2466	2	0.000810373	74227198	74227335	exon
Flna	chrX	74227277	T	C	-	0	0	0	0	0	0	1259	1	0.000793651	0	0	0	74227198	74227335	exon
Flna	chrX	74227298	T	C	-	0	0	0	1327	2	0.00150489	0	0	0	0	0	0	74227198	74227335	exon
Flna	chrX	74227311	T	C	-	1015	1	0.000984252	0	0	0	0	0	0	1847	1	0.000541126	74227198	74227335	exon
Flna	chrX	74227332	T	C	-	0	0	0	0	0	0	987	1	0.00101215	0	0	0	74227198	74227335	exon
Flna	chrX	74227424	T	C	-	0	0	0	107	1	0.00925926	96	1	0.0103093	0	0	0	74227335	74227491	intron
Flna	chrX	74227492	T	C	-	0	0	0	0	0	0	0	0	0	1521	2	0.0013132	74227491	74227757	exon
Flna	chrX	74227498	T	C	-	0	0	0	0	0	0	0	0	0	1494	1	0.000668896	74227491	74227757	exon
Flna	chrX	74227512	T	C	-	0	0	0	1017	1	0.000982318	0	0	0	1431	2	0.00139567	74227491	74227757	exon
Flna	chrX	74227516	T	C	-	888	1	0.00112486	0	0	0	913	1	0.00109409	1450	1	0.00068918	74227491	74227757	exon
Flna	chrX	74227541	T	C	-	0	0	0	0	0	0	0	0	0	1854	3	0.00161551	74227491	74227757	exon
Flna	chrX	74227542	T	C	-	0	0	0	0	0	0	1122	2	0.00177936	0	0	0	74227491	74227757	exon
Flna	chrX	74227544	T	C	-	0	0	0	0	0	0	0	0	0	1892	1	0.000528262	74227491	74227757	exon
Flna	chrX	74227556	T	C	-	1522	1	0.000656599	1828	2	0.0010929	1527	2	0.00130804	2677	4	0.00149198	74227491	74227757	exon
Flna	chrX	74227580	T	C	-	0	0	0	2212	2	0.000903342	0	0	0	0	0	0	74227491	74227757	exon
Flna	chrX	74227590	T	C	-	1703	1	0.000586854	0	0	0	0	0	0	0	0	0	74227491	74227757	exon
Flna	chrX	74227597	T	C	-	1713	1	0.000583431	0	0	0	0	0	0	0	0	0	74227491	74227757	exon
Flna	chrX	74227604	T	C	-	0	0	0	2220	1	0.000450248	1727	1	0.000578704	0	0	0	74227491	74227757	exon
Flna	chrX	74227610	T	C	-	0	0	0	0	0	0	1780	7	0.00391718	0	0	0	74227491	74227757	exon
Flna	chrX	74227611	T	C	-	1842	1	0.000542594	0	0	0	1808	2	0.00110497	0	0	0	74227491	74227757	exon
Flna	chrX	74227617	T	C	-	0	0	0	0	0	0	0	0	0	3650	1	0.000273898	74227491	74227757	exon
Flna	chrX	74227623	T	C	-	0	0	0	0	0	0	0	0	0	3723	1	0.000268528	74227491	74227757	exon
Flna	chrX	74227627	T	C	-	0	0	0	2459	1	0.000406504	0	0	0	0	0	0	74227491	74227757	exon
Flna	chrX	74227629	T	C	-	0	0	0	0	0	0	1849	2	0.0010805	0	0	0	74227491	74227757	exon
Flna	chrX	74227631	T	C	-	0	0	0	0	0	0	1852	1	0.000539665	0	0	0	74227491	74227757	exon
Flna	chrX	74227641	T	C	-	1731	1	0.000577367	2340	1	0.000427168	0	0	0	3559	1	0.000280899	74227491	74227757	exon
Flna	chrX	74227667	T	C	-	0	0	0	0	0	0	0	0	0	2711	1	0.000368732	74227491	74227757	exon
Flna	chrX	74227673	T	C	-	1409	1	0.00070922	0	0	0	0	0	0	0	0	0	74227491	74227757	exon
Flna	chrX	74227677	T	C	-	0	0	0	0	0	0	0	0	0	2698	1	0.000370508	74227491	74227757	exon
Flna	chrX	74227681	T	C	-	0	0	0	0	0	0	1471	1	0.000679348	0	0	0	74227491	74227757	exon
Flna	chrX	74227684	T	C	-	1511	1	0.000661376	0	0	0	0	0	0	0	0	0	74227491	74227757	exon
Flna	chrX	74227694	T	C	-	1508	1	0.000662691	0	0	0	0	0	0	0	0	0	74227491	74227757	exon
Flna	chrX	74227696	T	C	-	1523	1	0.000656168	0	0	0	0	0	0	0	0	0	74227491	74227757	exon
Flna	chrX	74227709	T	C	-	0	0	0	1886	1	0.000529942	0	0	0	0	0	0	74227491	74227757	exon
Flna	chrX	74227710	T	C	-	0	0	0	0	0	0	1387	1	0.000720461	0	0	0	74227491	74227757	exon
Flna	chrX	74227714	T	C	-	1353	2	0.00147601	1789	1	0.000558659	0	0	0	0	0	0	74227491	74227757	exon
Flna	chrX	74227717	T	C	-	1353	1	0.000738552	0	0	0	0	0	0	0	0	0	74227491	74227757	exon
Flna	chrX	74227722	T	C	-	1476	1	0.000677048	1851	2	0.00107933	1434	2	0.00139276	0	0	0	74227491	74227757	exon
Flna	chrX	74227725	T	C	-	0	0	0	1719	1	0.000581395	0	0	0	0	0	0	74227491	74227757	exon
Flna	chrX	74227735	T	C	-	0	0	0	0	0	0	1483	1	0.000673854	2971	1	0.000336474	74227491	74227757	exon
Flna	chrX	74227737	T	C	-	1503	1	0.000664894	0	0	0	0	0	0	0	0	0	74227491	74227757	exon
Flna	chrX	74227740	T	C	-	1486	1	0.000672495	0	0	0	0	0	0	0	0	0	74227491	74227757	exon
Flna	chrX	74227752	T	C	-	0	0	0	0	0	0	0	0	0	3408	1	0.000293341	74227491	74227757	exon
Flna	chrX	74227757	T	C	-	0	0	0	0	0	0	0	0	0	3499	1	0.000285714	74227757	74227852	intron
Flna	chrX	74227845	T	C	-	0	0	0	0	0	0	0	0	0	22	1	0.0434783	74227757	74227852	intron
Flna	chrX	74227861	T	C	-	1723	2	0.00115942	2307	1	0.000433276	0	0	0	0	0	0	74227852	74227974	exon
Flna	chrX	74227867	T	C	-	1822	1	0.000548546	0	0	0	1840	1	0.000543183	0	0	0	74227852	74227974	exon
Flna	chrX	74227872	T	C	-	0	0	0	0	0	0	0	0	0	3559	1	0.000280899	74227852	74227974	exon
Flna	chrX	74227882	T	C	-	1711	1	0.000584112	0	0	0	0	0	0	0	0	0	74227852	74227974	exon
Flna	chrX	74227890	T	C	-	0	0	0	0	0	0	0	0	0	3347	1	0.000298686	74227852	74227974	exon
Flna	chrX	74227915	T	C	-	0	0	0	0	0	0	0	0	0	3534	4	0.00113058	74227852	74227974	exon
Flna	chrX	74227921	T	C	-	1792	1	0.000557724	0	0	0	0	0	0	3647	1	0.000274123	74227852	74227974	exon
Flna	chrX	74227932	T	C	-	0	0	0	0	0	0	1640	1	0.000609385	0	0	0	74227852	74227974	exon
Flna	chrX	74227933	T	C	-	0	0	0	2060	1	0.000485201	0	0	0	0	0	0	74227852	74227974	exon
Flna	chrX	74227944	T	C	-	0	0	0	0	0	0	0	0	0	3113	1	0.00032113	74227852	74227974	exon
Flna	chrX	74227949	T	C	-	0	0	0	0	1785	1	1	1398	0.999285	1	2806	0.999644	74227852	74227974	exon
Flna	chrX	74227972	T	C	-	0	0	0	1683	1	0.000593824	0	0	0	0	0	0	74227852	74227974	exon
Flna	chrX	74228100	T	C	-	0	0	0	0	0	0	0	0	0	2560	2	0.00078064	74228086	74228238	exon
Flna	chrX	74228110	T	C	-	0	0	0	0	0	0	1279	2	0.00156128	0	0	0	74228086	74228238	exon
Flna	chrX	74228136	T	C	-	0	0	0	0	0	0	0	0	0	2904	2	0.000688231	74228086	74228238	exon
Flna	chrX	74228158	T	C	-	0	0	0	0	0	0	1427	1	0.00070028	2918	1	0.000342583	74228086	74228238	exon
Flna	chrX	74228164	T	C	-	0	0	0	1942	1	0.000514668	0	0	0	0	0	0	74228086	74228238	exon
Flna	chrX	74228169	T	C	-	0	0	0	1958	1	0.000510465	1482	1	0.000674309	0	0	0	74228086	74228238	exon
Flna	chrX	74228178	T	C	-	1280	1	0.00078064	0	0	0	0	0	0	0	0	0	74228086	74228238	exon
Flna	chrX	74228181	T	C	-	1326	1	0.00075358	1940	1	0.000515198	0	0	0	0	0	0	74228086	74228238	exon
Flna	chrX	74228183	T	C	-	0	0	0	0	0	0	1485	1	0.000672948	2953	3	0.00101488	74228086	74228238	exon
Flna	chrX	74228187	T	C	-	1320	1	0.000757002	0	0	0	0	0	0	2949	1	0.000338983	74228086	74228238	exon
Flna	chrX	74228203	T	C	-	0	0	0	0	0	0	1453	1	0.000687758	0	0	0	74228086	74228238	exon
Flna	chrX	74228211	T	C	-	0	0	0	0	0	0	1526	1	0.000654879	0	0	0	74228086	74228238	exon
Flna	chrX	74228322	T	C	-	0	0	0	1531	3	0.00195567	0	0	0	0	0	0	74228321	74228524	exon
Flna	chrX	74228330	T	C	-	1073	1	0.000931099	0	0	0	0	0	0	0	0	0	74228321	74228524	exon
Flna	chrX	74228339	T	C	-	0	0	0	0	0	0	0	0	0	2367	2	0.000844238	74228321	74228524	exon
Flna	chrX	74228356	T	C	-	0	0	0	1583	1	0.000631313	0	0	0	0	0	0	74228321	74228524	exon
Flna	chrX	74228396	T	C	-	0	0	0	0	0	0	0	0	0	2039	1	0.000490196	74228321	74228524	exon
Flna	chrX	74228405	T	C	-	0	0	0	0	0	0	1176	1	0.000849618	0	0	0	74228321	74228524	exon
Flna	chrX	74228410	T	C	-	1175	1	0.00085034	0	0	0	0	0	0	0	0	0	74228321	74228524	exon
Flna	chrX	74228429	T	C	-	1395	1	0.000716332	0	0	0	0	0	0	0	0	0	74228321	74228524	exon
Flna	chrX	74228450	T	C	-	1553	1	0.000643501	1957	2	0.00102093	0	0	0	2876	1	0.000347584	74228321	74228524	exon
Flna	chrX	74228454	T	C	-	1558	1	0.000641437	0	0	0	0	0	0	0	0	0	74228321	74228524	exon
Flna	chrX	74228461	T	C	-	0	0	0	0	0	0	1629	1	0.000613497	2894	1	0.000345423	74228321	74228524	exon
Flna	chrX	74228473	T	C	-	0	0	0	0	0	0	1767	1	0.000565611	3091	1	0.000323415	74228321	74228524	exon
Flna	chrX	74228484	T	C	-	0	0	0	2182	1	0.000458085	0	0	0	0	0	0	74228321	74228524	exon
Flna	chrX	74228491	T	C	-	0	0	0	0	0	0	0	0	0	3215	2	0.000621697	74228321	74228524	exon
Flna	chrX	74228494	T	C	-	0	0	0	0	0	0	0	0	0	3213	1	0.000311139	74228321	74228524	exon
Flna	chrX	74228522	T	C	-	0	0	0	0	0	0	0	0	0	2605	1	0.00038373	74228321	74228524	exon
Flna	chrX	74228783	T	C	-	0	0	0	0	0	0	1031	1	0.000968992	0	0	0	74228760	74228921	exon
Flna	chrX	74228784	T	C	-	900	1	0.00110988	0	0	0	0	0	0	0	0	0	74228760	74228921	exon
Flna	chrX	74228797	T	C	-	0	0	0	0	0	0	0	0	0	1535	1	0.000651042	74228760	74228921	exon
Flna	chrX	74228826	T	C	-	0	0	0	0	0	0	0	0	0	1416	1	0.000705716	74228760	74228921	exon
Flna	chrX	74228830	T	C	-	0	0	0	0	0	0	0	0	0	1503	1	0.000664894	74228760	74228921	exon
Flna	chrX	74228859	T	C	-	0	0	0	1434	1	0.000696864	0	0	0	0	0	0	74228760	74228921	exon
Flna	chrX	74228871	T	C	-	0	0	0	0	0	0	1483	2	0.0013468	0	0	0	74228760	74228921	exon
Flna	chrX	74228941	T	C	-	0	0	0	0	0	0	42	1	0.0232558	0	0	0	74228921	74229019	intron
Flna	chrX	74229060	T	C	-	947	1	0.00105485	0	0	0	0	0	0	0	0	0	74229019	74229192	exon
Flna	chrX	74229079	T	C	-	0	0	0	1291	1	0.000773994	0	0	0	0	0	0	74229019	74229192	exon
Flna	chrX	74229108	T	C	-	0	0	0	0	0	0	0	0	0	1849	1	0.000540541	74229019	74229192	exon
Flna	chrX	74229122	T	C	-	0	0	0	0	0	0	0	0	0	1692	1	0.000590667	74229019	74229192	exon
Flna	chrX	74229125	T	C	-	0	0	0	0	0	0	0	0	0	1796	1	0.000556483	74229019	74229192	exon
Flna	chrX	74229129	T	C	-	821	1	0.00121655	0	0	0	0	0	0	0	0	0	74229019	74229192	exon
Flna	chrX	74229322	T	C	-	0	0	0	0	0	0	0	0	0	82	1	0.0120482	74229192	74229381	intron
Flna	chrX	74229383	T	C	-	0	0	0	1053	1	0.000948767	0	0	0	0	0	0	74229381	74229509	exon
Flna	chrX	74229385	T	C	-	0	0	0	1038	1	0.000962464	0	0	0	0	0	0	74229381	74229509	exon
Flna	chrX	74229396	T	C	-	760	1	0.00131406	0	0	0	0	0	0	0	0	0	74229381	74229509	exon
Flna	chrX	74229399	T	C	-	0	0	0	1029	1	0.000970874	0	0	0	0	0	0	74229381	74229509	exon
Flna	chrX	74229465	T	C	-	0	0	0	0	0	0	0	0	0	1942	1	0.000514668	74229381	74229509	exon
Flna	chrX	74229482	T	C	-	1212	1	0.000824402	0	0	0	0	0	0	0	0	0	74229381	74229509	exon
Flna	chrX	74229497	T	C	-	0	0	0	0	0	0	1300	1	0.00076864	0	0	0	74229381	74229509	exon
Flna	chrX	74229508	T	C	-	1325	1	0.000754148	0	0	0	1435	2	0.00139179	0	0	0	74229381	74229509	exon
Flna	chrX	74229827	T	C	-	1385	2	0.00144196	0	0	0	1523	1	0.000656168	0	0	0	74229826	74229966	exon
Flna	chrX	74229834	T	C	-	0	0	0	1833	2	0.00108992	0	0	0	0	0	0	74229826	74229966	exon
Flna	chrX	74229838	T	C	-	1377	1	0.000725689	0	0	0	1486	1	0.000672495	0	0	0	74229826	74229966	exon
Flna	chrX	74229859	T	C	-	0	0	0	0	0	0	0	0	0	3194	2	0.000625782	74229826	74229966	exon
Flna	chrX	74229861	T	C	-	0	0	0	0	0	0	1672	1	0.000597729	3255	1	0.000307125	74229826	74229966	exon
Flna	chrX	74229875	T	C	-	0	0	0	0	0	0	0	0	0	3154	1	0.000316957	74229826	74229966	exon
Flna	chrX	74229876	T	C	-	0	0	0	1957	1	0.000510725	0	0	0	0	0	0	74229826	74229966	exon
Flna	chrX	74229880	T	C	-	0	0	0	0	0	0	1674	1	0.000597015	0	0	0	74229826	74229966	exon
Flna	chrX	74229893	T	C	-	0	0	0	0	0	0	1462	1	0.000683527	0	0	0	74229826	74229966	exon
Flna	chrX	74229904	T	C	-	0	0	0	0	0	0	1505	1	0.000664011	0	0	0	74229826	74229966	exon
Flna	chrX	74229911	T	C	-	0	0	0	1786	1	0.000559597	0	0	0	0	0	0	74229826	74229966	exon
Flna	chrX	74229913	T	C	-	1392	1	0.000717875	0	0	0	0	0	0	0	0	0	74229826	74229966	exon
Flna	chrX	74229916	T	C	-	1341	2	0.0014892	0	0	0	0	0	0	0	0	0	74229826	74229966	exon
Flna	chrX	74229925	T	C	-	1210	1	0.000825764	0	0	0	0	0	0	0	0	0	74229826	74229966	exon
Flna	chrX	74229947	T	C	-	0	0	0	1443	1	0.000692521	0	0	0	0	0	0	74229826	74229966	exon
Flna	chrX	74229962	T	C	-	854	1	0.00116959	0	0	0	0	0	0	0	0	0	74229826	74229966	exon
Flna	chrX	74230064	T	C	-	0	0	0	1188	2	0.00168067	1033	1	0.000967118	0	0	0	74230056	74230158	exon
Flna	chrX	74230073	T	C	-	0	0	0	0	0	0	0	0	0	1740	1	0.000574383	74230056	74230158	exon
Flna	chrX	74230097	T	C	-	0	0	0	0	0	0	928	1	0.00107643	0	0	0	74230056	74230158	exon
Flna	chrX	74230113	T	C	-	0	0	0	1072	1	0.000931966	0	0	0	0	0	0	74230056	74230158	exon
Flna	chrX	74230116	T	C	-	0	0	0	0	0	0	972	2	0.00205339	0	0	0	74230056	74230158	exon
Flna	chrX	74230153	T	C	-	0	0	0	0	0	0	1004	2	0.00198807	1803	1	0.000554324	74230056	74230158	exon
Flna	chrX	74230308	T	C	-	0	0	0	0	0	0	0	0	0	1829	1	0.000546448	74230301	74230396	exon
Flna	chrX	74230311	T	C	-	0	0	0	0	0	0	1052	1	0.000949668	0	0	0	74230301	74230396	exon
Flna	chrX	74230320	T	C	-	911	1	0.00109649	0	0	0	0	0	0	0	0	0	74230301	74230396	exon
Flna	chrX	74230330	T	C	-	0	0	0	1033	1	0.000967118	0	0	0	0	0	0	74230301	74230396	exon
Flna	chrX	74230361	T	C	-	0	0	0	0	0	0	0	0	0	1589	3	0.00188442	74230301	74230396	exon
Flna	chrX	74230366	T	C	-	869	2	0.00229621	0	0	0	0	0	0	0	0	0	74230301	74230396	exon
Flna	chrX	74230368	T	C	-	0	0	0	1080	1	0.000925069	0	0	0	1643	1	0.000608273	74230301	74230396	exon
Flna	chrX	74230373	T	C	-	973	2	0.00205128	1195	1	0.00083612	0	0	0	1885	1	0.000530223	74230301	74230396	exon
Flna	chrX	74230380	T	C	-	0	0	0	1268	1	0.000788022	0	0	0	2028	1	0.000492854	74230301	74230396	exon
Flna	chrX	74230383	T	C	-	0	0	0	0	0	0	0	0	0	2019	2	0.000989609	74230301	74230396	exon
Flna	chrX	74230508	T	C	-	0	0	0	0	0	0	1177	1	0.000848896	0	0	0	74230506	74230753	exon
Flna	chrX	74230523	T	C	-	0	0	0	1527	1	0.00065445	0	0	0	0	0	0	74230506	74230753	exon
Flna	chrX	74230525	T	C	-	1171	1	0.000853242	0	0	0	0	0	0	0	0	0	74230506	74230753	exon
Flna	chrX	74230564	T	C	-	0	0	0	0	0	0	0	0	0	2763	2	0.000723327	74230506	74230753	exon
Flna	chrX	74230568	T	C	-	0	0	0	0	0	0	1410	1	0.000708717	0	0	0	74230506	74230753	exon
Flna	chrX	74230576	T	C	-	1590	1	0.000628536	0	0	0	0	0	0	0	0	0	74230506	74230753	exon
Flna	chrX	74230584	T	C	-	1432	1	0.000697837	0	0	0	0	0	0	3078	1	0.000324781	74230506	74230753	exon
Flna	chrX	74230588	T	C	-	0	0	0	1905	2	0.00104877	0	0	0	0	0	0	74230506	74230753	exon
Flna	chrX	74230597	T	C	-	0	0	0	1728	1	0.000578369	0	0	0	0	0	0	74230506	74230753	exon
Flna	chrX	74230604	T	C	-	0	0	0	0	0	0	0	0	0	2784	1	0.000359066	74230506	74230753	exon
Flna	chrX	74230609	T	C	-	0	0	0	0	0	0	0	0	0	2779	1	0.000359712	74230506	74230753	exon
Flna	chrX	74230616	T	C	-	0	0	0	1733	1	0.000576701	0	0	0	0	0	0	74230506	74230753	exon
Flna	chrX	74230618	T	C	-	0	0	0	1731	1	0.000577367	1305	1	0.000765697	2809	1	0.000355872	74230506	74230753	exon
Flna	chrX	74230627	T	C	-	0	0	0	1709	1	0.000584795	1358	1	0.000735835	0	0	0	74230506	74230753	exon
Flna	chrX	74230633	T	C	-	0	0	0	0	0	0	0	0	0	2714	2	0.000736377	74230506	74230753	exon
Flna	chrX	74230641	T	C	-	1334	1	0.000749064	1693	1	0.000590319	0	0	0	0	0	0	74230506	74230753	exon
Flna	chrX	74230655	T	C	-	0	0	0	0	0	0	1259	1	0.000793651	2619	2	0.000763068	74230506	74230753	exon
Flna	chrX	74230682	T	C	-	0	0	0	0	0	0	0	0	0	2393	1	0.000417711	74230506	74230753	exon
Flna	chrX	74230689	T	C	-	1303	1	0.000766871	0	0	0	0	0	0	2561	2	0.000780336	74230506	74230753	exon
Flna	chrX	74230693	T	C	-	1293	1	0.000772798	0	0	0	0	0	0	2519	2	0.000793336	74230506	74230753	exon
Flna	chrX	74230709	T	C	-	0	0	0	0	0	0	0	0	0	2912	1	0.000343289	74230506	74230753	exon
Flna	chrX	74230715	T	C	-	0	0	0	0	0	0	0	0	0	2865	1	0.000348918	74230506	74230753	exon
Flna	chrX	74230720	T	C	-	0	0	0	1843	1	0.000542299	0	0	0	0	0	0	74230506	74230753	exon
Flna	chrX	74230729	T	C	-	0	0	0	1739	1	0.000574713	0	0	0	0	0	0	74230506	74230753	exon
Flna	chrX	74231088	T	C	-	0	0	0	0	0	0	0	0	0	83	1	0.0119048	74230753	74232967	intron
Flna	chrX	74231093	T	C	-	0	0	0	0	0	0	0	0	0	82	1	0.0120482	74230753	74232967	intron
Flna	chrX	74231097	T	C	-	0	0	0	0	0	0	0	0	0	77	1	0.0128205	74230753	74232967	intron
Flna	chrX	74231100	T	C	-	0	0	0	0	0	0	0	0	0	77	1	0.0128205	74230753	74232967	intron
Flna	chrX	74231242	T	C	-	0	0	0	0	0	0	0	0	0	88	1	0.011236	74230753	74232967	intron
Flna	chrX	74231362	T	C	-	0	0	0	0	0	0	0	0	0	62	1	0.015873	74230753	74232967	intron
Flna	chrX	74231384	T	C	-	0	0	0	22	1	0.0434783	0	0	0	0	0	0	74230753	74232967	intron
Flna	chrX	74231532	T	C	-	0	0	0	0	0	0	83	1	0.0119048	0	0	0	74230753	74232967	intron
Flna	chrX	74231563	T	C	-	0	0	0	0	0	0	76	1	0.012987	0	0	0	74230753	74232967	intron
Flna	chrX	74231663	T	C	-	0	0	0	44	1	0.0222222	0	0	0	0	0	0	74230753	74232967	intron
Flna	chrX	74231699	T	C	-	61	1	0.016129	0	0	0	0	0	0	0	0	0	74230753	74232967	intron
Flna	chrX	74231733	T	C	-	0	0	0	0	0	0	70	1	0.0140845	0	0	0	74230753	74232967	intron
Flna	chrX	74232139	T	C	-	0	0	0	0	0	0	88	1	0.011236	0	0	0	74230753	74232967	intron
Flna	chrX	74232170	T	C	-	0	0	0	0	0	0	0	0	0	146	1	0.00680272	74230753	74232967	intron
Flna	chrX	74232247	T	C	-	0	46	1	0	32	1	0	73	1	0	82	1	74230753	74232967	intron
Flna	chrX	74232682	T	C	-	0	0	0	0	0	0	0	0	0	53	1	0.0185185	74230753	74232967	intron
Flna	chrX	74232828	T	C	-	0	0	0	0	0	0	0	0	0	71	1	0.0138889	74230753	74232967	intron
Flna	chrX	74232882	T	C	-	0	0	0	24	1	0.04	0	0	0	0	0	0	74230753	74232967	intron
Flna	chrX	74232980	T	C	-	640	1	0.00156006	0	0	0	0	0	0	0	0	0	74232967	74232990	exon
Flna	chrX	74232986	T	C	-	0	0	0	0	0	0	0	0	0	1329	2	0.00150263	74232967	74232990	exon
Flna	chrX	74233024	T	C	-	0	0	0	0	0	0	0	0	0	56	1	0.0175439	74232990	74233149	intron
Flna	chrX	74233156	T	C	-	0	0	0	1606	1	0.000622278	0	0	0	0	0	0	74233149	74233338	exon
Flna	chrX	74233167	T	C	-	0	0	0	1633	2	0.00122324	0	0	0	0	0	0	74233149	74233338	exon
Flna	chrX	74233199	T	C	-	923	1	0.00108225	0	0	0	0	0	0	0	0	0	74233149	74233338	exon
Flna	chrX	74233220	T	C	-	1033	1	0.000967118	0	0	0	0	0	0	0	0	0	74233149	74233338	exon
Flna	chrX	74233233	T	C	-	0	0	0	0	0	0	1102	1	0.000906618	0	0	0	74233149	74233338	exon
Flna	chrX	74233247	T	C	-	0	0	0	0	0	0	1095	1	0.000912409	0	0	0	74233149	74233338	exon
Flna	chrX	74233262	T	C	-	0	0	0	1666	1	0.00059988	0	0	0	2606	1	0.000383583	74233149	74233338	exon
Flna	chrX	74233281	T	C	-	0	0	0	0	0	0	1505	2	0.00132714	0	0	0	74233149	74233338	exon
Flna	chrX	74233285	T	C	-	0	0	0	0	0	0	0	0	0	2846	1	0.000351247	74233149	74233338	exon
Flna	chrX	74233292	T	C	-	1502	1	0.000665336	0	0	0	0	0	0	0	0	0	74233149	74233338	exon
Flna	chrX	74233301	T	C	-	0	0	0	0	0	0	1645	1	0.000607533	0	0	0	74233149	74233338	exon
Flna	chrX	74233304	T	C	-	0	0	0	1855	1	0.000538793	0	0	0	2900	1	0.000344709	74233149	74233338	exon
Flna	chrX	74233312	T	C	-	1621	1	0.000616523	2001	1	0.0004995	1727	1	0.000578704	0	0	0	74233149	74233338	exon
Flna	chrX	74233314	T	C	-	0	0	0	0	0	0	0	0	0	3351	2	0.000596481	74233149	74233338	exon
Flna	chrX	74233317	T	C	-	0	0	0	2195	1	0.000455373	0	0	0	3450	1	0.000289771	74233149	74233338	exon
Flna	chrX	74233319	T	C	-	0	0	0	0	0	0	0	0	0	3534	1	0.000282885	74233149	74233338	exon
Flna	chrX	74233325	T	C	-	0	0	0	0	0	0	0	0	0	3498	1	0.000285796	74233149	74233338	exon
Flna	chrX	74233330	T	C	-	0	0	0	2231	1	0.000448029	0	0	0	0	0	0	74233149	74233338	exon
Flna	chrX	74233331	T	C	-	1747	1	0.000572082	0	0	0	0	0	0	0	0	0	74233149	74233338	exon
Flna	chrX	74233506	T	C	-	0	0	0	0	0	0	16	1	0.0588235	0	0	0	74233338	74233922	intron
Flna	chrX	74233616	T	C	-	0	0	0	0	0	0	0	0	0	16	1	0.0588235	74233338	74233922	intron
Flna	chrX	74233882	T	C	-	0	0	0	0	0	0	0	0	0	21	1	0.0454545	74233338	74233922	intron
Flna	chrX	74233888	T	C	-	0	0	0	0	0	0	22	1	0.0434783	0	0	0	74233338	74233922	intron
Flna	chrX	74233927	T	C	-	0	0	0	2235	1	0.000447227	0	0	0	3509	1	0.0002849	74233922	74234078	exon
Flna	chrX	74233929	T	C	-	0	0	0	2244	1	0.000445434	0	0	0	0	0	0	74233922	74234078	exon
Flna	chrX	74233959	T	C	-	0	0	0	0	0	0	1600	1	0.00062461	2881	1	0.000346981	74233922	74234078	exon
Flna	chrX	74233997	T	C	-	0	0	0	0	0	0	0	0	0	2301	1	0.000434405	74233922	74234078	exon
Flna	chrX	74234010	T	C	-	0	0	0	0	0	0	0	0	0	2089	1	0.000478469	74233922	74234078	exon
Flna	chrX	74234021	T	C	-	0	0	0	1242	1	0.000804505	1140	1	0.000876424	1946	1	0.000513611	74233922	74234078	exon
Flna	chrX	74234032	T	C	-	0	0	0	0	0	0	1203	1	0.000830565	2014	1	0.000496278	74233922	74234078	exon
Flna	chrX	74234038	T	C	-	955	1	0.00104603	0	0	0	0	0	0	0	0	0	74233922	74234078	exon
Flna	chrX	74234064	T	C	-	0	0	0	0	0	0	1136	1	0.000879507	0	0	0	74233922	74234078	exon
Flna	chrX	74234129	T	C	-	0	0	0	29	1	0.0333333	0	0	0	50	1	0.0196078	74234078	74234163	intron
Flna	chrX	74234164	T	C	-	0	0	0	0	0	0	1163	1	0.000859107	0	0	0	74234163	74234286	exon
Flna	chrX	74234168	T	C	-	0	0	0	0	0	0	1114	1	0.000896861	0	0	0	74234163	74234286	exon
Flna	chrX	74234174	T	C	-	918	1	0.00108814	0	0	0	0	0	0	1826	1	0.000547345	74234163	74234286	exon
Flna	chrX	74234216	T	C	-	0	0	0	1050	1	0.000951475	0	0	0	0	0	0	74234163	74234286	exon
Flna	chrX	74234221	T	C	-	0	0	0	0	0	0	1030	1	0.000969932	0	0	0	74234163	74234286	exon
Flna	chrX	74234256	T	C	-	0	0	0	0	0	0	0	0	0	1527	1	0.00065445	74234163	74234286	exon
Flna	chrX	74234259	T	C	-	0	0	0	970	1	0.00102987	0	0	0	0	0	0	74234163	74234286	exon
Flna	chrX	74234264	T	C	-	0	0	0	925	1	0.00107991	0	0	0	0	0	0	74234163	74234286	exon
Flna	chrX	74234268	T	C	-	0	0	0	0	0	0	976	1	0.00102354	0	0	0	74234163	74234286	exon
Flna	chrX	74234273	T	C	-	0	0	0	0	0	0	966	1	0.00103413	1492	1	0.000669792	74234163	74234286	exon
Flna	chrX	74234576	T	C	-	0	0	0	0	0	0	0	0	0	57	1	0.0172414	74234286	74234604	intron
Flna	chrX	74234615	T	C	-	0	0	0	983	1	0.00101626	0	0	0	0	0	0	74234604	74234774	exon
Flna	chrX	74234622	T	C	-	0	0	0	0	0	0	0	0	0	1600	1	0.00062461	74234604	74234774	exon
Flna	chrX	74234647	T	C	-	961	2	0.00207684	0	0	0	0	0	0	0	0	0	74234604	74234774	exon
Flna	chrX	74234655	T	C	-	1029	2	0.00193986	0	0	0	1178	1	0.000848176	0	0	0	74234604	74234774	exon
Flna	chrX	74234698	T	C	-	0	0	0	0	0	0	0	0	0	1999	1	0.0005	74234604	74234774	exon
Flna	chrX	74234704	T	C	-	0	0	0	1298	1	0.000769823	0	0	0	0	0	0	74234604	74234774	exon
Flna	chrX	74234713	T	C	-	0	0	0	0	0	0	0	0	0	2091	2	0.000955566	74234604	74234774	exon
Flna	chrX	74234723	T	C	-	1223	1	0.000816993	0	0	0	0	0	0	0	0	0	74234604	74234774	exon
Flna	chrX	74234724	T	C	-	0	0	0	0	0	0	1334	1	0.000749064	0	0	0	74234604	74234774	exon
Flna	chrX	74234729	T	C	-	1228	1	0.00081367	0	0	0	0	0	0	0	0	0	74234604	74234774	exon
Flna	chrX	74234747	T	C	-	0	0	0	1323	1	0.000755287	0	0	0	0	0	0	74234604	74234774	exon
Flna	chrX	74234752	T	C	-	0	0	0	0	0	0	0	0	0	2047	1	0.000488281	74234604	74234774	exon
Flna	chrX	74234908	T	C	-	834	2	0.00239234	0	0	0	0	0	0	0	0	0	74234865	74235025	exon
Flna	chrX	74234914	T	C	-	0	0	0	0	0	0	0	0	0	1462	1	0.000683527	74234865	74235025	exon
Flna	chrX	74234927	T	C	-	813	1	0.0012285	0	0	0	0	0	0	0	0	0	74234865	74235025	exon
Flna	chrX	74234930	T	C	-	0	0	0	0	0	0	0	0	0	1545	2	0.00129282	74234865	74235025	exon
Flna	chrX	74234943	T	C	-	0	0	0	0	0	0	1066	1	0.000937207	0	0	0	74234865	74235025	exon
Flna	chrX	74234978	T	C	-	0	0	0	1219	1	0.000819672	1105	2	0.00180668	0	0	0	74234865	74235025	exon
Flna	chrX	74235013	T	C	-	0	0	0	0	0	0	1043	2	0.00191388	1700	1	0.000587889	74234865	74235025	exon
Flna	chrX	74235015	T	C	-	0	0	0	0	0	0	0	0	0	1690	1	0.000591366	74234865	74235025	exon
Flna	chrX	74235111	T	C	-	1042	2	0.00191571	1241	2	0.00160901	0	0	0	0	0	0	74235110	74235272	exon
Flna	chrX	74235116	T	C	-	0	0	0	1289	1	0.000775194	1207	1	0.000827815	0	0	0	74235110	74235272	exon
Flna	chrX	74235144	T	C	-	0	0	0	0	0	0	0	0	0	2529	1	0.000395257	74235110	74235272	exon
Flna	chrX	74235147	T	C	-	1359	1	0.000735294	0	0	0	0	0	0	0	0	0	74235110	74235272	exon
Flna	chrX	74235163	T	C	-	0	0	0	1742	1	0.000573723	0	0	0	0	0	0	74235110	74235272	exon
Flna	chrX	74235191	T	C	-	0	0	0	0	0	0	1543	1	0.000647668	0	0	0	74235110	74235272	exon
Flna	chrX	74235200	T	C	-	0	0	0	0	0	0	0	0	0	2558	1	0.000390778	74235110	74235272	exon
Flna	chrX	74235205	T	C	-	1330	1	0.000751315	0	0	0	0	0	0	0	0	0	74235110	74235272	exon
Flna	chrX	74235215	T	C	-	1297	1	0.000770416	0	0	0	1429	2	0.00139762	0	0	0	74235110	74235272	exon
Flna	chrX	74235225	T	C	-	0	0	0	0	0	0	1457	2	0.0013708	2440	1	0.000409668	74235110	74235272	exon
Flna	chrX	74235228	T	C	-	0	0	0	1654	1	0.00060423	0	0	0	0	0	0	74235110	74235272	exon
Flna	chrX	74235257	T	C	-	0	0	0	0	0	0	1163	1	0.000859107	0	0	0	74235110	74235272	exon
Flna	chrX	74235366	T	C	-	0	0	0	0	0	0	0	0	0	1762	2	0.00113379	74235356	74235529	exon
Flna	chrX	74235387	T	C	-	0	0	0	0	0	0	0	0	0	1902	1	0.000525486	74235356	74235529	exon
Flna	chrX	74235389	T	C	-	0	0	0	0	0	0	0	0	0	1971	1	0.000507099	74235356	74235529	exon
Flna	chrX	74235406	T	C	-	1007	1	0.000992063	0	0	0	0	0	0	0	0	0	74235356	74235529	exon
Flna	chrX	74235420	T	C	-	0	0	0	0	0	0	0	0	0	1944	1	0.000514139	74235356	74235529	exon
Flna	chrX	74235427	T	C	-	991	1	0.00100806	0	0	0	0	0	0	0	0	0	74235356	74235529	exon
Flna	chrX	74235428	T	C	-	0	0	0	0	0	0	0	0	0	1869	1	0.000534759	74235356	74235529	exon
Flna	chrX	74235454	T	C	-	1152	1	0.000867303	0	0	0	1225	1	0.000815661	2116	2	0.000944287	74235356	74235529	exon
Flna	chrX	74235455	T	C	-	0	0	0	0	0	0	0	0	0	2119	2	0.000942951	74235356	74235529	exon
Flna	chrX	74235460	T	C	-	0	0	0	0	0	0	0	0	0	2063	1	0.000484496	74235356	74235529	exon
Flna	chrX	74235468	T	C	-	1152	2	0.0017331	0	0	0	0	0	0	2130	1	0.000469263	74235356	74235529	exon
Flna	chrX	74235509	T	C	-	0	0	0	1270	1	0.000786782	0	0	0	0	0	0	74235356	74235529	exon
Flna	chrX	74235519	T	C	-	0	0	0	1297	1	0.000770416	0	0	0	0	0	0	74235356	74235529	exon
Flna	chrX	74235627	T	C	-	927	1	0.00107759	0	0	0	0	0	0	0	0	0	74235620	74236217	exon
Flna	chrX	74235649	T	C	-	0	0	0	0	0	0	982	2	0.00203252	1569	1	0.000636943	74235620	74236217	exon
Flna	chrX	74235657	T	C	-	0	0	0	0	0	0	938	1	0.00106496	1495	1	0.000668449	74235620	74236217	exon
Flna	chrX	74235662	T	C	-	0	0	0	1084	1	0.000921659	0	0	0	0	0	0	74235620	74236217	exon
Flna	chrX	74235682	T	C	-	0	0	0	1071	1	0.000932836	0	0	0	1579	2	0.00126502	74235620	74236217	exon
Flna	chrX	74235688	T	C	-	896	1	0.00111483	0	0	0	0	0	0	0	0	0	74235620	74236217	exon
Flna	chrX	74235692	T	C	-	0	0	0	1158	1	0.000862813	0	0	0	0	0	0	74235620	74236217	exon
Flna	chrX	74235700	T	C	-	0	0	0	0	0	0	0	0	0	2026	1	0.00049334	74235620	74236217	exon
Flna	chrX	74235701	T	C	-	0	0	0	0	0	0	0	0	0	2034	1	0.0004914	74235620	74236217	exon
Flna	chrX	74235712	T	C	-	1012	1	0.000987167	0	0	0	0	0	0	0	0	0	74235620	74236217	exon
Flna	chrX	74235739	T	C	-	999	2	0.001998	0	0	0	0	0	0	1936	1	0.000516262	74235620	74236217	exon
Flna	chrX	74235802	T	C	-	1007	1	0.000992063	0	0	0	0	0	0	0	0	0	74235620	74236217	exon
Flna	chrX	74235804	T	C	-	0	0	0	1313	1	0.000761035	1165	1	0.000857633	0	0	0	74235620	74236217	exon
Flna	chrX	74235807	T	C	-	0	0	0	0	0	0	1117	1	0.000894454	0	0	0	74235620	74236217	exon
Flna	chrX	74235808	T	C	-	0	0	0	0	0	0	0	0	0	2041	1	0.000489716	74235620	74236217	exon
Flna	chrX	74235813	T	C	-	0	0	0	0	0	0	0	0	0	2155	1	0.000463822	74235620	74236217	exon
Flna	chrX	74235819	T	C	-	0	0	0	1350	1	0.000740192	0	0	0	0	0	0	74235620	74236217	exon
Flna	chrX	74235822	T	C	-	0	0	0	1351	1	0.000739645	0	0	0	2113	1	0.000473037	74235620	74236217	exon
Flna	chrX	74235826	T	C	-	0	0	0	0	0	0	0	0	0	2191	1	0.000456204	74235620	74236217	exon
Flna	chrX	74235836	T	C	-	0	0	0	0	0	0	1152	1	0.000867303	0	0	0	74235620	74236217	exon
Flna	chrX	74235838	T	C	-	1079	1	0.000925926	0	0	0	0	0	0	2188	1	0.00045683	74235620	74236217	exon
Flna	chrX	74235867	T	C	-	0	0	0	0	0	0	0	0	0	1715	1	0.000582751	74235620	74236217	exon
Flna	chrX	74235874	T	C	-	0	0	0	1049	1	0.000952381	0	0	0	0	0	0	74235620	74236217	exon
Flna	chrX	74235891	T	C	-	724	1	0.00137931	954	1	0.00104712	0	0	0	0	0	0	74235620	74236217	exon
Flna	chrX	74235913	T	C	-	0	0	0	0	0	0	0	0	0	1549	1	0.000645161	74235620	74236217	exon
Flna	chrX	74235927	T	C	-	717	1	0.00139276	0	0	0	0	0	0	1385	1	0.000721501	74235620	74236217	exon
Flna	chrX	74235941	T	C	-	0	0	0	0	0	0	0	0	0	1433	1	0.00069735	74235620	74236217	exon
Flna	chrX	74235973	T	C	-	0	0	0	945	1	0.00105708	0	0	0	1401	1	0.000713267	74235620	74236217	exon
Flna	chrX	74235998	T	C	-	0	0	0	0	0	0	1110	1	0.00090009	2014	3	0.00148736	74235620	74236217	exon
Flna	chrX	74236000	T	C	-	0	0	0	0	0	0	0	0	0	2142	1	0.000466636	74235620	74236217	exon
Flna	chrX	74236069	T	C	-	0	0	0	0	0	0	0	0	0	2380	1	0.000419992	74235620	74236217	exon
Flna	chrX	74236075	T	C	-	1332	1	0.000750188	0	0	0	0	0	0	0	0	0	74235620	74236217	exon
Flna	chrX	74236095	T	C	-	0	0	0	1499	1	0.000666667	0	0	0	0	0	0	74235620	74236217	exon
Flna	chrX	74236098	T	C	-	0	0	0	0	0	0	0	0	0	2194	1	0.000455581	74235620	74236217	exon
Flna	chrX	74236111	T	C	-	0	0	0	1252	1	0.000798085	0	0	0	0	0	0	74235620	74236217	exon
Flna	chrX	74236136	T	C	-	960	3	0.00311526	0	0	0	0	0	0	0	0	0	74235620	74236217	exon
Flna	chrX	74236147	T	C	-	1129	1	0.000884956	0	0	0	0	0	0	0	0	0	74235620	74236217	exon
Flna	chrX	74236148	T	C	-	0	0	0	0	0	0	1206	1	0.0008285	0	0	0	74235620	74236217	exon
Flna	chrX	74236149	T	C	-	1176	1	0.000849618	0	0	0	0	0	0	0	0	0	74235620	74236217	exon
Flna	chrX	74236179	T	C	-	1090	1	0.00091659	0	0	0	0	0	0	0	0	0	74235620	74236217	exon
Flna	chrX	74236184	T	C	-	0	0	0	0	0	0	1069	1	0.000934579	0	0	0	74235620	74236217	exon
Flna	chrX	74236203	T	C	-	0	0	0	1532	1	0.000652316	0	0	0	2519	1	0.000396825	74235620	74236217	exon
Flna	chrX	74236214	T	C	-	0	0	0	0	0	0	1200	1	0.000832639	2584	1	0.000386847	74235620	74236217	exon
Flna	chrX	74236290	T	C	-	0	0	0	0	0	0	38	1	0.025641	0	0	0	74236217	74236743	intron
Flna	chrX	74236366	T	C	-	24	1	0.04	0	0	0	0	0	0	0	0	0	74236217	74236743	intron
Flna	chrX	74236736	T	C	-	14	3	0.176471	20	1	0.047619	34	3	0.0810811	40	1	0.0243902	74236217	74236743	intron
Flna	chrX	74236740	T	C	-	11	3	0.214286	21	1	0.0454545	34	3	0.0810811	38	1	0.025641	74236217	74236743	intron
Flna	chrX	74236794	T	C	-	0	0	0	1233	1	0.000810373	0	0	0	0	0	0	74236743	74237005	exon
Flna	chrX	74236807	T	C	-	0	0	0	0	0	0	0	0	0	2002	1	0.000499251	74236743	74237005	exon
Flna	chrX	74236828	T	C	-	0	0	0	0	0	0	1027	1	0.000972763	0	0	0	74236743	74237005	exon
Flna	chrX	74236837	T	C	-	864	2	0.00230947	0	0	0	978	1	0.00102145	0	0	0	74236743	74237005	exon
Flna	chrX	74236857	T	C	-	0	0	0	1079	1	0.000925926	0	0	0	0	0	0	74236743	74237005	exon
Flna	chrX	74236865	T	C	-	0	0	0	0	0	0	1005	1	0.000994036	0	0	0	74236743	74237005	exon
Flna	chrX	74236870	T	C	-	0	0	0	0	0	0	0	0	0	1821	1	0.000548847	74236743	74237005	exon
Flna	chrX	74236875	T	C	-	0	0	0	0	0	0	1011	1	0.000988142	0	0	0	74236743	74237005	exon
Flna	chrX	74236894	T	C	-	0	0	0	0	0	0	995	1	0.00100402	0	0	0	74236743	74237005	exon
Flna	chrX	74236902	T	C	-	0	0	0	1170	1	0.000853971	0	0	0	0	0	0	74236743	74237005	exon
Flna	chrX	74236908	T	C	-	0	0	0	0	0	0	906	2	0.00220264	0	0	0	74236743	74237005	exon
Flna	chrX	74236922	T	C	-	891	1	0.00112108	0	0	0	0	0	0	0	0	0	74236743	74237005	exon
Flna	chrX	74236941	T	C	-	943	1	0.00105932	0	0	0	0	0	0	0	0	0	74236743	74237005	exon
Flna	chrX	74236942	T	C	-	0	0	0	0	0	0	1048	1	0.000953289	0	0	0	74236743	74237005	exon
Flna	chrX	74236947	T	C	-	1029	2	0.00193986	1341	1	0.000745156	0	0	0	2091	1	0.000478011	74236743	74237005	exon
Flna	chrX	74236948	T	C	-	1023	1	0.000976562	1351	1	0.000739645	0	0	0	2108	1	0.000474158	74236743	74237005	exon
Flna	chrX	74236956	T	C	-	0	0	0	1341	1	0.000745156	0	0	0	0	0	0	74236743	74237005	exon
Flna	chrX	74236963	T	C	-	1005	1	0.000994036	0	0	0	0	0	0	2045	1	0.000488759	74236743	74237005	exon
Flna	chrX	74236964	T	C	-	0	0	0	1357	2	0.00147167	0	0	0	0	0	0	74236743	74237005	exon
Flna	chrX	74236971	T	C	-	0	0	0	0	0	0	1124	2	0.0017762	0	0	0	74236743	74237005	exon
Flna	chrX	74236981	T	C	-	0	0	0	0	0	0	0	0	0	2159	2	0.000925497	74236743	74237005	exon
Flna	chrX	74236984	T	C	-	0	0	0	1390	1	0.000718907	0	0	0	0	0	0	74236743	74237005	exon
Flna	chrX	74236989	T	C	-	0	0	0	0	0	0	1095	1	0.000912409	0	0	0	74236743	74237005	exon
Flna	chrX	74237119	T	C	-	0	0	0	0	0	0	0	0	0	38	1	0.025641	74237005	74237122	intron
Flna	chrX	74237124	T	C	-	0	0	0	1521	1	0.00065703	0	0	0	0	0	0	74237122	74237239	exon
Flna	chrX	74237149	T	C	-	0	0	0	0	0	0	1200	1	0.000832639	0	0	0	74237122	74237239	exon
Flna	chrX	74237171	T	C	-	965	2	0.00206825	0	0	0	0	0	0	0	0	0	74237122	74237239	exon
Flna	chrX	74237186	T	C	-	0	0	0	0	0	0	0	0	0	1709	1	0.000584795	74237122	74237239	exon
Flna	chrX	74237191	T	C	-	0	0	0	0	0	0	0	0	0	1673	2	0.00119403	74237122	74237239	exon
Flna	chrX	74237194	T	C	-	0	0	0	1174	1	0.000851064	972	1	0.00102775	0	0	0	74237122	74237239	exon
Flna	chrX	74237224	T	C	-	0	0	0	0	0	0	0	0	0	1650	1	0.000605694	74237122	74237239	exon
Flna	chrX	74237231	T	C	-	0	0	0	0	0	0	1053	1	0.000948767	0	0	0	74237122	74237239	exon
Flna	chrX	74237266	T	C	-	0	0	0	0	0	0	21	1	0.0454545	0	0	0	74237239	74237421	intron
Flna	chrX	74237445	T	C	-	0	0	0	0	0	0	0	0	0	1670	1	0.000598444	74237421	74237590	exon
Flna	chrX	74237456	T	C	-	0	0	0	0	0	0	0	0	0	2073	1	0.00048216	74237421	74237590	exon
Flna	chrX	74237458	T	C	-	0	0	0	0	0	0	1209	1	0.000826446	0	0	0	74237421	74237590	exon
Flna	chrX	74237476	T	C	-	1216	1	0.000821693	0	0	0	0	0	0	2419	1	0.000413223	74237421	74237590	exon
Flna	chrX	74237494	T	C	-	0	0	0	0	0	0	0	0	0	2542	3	0.00117878	74237421	74237590	exon
Flna	chrX	74237496	T	C	-	0	0	0	0	0	0	1489	1	0.000671141	0	0	0	74237421	74237590	exon
Flna	chrX	74237500	T	C	-	1328	2	0.00150376	0	0	0	0	0	0	0	0	0	74237421	74237590	exon
Flna	chrX	74237511	T	C	-	0	0	0	0	0	0	1503	2	0.0013289	0	0	0	74237421	74237590	exon
Flna	chrX	74237535	T	C	-	0	0	0	1602	1	0.00062383	0	0	0	0	0	0	74237421	74237590	exon
Flna	chrX	74237536	T	C	-	0	0	0	0	0	0	1458	1	0.000685401	0	0	0	74237421	74237590	exon
Flna	chrX	74237559	T	C	-	1231	1	0.000811688	0	0	0	0	0	0	0	0	0	74237421	74237590	exon
Flna	chrX	74237570	T	C	-	0	0	0	0	0	0	1606	1	0.000622278	0	0	0	74237421	74237590	exon
Flna	chrX	74237685	T	C	-	0	0	0	1730	2	0.00115473	0	0	0	0	0	0	74237682	74237772	exon
Flna	chrX	74237691	T	C	-	1158	1	0.000862813	0	0	0	0	0	0	0	0	0	74237682	74237772	exon
Flna	chrX	74237692	T	C	-	0	0	0	0	0	0	1431	2	0.00139567	0	0	0	74237682	74237772	exon
Flna	chrX	74237705	T	C	-	0	0	0	1590	1	0.000628536	0	0	0	0	0	0	74237682	74237772	exon
Flna	chrX	74237711	T	C	-	0	0	0	1569	1	0.000636943	0	0	0	2363	1	0.000423012	74237682	74237772	exon
Flna	chrX	74237726	T	C	-	0	0	0	0	0	0	0	0	0	2458	1	0.000406669	74237682	74237772	exon
Flna	chrX	74237729	T	C	-	0	0	0	0	0	0	0	0	0	2483	2	0.000804829	74237682	74237772	exon
Flna	chrX	74237745	T	C	-	1220	1	0.000819001	1641	1	0.000609013	0	0	0	0	0	0	74237682	74237772	exon
Flna	chrX	74237751	T	C	-	0	0	0	0	0	0	0	0	0	2475	1	0.000403877	74237682	74237772	exon
Flna	chrX	74237760	T	C	-	0	0	0	0	0	0	1270	2	0.00157233	0	0	0	74237682	74237772	exon
Flna	chrX	74237767	T	C	-	0	0	0	1471	1	0.000679348	0	0	0	2172	1	0.000460193	74237682	74237772	exon
Flna	chrX	74237769	T	C	-	1100	1	0.000908265	0	0	0	0	0	0	0	0	0	74237682	74237772	exon
Flna	chrX	74237857	T	C	-	1139	1	0.000877193	0	0	0	1214	1	0.000823045	0	0	0	74237856	74238016	exon
Flna	chrX	74237876	T	C	-	0	0	0	0	0	0	1195	1	0.00083612	0	0	0	74237856	74238016	exon
Flna	chrX	74237888	T	C	-	0	0	0	0	0	0	1280	1	0.00078064	0	0	0	74237856	74238016	exon
Flna	chrX	74237926	T	C	-	1364	1	0.000732601	0	0	0	0	0	0	2794	1	0.000357782	74237856	74238016	exon
Flna	chrX	74237930	T	C	-	0	0	0	0	0	0	0	0	0	2805	3	0.00106838	74237856	74238016	exon
Flna	chrX	74237945	T	C	-	1380	1	0.000724113	0	0	0	1414	2	0.00141243	0	0	0	74237856	74238016	exon
Flna	chrX	74237959	T	C	-	1248	1	0.000800641	0	0	0	0	0	0	2321	1	0.000430663	74237856	74238016	exon
Flna	chrX	74237965	T	C	-	0	0	0	1599	1	0.000625	0	0	0	0	0	0	74237856	74238016	exon
Flna	chrX	74237979	T	C	-	0	0	0	1520	2	0.00131406	0	0	0	2295	1	0.00043554	74237856	74238016	exon
Flna	chrX	74238008	T	C	-	0	0	0	1452	1	0.000688231	1247	1	0.000801282	0	0	0	74237856	74238016	exon
Flna	chrX	74238114	T	C	-	0	0	0	1166	1	0.000856898	0	0	0	0	0	0	74238104	74238227	exon
Flna	chrX	74238148	T	C	-	0	0	0	1166	1	0.000856898	0	0	0	0	0	0	74238104	74238227	exon
Flna	chrX	74238155	T	C	-	898	1	0.00111235	0	0	0	0	0	0	0	0	0	74238104	74238227	exon
Flna	chrX	74238190	T	C	-	0	0	0	1117	1	0.000894454	0	0	0	0	0	0	74238104	74238227	exon
Flna	chrX	74238201	T	C	-	0	0	0	1175	1	0.00085034	0	0	0	0	0	0	74238104	74238227	exon
Flna	chrX	74238209	T	C	-	0	0	0	0	0	0	0	0	0	1873	1	0.000533618	74238104	74238227	exon
Flna	chrX	74238332	T	C	-	0	0	0	0	0	0	21	1	0.0454545	0	0	0	74238227	74239099	intron
Flna	chrX	74239041	T	C	-	0	0	0	0	0	0	0	0	0	41	1	0.0238095	74238227	74239099	intron
Flna	chrX	74239096	T	C	-	0	0	0	0	0	0	0	0	0	35	1	0.0277778	74238227	74239099	intron
Flna	chrX	74239122	T	C	-	854	1	0.00116959	1054	1	0.000947867	1042	2	0.00191571	1685	1	0.00059312	74239099	74239242	exon
Flna	chrX	74239143	T	C	-	0	0	0	0	0	0	1040	1	0.000960615	0	0	0	74239099	74239242	exon
Flna	chrX	74239147	T	C	-	0	0	0	1177	1	0.000848896	0	0	0	0	0	0	74239099	74239242	exon
Flna	chrX	74239154	T	C	-	0	0	0	1239	1	0.000806452	0	0	0	0	0	0	74239099	74239242	exon
Flna	chrX	74239159	T	C	-	1015	1	0.000984252	0	0	0	0	0	0	0	0	0	74239099	74239242	exon
Flna	chrX	74239167	T	C	-	996	1	0.00100301	0	0	0	1105	1	0.000904159	0	0	0	74239099	74239242	exon
Flna	chrX	74239175	T	C	-	1072	1	0.000931966	1277	1	0.000782473	0	0	0	0	0	0	74239099	74239242	exon
Flna	chrX	74239202	T	C	-	1297	2	0.00153965	1576	2	0.00126743	1325	1	0.000754148	2380	2	0.000839631	74239099	74239242	exon
Flna	chrX	74239203	T	C	-	1301	1	0.000768049	1589	2	0.00125707	0	0	0	0	0	0	74239099	74239242	exon
Flna	chrX	74239208	T	C	-	0	0	0	0	0	0	0	0	0	2436	1	0.000410341	74239099	74239242	exon
Flna	chrX	74239219	T	C	-	1297	1	0.000770416	0	0	0	0	0	0	0	0	0	74239099	74239242	exon
Flna	chrX	74239235	T	C	-	1379	1	0.000724638	0	0	0	0	0	0	2483	1	0.000402576	74239099	74239242	exon
Flna	chrX	74239241	T	C	-	0	0	0	0	0	0	1417	2	0.00140944	0	0	0	74239099	74239242	exon
Flna	chrX	74239335	T	C	-	0	0	0	1607	1	0.000621891	0	0	0	2446	1	0.000408664	74239334	74239447	exon
Flna	chrX	74239340	T	C	-	1234	1	0.000809717	0	0	0	0	0	0	0	0	0	74239334	74239447	exon
Flna	chrX	74239346	T	C	-	0	0	0	0	0	0	0	0	0	2281	1	0.000438212	74239334	74239447	exon
Flna	chrX	74239377	T	C	-	1173	2	0.00170213	0	0	0	0	0	0	0	0	0	74239334	74239447	exon
Flna	chrX	74239382	T	C	-	0	0	0	0	0	0	1118	1	0.000893655	0	0	0	74239334	74239447	exon
Flna	chrX	74239402	T	C	-	907	1	0.00110132	0	0	0	0	0	0	0	0	0	74239334	74239447	exon
Flna	chrX	74239422	T	C	-	0	0	0	0	0	0	1063	1	0.00093985	0	0	0	74239334	74239447	exon
Flna	chrX	74239427	T	C	-	0	0	0	0	0	0	0	0	0	1757	1	0.000568828	74239334	74239447	exon
Flna	chrX	74239443	T	C	-	970	1	0.00102987	0	0	0	0	0	0	0	0	0	74239334	74239447	exon
Flna	chrX	74239649	T	C	-	42	6	0.125	32	4	0.111111	47	12	0.20339	0	0	0	74239447	74239652	intron
Flna	chrX	74239676	T	C	-	0	0	0	1306	1	0.000765111	0	0	0	1961	1	0.000509684	74239652	74239696	exon
Flna	chrX	74239680	T	C	-	0	0	0	1361	1	0.000734214	1172	3	0.00255319	0	0	0	74239652	74239696	exon
Flna	chrX	74239696	T	C	-	0	0	0	0	0	0	1095	1	0.000912409	0	0	0	74239652	74239845	exon
Flna	chrX	74239705	T	C	-	1030	4	0.00386847	0	0	0	0	0	0	0	0	0	74239652	74239845	exon
Flna	chrX	74239716	T	C	-	1003	1	0.000996016	1350	1	0.000740192	0	0	0	0	0	0	74239652	74239845	exon
Flna	chrX	74239725	T	C	-	0	0	0	0	0	0	1007	1	0.000992063	0	0	0	74239652	74239845	exon
Flna	chrX	74239758	T	C	-	0	0	0	1401	1	0.000713267	0	0	0	0	0	0	74239652	74239845	exon
Flna	chrX	74239761	T	C	-	0	0	0	0	0	0	0	0	0	2036	2	0.000981354	74239652	74239845	exon
Flna	chrX	74239797	T	C	-	0	0	0	0	0	0	1397	2	0.00142959	0	0	0	74239652	74239845	exon
Flna	chrX	74239803	T	C	-	0	0	0	2176	2	0.000918274	1682	1	0.000594177	0	0	0	74239652	74239845	exon
Flna	chrX	74239821	T	C	-	1815	1	0.000550661	0	0	0	0	0	0	3592	3	0.000834492	74239652	74239845	exon
Flna	chrX	74239823	T	C	-	1844	1	0.000542005	0	0	0	0	0	0	0	0	0	74239652	74239845	exon
Flna	chrX	74239826	T	C	-	0	0	0	0	0	0	0	0	0	3661	1	0.000273075	74239652	74239845	exon
Flna	chrX	74239909	T	C	-	112	1	0.00884956	0	0	0	0	0	0	0	0	0	74239845	74239946	intron
Flna	chrX	74239952	T	C	-	0	0	0	0	0	0	1691	1	0.000591017	0	0	0	74239946	74240082	exon
Flna	chrX	74239960	T	C	-	0	0	0	2406	1	0.000415455	0	0	0	0	0	0	74239946	74240082	exon
Flna	chrX	74239975	T	C	-	0	0	0	0	0	0	1826	1	0.000547345	0	0	0	74239946	74240082	exon
Flna	chrX	74239977	T	C	-	1845	1	0.000541712	0	0	0	1810	1	0.000552181	0	0	0	74239946	74240082	exon
Flna	chrX	74239980	T	C	-	1844	1	0.000542005	0	0	0	0	0	0	0	0	0	74239946	74240082	exon
Flna	chrX	74239987	T	C	-	1849	1	0.000540541	0	0	0	0	0	0	3536	1	0.000282725	74239946	74240082	exon
Flna	chrX	74239992	T	C	-	0	0	0	0	0	0	1777	1	0.00056243	0	0	0	74239946	74240082	exon
Flna	chrX	74240006	T	C	-	0	0	0	0	0	0	1453	1	0.000687758	0	0	0	74239946	74240082	exon
Flna	chrX	74240010	T	C	-	0	0	0	0	0	0	1618	1	0.000617665	0	0	0	74239946	74240082	exon
Flna	chrX	74240041	T	C	-	1897	2	0.00105319	0	0	0	0	0	0	0	0	0	74239946	74240082	exon
Flna	chrX	74240044	T	C	-	0	0	0	0	0	0	0	0	0	3650	1	0.000273898	74239946	74240082	exon
Flna	chrX	74240047	T	C	-	0	0	0	0	0	0	0	0	0	3505	1	0.000285225	74239946	74240082	exon
Flna	chrX	74240048	T	C	-	0	0	0	0	0	0	0	0	0	3596	1	0.000278009	74239946	74240082	exon
Flna	chrX	74240064	T	C	-	1906	1	0.000524384	2421	1	0.000412882	0	0	0	3587	1	0.000278707	74239946	74240082	exon
Flna	chrX	74240068	T	C	-	1901	2	0.00105097	2440	1	0.000409668	0	0	0	0	0	0	74239946	74240082	exon
Flna	chrX	74240069	T	C	-	0	0	0	0	0	0	1972	1	0.000506842	0	0	0	74239946	74240082	exon
Flna	chrX	74240220	T	C	-	0	0	0	0	0	0	0	0	0	3415	1	0.00029274	74240205	74240328	exon
Flna	chrX	74240231	T	C	-	0	0	0	0	0	0	0	0	0	3299	1	0.00030303	74240205	74240328	exon
Flna	chrX	74240236	T	C	-	0	0	0	2299	1	0.000434783	0	0	0	0	0	0	74240205	74240328	exon
Flna	chrX	74240245	T	C	-	0	0	0	0	0	0	0	0	0	3280	1	0.000304785	74240205	74240328	exon
Flna	chrX	74240261	T	C	-	0	0	0	0	0	0	0	0	0	2711	1	0.000368732	74240205	74240328	exon
Flna	chrX	74240268	T	C	-	0	0	0	0	0	0	1529	1	0.000653595	0	0	0	74240205	74240328	exon
Flna	chrX	74240292	T	C	-	1323	2	0.00150943	1678	4	0.00237812	0	0	0	0	0	0	74240205	74240328	exon
Flna	chrX	74240304	T	C	-	1500	1	0.000666223	1877	1	0.000532481	0	0	0	0	0	0	74240205	74240328	exon
Flna	chrX	74240307	T	C	-	1524	2	0.00131062	0	0	0	0	0	0	0	0	0	74240205	74240328	exon
Flna	chrX	74240311	T	C	-	0	0	0	0	0	0	0	0	0	2858	1	0.000349773	74240205	74240328	exon
Flna	chrX	74240319	T	C	-	0	0	0	0	0	0	0	0	0	3029	3	0.000989446	74240205	74240328	exon
Flna	chrX	74240370	T	C	-	43	1	0.0227273	0	0	0	0	0	0	0	0	0	74240328	74240413	intron
Flna	chrX	74240423	T	C	-	0	0	0	0	0	0	0	0	0	2709	1	0.000369004	74240413	74240550	exon
Flna	chrX	74240433	T	C	-	0	0	0	1777	1	0.00056243	0	0	0	0	0	0	74240413	74240550	exon
Flna	chrX	74240435	T	C	-	0	0	0	0	0	0	0	0	0	2620	1	0.000381534	74240413	74240550	exon
Flna	chrX	74240439	T	C	-	0	0	0	1695	1	0.000589623	1518	2	0.00131579	0	0	0	74240413	74240550	exon
Flna	chrX	74240446	T	C	-	0	0	0	0	0	0	0	0	0	2531	1	0.000394945	74240413	74240550	exon
Flna	chrX	74240457	T	C	-	0	0	0	0	0	0	1556	2	0.0012837	0	0	0	74240413	74240550	exon
Flna	chrX	74240463	T	C	-	0	0	0	0	0	0	1664	1	0.000600601	0	0	0	74240413	74240550	exon
Flna	chrX	74240475	T	C	-	1460	1	0.000684463	0	0	0	0	0	0	0	0	0	74240413	74240550	exon
Flna	chrX	74240480	T	C	-	1478	1	0.000676133	0	0	0	0	0	0	0	0	0	74240413	74240550	exon
Flna	chrX	74240484	T	C	-	0	0	0	1856	1	0.000538503	0	0	0	0	0	0	74240413	74240550	exon
Flna	chrX	74240487	T	C	-	0	0	0	1804	1	0.000554017	0	0	0	0	0	0	74240413	74240550	exon
Flna	chrX	74240502	T	C	-	0	0	0	1687	4	0.00236546	0	0	0	0	0	0	74240413	74240550	exon
Flna	chrX	74240545	T	C	-	1119	1	0.000892857	0	0	0	0	0	0	0	0	0	74240413	74240550	exon
Flna	chrX	74240891	T	C	-	0	0	0	0	0	0	64	2	0.030303	0	0	0	74240550	74241103	intron
Flna	chrX	74241139	T	C	-	0	0	0	0	0	0	0	0	0	1741	1	0.000574053	74241103	74241303	exon
Flna	chrX	74241162	T	C	-	0	0	0	0	0	0	1020	1	0.000979432	0	0	0	74241103	74241303	exon
Flna	chrX	74241169	T	C	-	0	0	0	0	0	0	0	0	0	1780	1	0.000561482	74241103	74241303	exon
Flna	chrX	74241192	T	C	-	1059	1	0.000943396	0	0	0	0	0	0	1994	1	0.000501253	74241103	74241303	exon
Flna	chrX	74241223	T	C	-	0	0	0	0	0	0	0	0	0	2084	1	0.000479616	74241103	74241303	exon
Flna	chrX	74241228	T	C	-	1052	2	0.00189753	0	0	0	1159	1	0.000862069	2035	2	0.000981836	74241103	74241303	exon
Flna	chrX	74241240	T	C	-	0	0	0	0	0	0	1143	1	0.000874126	0	0	0	74241103	74241303	exon
Flna	chrX	74241245	T	C	-	0	0	0	1297	1	0.000770416	0	0	0	0	0	0	74241103	74241303	exon
Flna	chrX	74241251	T	C	-	0	0	0	1317	1	0.000758725	0	0	0	2069	1	0.000483092	74241103	74241303	exon
Flna	chrX	74241252	T	C	-	0	0	0	1313	1	0.000761035	1207	2	0.00165426	0	0	0	74241103	74241303	exon
Flna	chrX	74241253	T	C	-	1077	1	0.000927644	0	0	0	0	0	0	2060	1	0.000485201	74241103	74241303	exon
Flna	chrX	74241260	T	C	-	0	0	0	0	0	0	0	0	0	2117	1	0.000472144	74241103	74241303	exon
Flna	chrX	74241270	T	C	-	0	0	0	1399	1	0.000714286	0	0	0	0	0	0	74241103	74241303	exon
Flna	chrX	74241288	T	C	-	0	0	0	1313	1	0.000761035	0	0	0	1981	2	0.00100857	74241103	74241303	exon
Flna	chrX	74241302	T	C	-	1055	1	0.00094697	0	0	0	0	0	0	0	0	0	74241103	74241303	exon
Flna	chrX	74241307	T	C	-	65	1	0.0151515	0	0	0	0	0	0	0	0	0	74241303	74241387	intron
Flna	chrX	74241322	T	C	-	0	0	0	0	0	0	75	1	0.0131579	0	0	0	74241303	74241387	intron
Flna	chrX	74241393	T	C	-	1108	1	0.000901713	0	0	0	0	0	0	0	0	0	74241387	74241549	exon
Flna	chrX	74241399	T	C	-	1139	1	0.000877193	0	0	0	0	0	0	0	0	0	74241387	74241549	exon
Flna	chrX	74241401	T	C	-	0	0	0	1432	1	0.000697837	0	0	0	0	0	0	74241387	74241549	exon
Flna	chrX	74241411	T	C	-	0	0	0	0	0	0	0	0	0	1935	1	0.000516529	74241387	74241549	exon
Flna	chrX	74241420	T	C	-	0	0	0	1550	1	0.000644745	0	0	0	0	0	0	74241387	74241549	exon
Flna	chrX	74241426	T	C	-	0	0	0	1516	1	0.000659196	0	0	0	0	0	0	74241387	74241549	exon
Flna	chrX	74241468	T	C	-	0	0	0	0	0	0	0	0	0	1969	2	0.00101471	74241387	74241549	exon
Flna	chrX	74241471	T	C	-	0	0	0	0	0	0	0	0	0	2013	1	0.000496524	74241387	74241549	exon
Flna	chrX	74241482	T	C	-	0	0	0	1392	2	0.00143472	0	0	0	0	0	0	74241387	74241549	exon
Flna	chrX	74241484	T	C	-	0	0	0	0	0	0	1234	1	0.000809717	0	0	0	74241387	74241549	exon
Flna	chrX	74241491	T	C	-	1163	1	0.000859107	1481	1	0.000674764	1273	1	0.000784929	0	0	0	74241387	74241549	exon
Flna	chrX	74241497	T	C	-	0	0	0	1420	1	0.00070373	0	0	0	2261	1	0.000442087	74241387	74241549	exon
Flna	chrX	74241503	T	C	-	0	0	0	1433	1	0.00069735	0	0	0	2251	1	0.00044405	74241387	74241549	exon
Flna	chrX	74241645	T	C	-	0	0	0	0	0	0	1338	2	0.00149254	0	0	0	74241643	74241720	exon
Flna	chrX	74241661	T	C	-	1240	1	0.000805802	0	0	0	0	0	0	0	0	0	74241643	74241720	exon
Flna	chrX	74241662	T	C	-	0	0	0	1612	1	0.000619963	0	0	0	0	0	0	74241643	74241720	exon
Flna	chrX	74241696	T	C	-	0	0	0	1499	2	0.00133245	0	0	0	0	0	0	74241643	74241720	exon
Flna	chrX	74241698	T	C	-	0	0	0	0	0	0	0	0	0	2220	1	0.000450248	74241643	74241720	exon
Flna	chrX	74241705	T	C	-	1203	2	0.00165975	0	0	0	0	0	0	0	0	0	74241643	74241720	exon
Flna	chrX	74241718	T	C	-	0	0	0	0	0	0	1258	1	0.000794281	0	0	0	74241643	74241720	exon
Flna	chrX	74241802	T	C	-	0	0	0	1493	2	0.00133779	0	0	0	0	0	0	74241801	74241919	exon
Flna	chrX	74241804	T	C	-	0	0	0	1507	1	0.00066313	1241	1	0.000805153	0	0	0	74241801	74241919	exon
Flna	chrX	74241805	T	C	-	0	0	0	0	0	0	0	0	0	2353	1	0.000424809	74241801	74241919	exon
Flna	chrX	74241808	T	C	-	0	0	0	0	0	0	0	0	0	2580	1	0.000387447	74241801	74241919	exon
Flna	chrX	74241811	T	C	-	1358	1	0.000735835	0	0	0	0	0	0	0	0	0	74241801	74241919	exon
Flna	chrX	74241819	T	C	-	0	0	0	1816	1	0.000550358	0	0	0	0	0	0	74241801	74241919	exon
Flna	chrX	74241823	T	C	-	0	0	0	0	0	0	1451	1	0.000688705	0	0	0	74241801	74241919	exon
Flna	chrX	74241826	T	C	-	0	0	0	1922	1	0.000520021	0	0	0	0	0	0	74241801	74241919	exon
Flna	chrX	74241832	T	C	-	0	0	0	0	0	0	1545	1	0.000646831	0	0	0	74241801	74241919	exon
Flna	chrX	74241834	T	C	-	0	0	0	1869	2	0.00106895	1522	1	0.000656599	0	0	0	74241801	74241919	exon
Flna	chrX	74241844	T	C	-	0	0	0	0	0	0	1545	2	0.00129282	0	0	0	74241801	74241919	exon
Flna	chrX	74241846	T	C	-	1572	1	0.000635728	0	0	0	0	0	0	3040	1	0.000328839	74241801	74241919	exon
Flna	chrX	74241860	T	C	-	0	0	0	0	0	0	0	0	0	3048	2	0.000655738	74241801	74241919	exon
Flna	chrX	74241866	T	C	-	1607	1	0.000621891	0	0	0	0	0	0	3151	1	0.000317259	74241801	74241919	exon
Flna	chrX	74241885	T	C	-	1549	1	0.000645161	0	0	0	0	0	0	0	0	0	74241801	74241919	exon
Flna	chrX	74241887	T	C	-	0	0	0	1952	2	0.00102354	0	0	0	0	0	0	74241801	74241919	exon
Flna	chrX	74241892	T	C	-	1469	1	0.000680272	0	0	0	0	0	0	0	0	0	74241801	74241919	exon
Flna	chrX	74241893	T	C	-	0	0	0	0	0	0	1693	1	0.000590319	0	0	0	74241801	74241919	exon
Flna	chrX	74241899	T	C	-	0	0	0	0	0	0	1733	1	0.000576701	3186	2	0.000627353	74241801	74241919	exon
Flna	chrX	74241902	T	C	-	1491	1	0.000670241	0	0	0	0	0	0	0	0	0	74241801	74241919	exon
Flna	chrX	74242166	T	C	-	0	0	0	0	0	0	19	1	0.05	0	0	0	74241919	74242492	intron
Flna	chrX	74242171	T	C	-	0	0	0	0	0	0	20	1	0.047619	0	0	0	74241919	74242492	intron
Flna	chrX	74242270	T	C	-	0	0	0	11	2	0.153846	0	0	0	0	0	0	74241919	74242492	intron
Flna	chrX	74242493	T	C	-	0	0	0	0	0	0	0	0	0	2543	2	0.000785855	74242492	74242639	exon
Flna	chrX	74242500	T	C	-	1129	1	0.000884956	0	0	0	0	0	0	0	0	0	74242492	74242639	exon
Flna	chrX	74242511	T	C	-	0	0	0	1432	2	0.0013947	0	0	0	2280	1	0.000438404	74242492	74242639	exon
Flna	chrX	74242521	T	C	-	0	0	0	1378	1	0.000725163	0	0	0	0	0	0	74242492	74242639	exon
Flna	chrX	74242564	T	C	-	0	0	0	0	0	0	1082	1	0.000923361	0	0	0	74242492	74242639	exon
Flna	chrX	74242572	T	C	-	0	0	0	0	0	0	0	0	0	1622	1	0.000616143	74242492	74242639	exon
Flna	chrX	74242585	T	C	-	852	1	0.00117233	0	0	0	0	0	0	0	0	0	74242492	74242639	exon
Flna	chrX	74242596	T	C	-	891	1	0.00112108	1103	1	0.000905797	0	0	0	0	0	0	74242492	74242639	exon
Flna	chrX	74242602	T	C	-	0	0	0	0	0	0	1238	1	0.000807103	0	0	0	74242492	74242639	exon
Flna	chrX	74242625	T	C	-	1363	2	0.0014652	0	0	0	0	0	0	0	0	0	74242492	74242639	exon
Flna	chrX	74242626	T	C	-	0	0	0	0	0	0	0	0	0	2703	1	0.000369822	74242492	74242639	exon
Flna	chrX	74242628	T	C	-	0	0	0	0	0	0	0	0	0	2708	1	0.00036914	74242492	74242639	exon
Flna	chrX	74242636	T	C	-	0	0	0	0	0	0	0	0	0	2815	1	0.000355114	74242492	74242639	exon
Flna	chrX	74242768	T	C	-	1428	1	0.00069979	0	0	0	1538	1	0.000649773	0	0	0	74242728	74242825	exon
Flna	chrX	74242781	T	C	-	1346	1	0.00074239	0	0	0	0	0	0	2743	1	0.000364431	74242728	74242825	exon
Flna	chrX	74242918	T	C	-	762	1	0.00131062	0	0	0	879	1	0.00113636	0	0	0	74242917	74243165	exon
Flna	chrX	74242931	T	C	-	0	0	0	1011	1	0.000988142	0	0	0	0	0	0	74242917	74243165	exon
Flna	chrX	74242959	T	C	-	0	0	0	0	0	0	0	0	0	1406	1	0.000710732	74242917	74243165	exon
Flna	chrX	74242967	T	C	-	0	0	0	0	0	0	0	0	0	1459	1	0.000684932	74242917	74243165	exon
Flna	chrX	74242974	T	C	-	0	0	0	0	0	0	0	0	0	1544	1	0.000647249	74242917	74243165	exon
Flna	chrX	74242986	T	C	-	0	0	0	1101	1	0.000907441	0	0	0	0	0	0	74242917	74243165	exon
Flna	chrX	74242996	T	C	-	840	1	0.00118906	0	0	0	0	0	0	0	0	0	74242917	74243165	exon
Flna	chrX	74243004	T	C	-	0	0	0	0	0	0	991	1	0.00100806	1758	1	0.000568505	74242917	74243165	exon
Flna	chrX	74243028	T	C	-	968	3	0.0030896	0	0	0	0	0	0	0	0	0	74242917	74243165	exon
Flna	chrX	74243040	T	C	-	0	0	0	0	0	0	1271	1	0.000786164	0	0	0	74242917	74243165	exon
Flna	chrX	74243048	T	C	-	0	0	0	0	0	0	0	0	0	2315	1	0.000431779	74242917	74243165	exon
Flna	chrX	74243054	T	C	-	0	0	0	1563	2	0.00127796	0	0	0	2327	2	0.000858738	74242917	74243165	exon
Flna	chrX	74243057	T	C	-	1165	1	0.000857633	0	0	0	0	0	0	2307	1	0.000433276	74242917	74243165	exon
Flna	chrX	74243066	T	C	-	0	0	0	0	0	0	1331	1	0.000750751	0	0	0	74242917	74243165	exon
Flna	chrX	74243079	T	C	-	0	0	0	0	0	0	0	0	0	2294	1	0.00043573	74242917	74243165	exon
Flna	chrX	74243086	T	C	-	0	0	0	0	0	0	1418	1	0.000704722	0	0	0	74242917	74243165	exon
Flna	chrX	74243118	T	C	-	0	0	0	0	0	0	0	0	0	2466	1	0.000405351	74242917	74243165	exon
Flna	chrX	74243125	T	C	-	0	0	0	0	0	0	0	0	0	2515	2	0.000794597	74242917	74243165	exon
Flna	chrX	74243135	T	C	-	0	0	0	0	0	0	1266	1	0.000789266	0	0	0	74242917	74243165	exon
Flna	chrX	74243143	T	C	-	985	2	0.00202634	0	0	0	0	0	0	0	0	0	74242917	74243165	exon
Flna	chrX	74243159	T	C	-	0	0	0	1505	1	0.000664011	1248	2	0.0016	2347	1	0.000425894	74242917	74243165	exon
Flna	chrX	74243160	T	C	-	1110	1	0.00090009	1501	1	0.000665779	0	0	0	0	0	0	74242917	74243165	exon
Flna	chrX	74243163	T	C	-	0	0	0	0	0	0	1327	1	0.000753012	2537	2	0.000787712	74242917	74243165	exon
Flna	chrX	74243930	T	C	-	0	0	0	12	1	0.0769231	0	0	0	0	0	0	74243165	74246064	intron
Flna	chrX	74243935	T	C	-	0	0	0	13	1	0.0714286	0	0	0	0	0	0	74243165	74246064	intron
Flna	chrX	74244436	T	C	-	32	1	0.030303	0	0	0	0	0	0	0	0	0	74243165	74246064	intron
Flna	chrX	74244502	T	C	-	32	1	0.030303	0	0	0	0	0	0	0	0	0	74243165	74246064	intron
Flna	chrX	74244663	T	C	-	0	0	0	0	0	0	0	0	0	30	1	0.0322581	74243165	74246064	intron
Flna	chrX	74244825	T	C	-	0	0	0	0	0	0	0	0	0	10	2	0.166667	74243165	74246064	intron
Flna	chrX	74244827	T	C	-	0	0	0	0	0	0	0	0	0	18	1	0.0526316	74243165	74246064	intron
Flna	chrX	74245441	T	C	-	0	0	0	24	1	0.04	0	0	0	0	0	0	74243165	74246064	intron
Flna	chrX	74245768	T	C	-	0	0	0	0	0	0	0	0	0	46	1	0.0212766	74243165	74246064	intron
Flna	chrX	74246048	T	C	-	0	0	0	0	0	0	0	0	0	42	1	0.0232558	74243165	74246064	intron
Flna	chrX	74246055	T	C	-	0	18	1	0	29	1	0	28	1	0	33	1	74243165	74246064	intron
Flna	chrX	74246067	T	C	-	0	0	0	0	0	0	0	0	0	2494	1	0.000400802	74246064	74246436	exon
Flna	chrX	74246079	T	C	-	0	0	0	0	0	0	0	0	0	2467	2	0.000810045	74246064	74246436	exon
Flna	chrX	74246087	T	C	-	0	0	0	1534	1	0.000651466	1315	1	0.000759878	0	0	0	74246064	74246436	exon
Flna	chrX	74246102	T	C	-	0	0	0	0	0	0	0	0	0	2666	2	0.000749625	74246064	74246436	exon
Flna	chrX	74246122	T	C	-	0	0	0	0	0	0	1664	1	0.000600601	0	0	0	74246064	74246436	exon
Flna	chrX	74246123	T	C	-	0	0	0	1965	1	0.000508647	0	0	0	0	0	0	74246064	74246436	exon
Flna	chrX	74246129	T	C	-	1528	2	0.00130719	0	0	0	0	0	0	0	0	0	74246064	74246436	exon
Flna	chrX	74246135	T	C	-	0	0	0	1985	1	0.000503525	0	0	0	0	0	0	74246064	74246436	exon
Flna	chrX	74246151	T	C	-	0	0	0	2427	1	0.000411862	0	0	0	0	0	0	74246064	74246436	exon
Flna	chrX	74246156	T	C	-	0	0	0	0	0	0	1949	1	0.000512821	0	0	0	74246064	74246436	exon
Flna	chrX	74246162	T	C	-	0	0	0	0	0	0	1823	2	0.00109589	0	0	0	74246064	74246436	exon
Flna	chrX	74246168	T	C	-	0	0	0	0	0	0	0	0	0	3437	1	0.000290867	74246064	74246436	exon
Flna	chrX	74246173	T	C	-	1665	1	0.00060024	0	0	0	0	0	0	0	0	0	74246064	74246436	exon
Flna	chrX	74246174	T	C	-	0	0	0	0	0	0	0	0	0	3522	1	0.000283849	74246064	74246436	exon
Flna	chrX	74246184	T	C	-	0	0	0	2383	1	0.000419463	0	0	0	0	0	0	74246064	74246436	exon
Flna	chrX	74246192	T	C	-	0	0	0	2385	1	0.000419111	0	0	0	0	0	0	74246064	74246436	exon
Flna	chrX	74246205	T	C	-	1571	1	0.000636132	0	0	0	0	0	0	3261	2	0.000612933	74246064	74246436	exon
Flna	chrX	74246219	T	C	-	1276	1	0.000783085	0	0	0	0	0	0	0	0	0	74246064	74246436	exon
Flna	chrX	74246228	T	C	-	0	0	0	2053	1	0.000486855	0	0	0	0	0	0	74246064	74246436	exon
Flna	chrX	74246232	T	C	-	1418	1	0.000704722	0	0	0	1733	1	0.000576701	0	0	0	74246064	74246436	exon
Flna	chrX	74246241	T	C	-	0	0	0	0	0	0	1850	1	0.000540249	0	0	0	74246064	74246436	exon
Flna	chrX	74246247	T	C	-	0	0	0	2016	1	0.000495786	0	0	0	0	0	0	74246064	74246436	exon
Flna	chrX	74246253	T	C	-	0	0	0	0	0	0	1688	1	0.000592066	0	0	0	74246064	74246436	exon
Flna	chrX	74246264	T	C	-	0	0	0	0	0	0	0	0	0	2706	1	0.000369413	74246064	74246436	exon
Flna	chrX	74246289	T	C	-	0	0	0	0	0	0	0	0	0	3237	1	0.000308833	74246064	74246436	exon
Flna	chrX	74246300	T	C	-	0	0	0	0	0	0	0	0	0	4014	1	0.000249066	74246064	74246436	exon
Flna	chrX	74246303	T	C	-	0	0	0	0	0	0	2545	1	0.000392773	4227	1	0.000236518	74246064	74246436	exon
Flna	chrX	74246308	T	C	-	0	0	0	0	0	0	0	0	0	4265	1	0.000234412	74246064	74246436	exon
Flna	chrX	74246309	T	C	-	2017	1	0.00049554	2909	1	0.000343643	2575	1	0.000388199	0	0	0	74246064	74246436	exon
Flna	chrX	74246313	T	C	-	0	0	0	2881	1	0.000346981	0	0	0	0	0	0	74246064	74246436	exon
Flna	chrX	74246320	T	C	-	2002	1	0.000499251	0	0	0	0	0	0	0	0	0	74246064	74246436	exon
Flna	chrX	74246326	T	C	-	0	0	0	0	0	0	0	0	0	4070	1	0.00024564	74246064	74246436	exon
Flna	chrX	74246327	T	C	-	0	0	0	0	0	0	2495	1	0.000400641	0	0	0	74246064	74246436	exon
Flna	chrX	74246336	T	C	-	0	0	0	0	0	0	2378	1	0.000420345	0	0	0	74246064	74246436	exon
Flna	chrX	74246338	T	C	-	0	0	0	0	0	0	2232	5	0.00223514	0	0	0	74246064	74246436	exon
Flna	chrX	74246339	T	C	-	0	0	0	0	0	0	0	0	0	3875	1	0.000257998	74246064	74246436	exon
Flna	chrX	74246341	T	C	-	0	0	0	2684	1	0.000372439	2343	1	0.000426621	0	0	0	74246064	74246436	exon
Flna	chrX	74246355	T	C	-	0	0	0	0	0	0	0	0	0	3711	2	0.000538648	74246064	74246436	exon
Flna	chrX	74246357	T	C	-	0	0	0	2584	1	0.000386847	2292	2	0.00087184	0	0	0	74246064	74246436	exon
Flna	chrX	74246368	T	C	-	0	0	0	0	0	0	2178	1	0.000458926	3490	1	0.000286451	74246064	74246436	exon
Flna	chrX	74246474	T	C	-	0	0	0	437	1	0.00228311	0	0	0	0	0	0	74246436	74246534	5 UTR
Flna	chrX	74246497	T	C	-	0	0	0	397	1	0.00251256	0	0	0	0	0	0	74246436	74246534	5 UTR
Flna	chrX	74246514	T	C	-	0	0	0	390	1	0.00255754	283	1	0.00352113	0	0	0	74246436	74246534	5 UTR
Flna	chrX	74246548	T	C	-	0	0	0	0	0	0	0	0	0	184	1	0.00540541	74246534	74247534	promoter
Flnb	chr14	7936048	A	G	+	354	448	0.558603	539	578	0.517457	0	0	0	864	463	0.348907	7935934	7936049	exon
Flnb	chr14	7782641	A	G	+	0	0	0	0	1	1	0	1	1	0	0	0	7767957	7816957	5 distal
Flnb	chr14	7801444	A	G	+	0	2	1	0	0	0	0	0	0	0	0	0	7767957	7816957	5 distal
Flnb	chr14	7808914	A	G	+	0	1	1	0	0	0	0	0	0	0	0	0	7767957	7816957	5 distal
Flnb	chr14	7813025	A	G	+	0	0	0	0	1	1	0	0	0	0	0	0	7767957	7816957	5 distal
Flnb	chr14	7813074	A	G	+	0	1	1	0	0	0	0	0	0	0	0	0	7767957	7816957	5 distal
Flnb	chr14	7814382	A	G	+	0	1	1	0	0	0	0	0	0	0	0	0	7767957	7816957	5 distal
Flnb	chr14	7817053	A	G	+	0	0	0	0	0	0	1	1	0.5	0	0	0	7816957	7817957	promoter
Flnb	chr14	7818008	A	G	+	147	1	0.00675676	0	0	0	0	0	0	175	1	0.00568182	7817957	7818152	5 UTR
Flnb	chr14	7818033	A	G	+	0	0	0	0	0	0	675	1	0.00147929	0	0	0	7817957	7818152	5 UTR
Flnb	chr14	7818051	A	G	+	0	0	0	1114	1	0.000896861	0	0	0	0	0	0	7817957	7818152	5 UTR
Flnb	chr14	7818072	A	G	+	1076	1	0.000928505	0	0	0	0	0	0	0	0	0	7817957	7818152	5 UTR
Flnb	chr14	7818109	A	G	+	1399	2	0.00142755	0	0	0	0	0	0	0	0	0	7817957	7818152	5 UTR
Flnb	chr14	7818149	A	G	+	1120	1	0.000892061	1346	1	0.00074239	0	0	0	0	0	0	7817957	7818152	5 UTR
Flnb	chr14	7818171	A	G	+	1198	1	0.000834028	0	0	0	0	0	0	0	0	0	7818152	7818443	exon
Flnb	chr14	7818180	A	G	+	0	0	0	1592	1	0.000627746	0	0	0	1961	1	0.000509684	7818152	7818443	exon
Flnb	chr14	7818198	A	G	+	1405	1	0.000711238	0	0	0	0	0	0	2087	2	0.000957396	7818152	7818443	exon
Flnb	chr14	7818204	A	G	+	1417	1	0.000705219	1709	2	0.00116891	0	0	0	2071	2	0.000964785	7818152	7818443	exon
Flnb	chr14	7818207	A	G	+	1261	1	0.000792393	1519	1	0.000657895	0	0	0	0	0	0	7818152	7818443	exon
Flnb	chr14	7818209	A	G	+	0	0	0	0	0	0	0	0	0	1777	2	0.00112423	7818152	7818443	exon
Flnb	chr14	7818237	A	G	+	0	0	0	0	0	0	0	0	0	1687	1	0.000592417	7818152	7818443	exon
Flnb	chr14	7818243	A	G	+	0	0	0	1411	1	0.000708215	0	0	0	0	0	0	7818152	7818443	exon
Flnb	chr14	7818252	A	G	+	0	0	0	1485	1	0.000672948	0	0	0	0	0	0	7818152	7818443	exon
Flnb	chr14	7818273	A	G	+	1311	1	0.000762195	1691	1	0.000591017	0	0	0	0	0	0	7818152	7818443	exon
Flnb	chr14	7818275	A	G	+	0	0	0	0	0	0	1168	1	0.000855432	0	0	0	7818152	7818443	exon
Flnb	chr14	7818284	A	G	+	0	0	0	0	0	0	0	0	0	1625	1	0.000615006	7818152	7818443	exon
Flnb	chr14	7818295	A	G	+	1065	1	0.000938086	0	0	0	992	1	0.00100705	0	0	0	7818152	7818443	exon
Flnb	chr14	7818335	A	G	+	1125	1	0.000888099	0	0	0	0	0	0	0	0	0	7818152	7818443	exon
Flnb	chr14	7818345	A	G	+	1130	1	0.000884173	0	0	0	0	0	0	1646	2	0.00121359	7818152	7818443	exon
Flnb	chr14	7818354	A	G	+	0	0	0	0	0	0	0	0	0	1604	2	0.00124533	7818152	7818443	exon
Flnb	chr14	7818362	A	G	+	742	1	0.0013459	0	0	0	0	0	0	0	0	0	7818152	7818443	exon
Flnb	chr14	7818420	A	G	+	0	0	0	0	0	0	0	0	0	1070	1	0.000933707	7818152	7818443	exon
Flnb	chr14	7818541	A	G	+	0	0	0	0	0	0	0	0	0	48	1	0.0204082	7818443	7867537	intron
Flnb	chr14	7819018	A	G	+	0	0	0	0	0	0	41	1	0.0238095	0	0	0	7818443	7867537	intron
Flnb	chr14	7819047	A	G	+	53	1	0.0185185	0	0	0	0	0	0	0	0	0	7818443	7867537	intron
Flnb	chr14	7820048	A	G	+	0	1	1	0	0	0	0	0	0	0	1	1	7818443	7867537	intron
Flnb	chr14	7820059	A	G	+	0	0	0	0	0	0	0	0	0	0	1	1	7818443	7867537	intron
Flnb	chr14	7820095	A	G	+	0	1	1	0	1	1	0	1	1	0	0	0	7818443	7867537	intron
Flnb	chr14	7820108	A	G	+	0	2	1	0	1	1	0	2	1	0	2	1	7818443	7867537	intron
Flnb	chr14	7820365	A	G	+	23	1	0.0416667	0	0	0	0	0	0	0	0	0	7818443	7867537	intron
Flnb	chr14	7820707	A	G	+	33	1	0.0294118	0	0	0	0	0	0	0	0	0	7818443	7867537	intron
Flnb	chr14	7821606	A	G	+	37	1	0.0263158	0	0	0	0	0	0	0	0	0	7818443	7867537	intron
Flnb	chr14	7822042	A	G	+	0	0	0	0	0	0	35	1	0.0277778	0	0	0	7818443	7867537	intron
Flnb	chr14	7822341	A	G	+	0	0	0	19	1	0.05	0	0	0	0	0	0	7818443	7867537	intron
Flnb	chr14	7822424	A	G	+	0	0	0	0	0	0	0	0	0	31	1	0.03125	7818443	7867537	intron
Flnb	chr14	7822696	A	G	+	0	0	0	0	0	0	0	0	0	30	1	0.0322581	7818443	7867537	intron
Flnb	chr14	7822791	A	G	+	0	19	1	0	9	1	0	21	1	0	14	1	7818443	7867537	intron
Flnb	chr14	7823741	A	G	+	35	1	0.0277778	25	1	0.0384615	0	0	0	0	0	0	7818443	7867537	intron
Flnb	chr14	7824314	A	G	+	0	22	1	0	9	1	0	24	1	0	23	1	7818443	7867537	intron
Flnb	chr14	7824570	A	G	+	21	1	0.0454545	0	0	0	0	0	0	0	0	0	7818443	7867537	intron
Flnb	chr14	7824856	A	G	+	0	0	0	0	0	0	0	0	0	53	1	0.0185185	7818443	7867537	intron
Flnb	chr14	7824881	A	G	+	36	1	0.027027	0	0	0	0	0	0	0	0	0	7818443	7867537	intron
Flnb	chr14	7825740	A	G	+	39	1	0.025	0	0	0	0	0	0	0	0	0	7818443	7867537	intron
Flnb	chr14	7825796	A	G	+	0	0	0	0	0	0	0	0	0	50	1	0.0196078	7818443	7867537	intron
Flnb	chr14	7826144	A	G	+	0	51	1	0	27	1	0	34	1	0	38	1	7818443	7867537	intron
Flnb	chr14	7826307	A	G	+	0	0	0	0	0	0	0	0	0	30	1	0.0322581	7818443	7867537	intron
Flnb	chr14	7826719	A	G	+	0	0	0	0	0	0	0	0	0	24	1	0.04	7818443	7867537	intron
Flnb	chr14	7826976	A	G	+	40	1	0.0243902	0	0	0	0	0	0	0	0	0	7818443	7867537	intron
Flnb	chr14	7826982	A	G	+	0	0	0	0	0	0	28	1	0.0344828	0	0	0	7818443	7867537	intron
Flnb	chr14	7827290	A	G	+	0	0	0	15	1	0.0625	0	0	0	0	0	0	7818443	7867537	intron
Flnb	chr14	7827320	A	G	+	0	22	1	0	14	1	0	28	1	0	24	1	7818443	7867537	intron
Flnb	chr14	7827416	A	G	+	37	1	0.0263158	0	0	0	0	0	0	0	0	0	7818443	7867537	intron
Flnb	chr14	7827837	A	G	+	0	0	0	0	0	0	22	1	0.0434783	0	0	0	7818443	7867537	intron
Flnb	chr14	7828082	A	G	+	33	1	0.0294118	0	0	0	0	0	0	0	0	0	7818443	7867537	intron
Flnb	chr14	7828143	A	G	+	38	1	0.025641	0	0	0	0	0	0	0	0	0	7818443	7867537	intron
Flnb	chr14	7828151	A	G	+	37	1	0.0263158	0	0	0	0	0	0	0	0	0	7818443	7867537	intron
Flnb	chr14	7828157	A	G	+	0	0	0	0	0	0	0	0	0	58	1	0.0169492	7818443	7867537	intron
Flnb	chr14	7828226	A	G	+	0	0	0	0	0	0	0	0	0	42	1	0.0232558	7818443	7867537	intron
Flnb	chr14	7828341	A	G	+	20	1	0.047619	0	0	0	0	0	0	0	0	0	7818443	7867537	intron
Flnb	chr14	7828580	A	G	+	0	0	0	0	0	0	0	0	0	33	1	0.0294118	7818443	7867537	intron
Flnb	chr14	7828613	A	G	+	0	0	0	0	0	0	0	0	0	30	1	0.0322581	7818443	7867537	intron
Flnb	chr14	7828643	A	G	+	0	0	0	0	0	0	26	1	0.037037	32	3	0.0857143	7818443	7867537	intron
Flnb	chr14	7828868	A	G	+	0	0	0	8	1	0.111111	19	1	0.05	0	0	0	7818443	7867537	intron
Flnb	chr14	7828870	A	G	+	0	0	0	0	0	0	0	0	0	14	1	0.0666667	7818443	7867537	intron
Flnb	chr14	7828947	A	G	+	39	1	0.025	0	0	0	0	0	0	0	0	0	7818443	7867537	intron
Flnb	chr14	7828978	A	G	+	40	1	0.0243902	20	2	0.0909091	34	1	0.0285714	40	3	0.0697674	7818443	7867537	intron
Flnb	chr14	7828984	A	G	+	0	0	0	21	1	0.0454545	0	0	0	0	0	0	7818443	7867537	intron
Flnb	chr14	7828985	A	G	+	0	0	0	20	1	0.047619	0	0	0	0	0	0	7818443	7867537	intron
Flnb	chr14	7829022	A	G	+	34	1	0.0285714	0	0	0	0	0	0	0	0	0	7818443	7867537	intron
Flnb	chr14	7829025	A	G	+	33	1	0.0294118	0	0	0	0	0	0	37	2	0.0512821	7818443	7867537	intron
Flnb	chr14	7829236	A	G	+	0	0	0	5	1	0.166667	0	0	0	0	0	0	7818443	7867537	intron
Flnb	chr14	7829255	A	G	+	0	15	1	0	8	1	0	10	1	0	15	1	7818443	7867537	intron
Flnb	chr14	7829711	A	G	+	0	22	1	0	13	1	0	14	1	0	22	1	7818443	7867537	intron
Flnb	chr14	7830381	A	G	+	26	1	0.037037	7	1	0.125	25	1	0.0384615	0	0	0	7818443	7867537	intron
Flnb	chr14	7830656	A	G	+	21	1	0.0454545	0	0	0	0	0	0	0	0	0	7818443	7867537	intron
Flnb	chr14	7830707	A	G	+	0	0	0	0	0	0	0	0	0	23	1	0.0416667	7818443	7867537	intron
Flnb	chr14	7830778	A	G	+	0	0	0	0	0	0	0	0	0	30	1	0.0322581	7818443	7867537	intron
Flnb	chr14	7830781	A	G	+	20	1	0.047619	0	0	0	0	0	0	0	0	0	7818443	7867537	intron
Flnb	chr14	7831358	A	G	+	33	1	0.0294118	0	0	0	0	0	0	0	0	0	7818443	7867537	intron
Flnb	chr14	7833093	A	G	+	13	1	0.0714286	0	0	0	0	0	0	0	0	0	7818443	7867537	intron
Flnb	chr14	7833107	A	G	+	16	1	0.0588235	0	0	0	0	0	0	0	0	0	7818443	7867537	intron
Flnb	chr14	7833141	A	G	+	22	2	0.0833333	0	0	0	10	3	0.230769	0	0	0	7818443	7867537	intron
Flnb	chr14	7833158	A	G	+	25	1	0.0384615	0	0	0	0	0	0	0	0	0	7818443	7867537	intron
Flnb	chr14	7833305	A	G	+	0	0	0	22	1	0.0434783	0	0	0	0	0	0	7818443	7867537	intron
Flnb	chr14	7833707	A	G	+	0	0	0	0	0	0	24	1	0.04	0	0	0	7818443	7867537	intron
Flnb	chr14	7833958	A	G	+	22	1	0.0434783	0	0	0	0	0	0	0	0	0	7818443	7867537	intron
Flnb	chr14	7834102	A	G	+	0	0	0	14	1	0.0666667	0	0	0	0	0	0	7818443	7867537	intron
Flnb	chr14	7834750	A	G	+	26	1	0.037037	0	0	0	0	0	0	0	0	0	7818443	7867537	intron
Flnb	chr14	7835809	A	G	+	32	1	0.030303	0	0	0	0	0	0	0	0	0	7818443	7867537	intron
Flnb	chr14	7836391	A	G	+	0	6	1	0	3	1	0	13	1	1	12	0.923077	7818443	7867537	intron
Flnb	chr14	7836393	A	G	+	6	1	0.142857	0	0	0	0	0	0	0	0	0	7818443	7867537	intron
Flnb	chr14	7836461	A	G	+	0	0	0	8	1	0.111111	0	0	0	0	0	0	7818443	7867537	intron
Flnb	chr14	7837199	A	G	+	32	1	0.030303	0	0	0	0	0	0	0	0	0	7818443	7867537	intron
Flnb	chr14	7837388	A	G	+	0	0	0	0	0	0	20	1	0.047619	26	1	0.037037	7818443	7867537	intron
Flnb	chr14	7837548	A	G	+	0	0	0	0	0	0	0	0	0	28	2	0.0666667	7818443	7867537	intron
Flnb	chr14	7837613	A	G	+	0	0	0	0	0	0	0	0	0	33	1	0.0294118	7818443	7867537	intron
Flnb	chr14	7837643	A	G	+	0	0	0	0	0	0	36	1	0.027027	0	0	0	7818443	7867537	intron
Flnb	chr14	7838378	A	G	+	0	0	0	0	0	0	0	0	0	23	1	0.0416667	7818443	7867537	intron
Flnb	chr14	7838909	A	G	+	0	12	1	0	8	1	0	12	1	0	19	1	7818443	7867537	intron
Flnb	chr14	7839638	A	G	+	0	0	0	15	1	0.0625	0	0	0	0	0	0	7818443	7867537	intron
Flnb	chr14	7839908	A	G	+	10	1	0.0909091	0	0	0	0	0	0	0	0	0	7818443	7867537	intron
Flnb	chr14	7840514	A	G	+	0	0	0	0	0	0	21	1	0.0454545	0	0	0	7818443	7867537	intron
Flnb	chr14	7840794	A	G	+	0	1	1	0	0	0	0	1	1	0	2	1	7818443	7867537	intron
Flnb	chr14	7840800	A	G	+	0	1	1	0	1	1	0	0	0	1	2	0.666667	7818443	7867537	intron
Flnb	chr14	7840804	A	G	+	0	1	1	0	0	0	0	0	0	3	1	0.25	7818443	7867537	intron
Flnb	chr14	7841053	A	G	+	31	1	0.03125	0	0	0	0	0	0	0	0	0	7818443	7867537	intron
Flnb	chr14	7841086	A	G	+	30	1	0.0322581	0	0	0	0	0	0	0	0	0	7818443	7867537	intron
Flnb	chr14	7841525	A	G	+	0	0	0	0	0	0	0	0	0	18	1	0.0526316	7818443	7867537	intron
Flnb	chr14	7841904	A	G	+	0	0	0	0	0	0	27	1	0.0357143	0	0	0	7818443	7867537	intron
Flnb	chr14	7843204	A	G	+	0	0	0	0	0	0	19	1	0.05	0	0	0	7818443	7867537	intron
Flnb	chr14	7844027	A	G	+	19	1	0.05	0	0	0	0	0	0	0	0	0	7818443	7867537	intron
Flnb	chr14	7845143	A	G	+	18	1	0.0526316	0	0	0	0	0	0	0	0	0	7818443	7867537	intron
Flnb	chr14	7845764	A	G	+	19	1	0.05	0	0	0	0	0	0	0	0	0	7818443	7867537	intron
Flnb	chr14	7846112	A	G	+	0	0	0	0	0	0	6	1	0.142857	0	0	0	7818443	7867537	intron
Flnb	chr14	7846157	A	G	+	0	0	0	0	0	0	0	0	0	18	1	0.0526316	7818443	7867537	intron
Flnb	chr14	7848665	A	G	+	27	1	0.0357143	0	0	0	0	0	0	0	0	0	7818443	7867537	intron
Flnb	chr14	7848866	A	G	+	0	0	0	10	1	0.0909091	0	0	0	0	0	0	7818443	7867537	intron
Flnb	chr14	7849240	A	G	+	14	1	0.0666667	0	0	0	0	0	0	0	0	0	7818443	7867537	intron
Flnb	chr14	7849638	A	G	+	0	0	0	0	0	0	0	0	0	15	1	0.0625	7818443	7867537	intron
Flnb	chr14	7849655	A	G	+	0	0	0	9	1	0.1	0	0	0	0	0	0	7818443	7867537	intron
Flnb	chr14	7850461	A	G	+	19	1	0.05	0	0	0	0	0	0	0	0	0	7818443	7867537	intron
Flnb	chr14	7850690	A	G	+	0	0	0	0	0	0	5	1	0.166667	0	0	0	7818443	7867537	intron
Flnb	chr14	7851156	A	G	+	23	1	0.0416667	0	0	0	0	0	0	0	0	0	7818443	7867537	intron
Flnb	chr14	7852191	A	G	+	0	6	1	0	4	1	0	5	1	1	4	0.8	7818443	7867537	intron
Flnb	chr14	7852817	A	G	+	21	1	0.0454545	0	0	0	0	0	0	0	0	0	7818443	7867537	intron
Flnb	chr14	7853035	A	G	+	18	1	0.0526316	0	0	0	0	0	0	0	0	0	7818443	7867537	intron
Flnb	chr14	7853155	A	G	+	0	0	0	0	0	0	12	1	0.0769231	0	0	0	7818443	7867537	intron
Flnb	chr14	7853436	A	G	+	0	20	1	0	17	1	0	21	1	0	13	1	7818443	7867537	intron
Flnb	chr14	7853746	A	G	+	0	0	0	0	0	0	21	1	0.0454545	0	0	0	7818443	7867537	intron
Flnb	chr14	7854032	A	G	+	0	17	1	0	10	1	0	12	1	0	17	1	7818443	7867537	intron
Flnb	chr14	7854039	A	G	+	19	1	0.05	0	0	0	0	0	0	0	0	0	7818443	7867537	intron
Flnb	chr14	7854047	A	G	+	15	1	0.0625	0	0	0	0	0	0	0	0	0	7818443	7867537	intron
Flnb	chr14	7854712	A	G	+	0	0	0	0	0	0	27	1	0.0357143	0	0	0	7818443	7867537	intron
Flnb	chr14	7854992	A	G	+	0	0	0	0	0	0	11	1	0.0833333	0	0	0	7818443	7867537	intron
Flnb	chr14	7855098	A	G	+	25	1	0.0384615	0	0	0	0	0	0	0	0	0	7818443	7867537	intron
Flnb	chr14	7855376	A	G	+	8	1	0.111111	0	0	0	0	0	0	0	0	0	7818443	7867537	intron
Flnb	chr14	7855419	A	G	+	0	0	0	0	0	0	0	0	0	13	1	0.0714286	7818443	7867537	intron
Flnb	chr14	7855591	A	G	+	6	1	0.142857	0	0	0	0	0	0	0	0	0	7818443	7867537	intron
Flnb	chr14	7855839	A	G	+	0	0	0	0	0	0	12	1	0.0769231	0	0	0	7818443	7867537	intron
Flnb	chr14	7855944	A	G	+	0	0	0	0	0	0	0	0	0	18	1	0.0526316	7818443	7867537	intron
Flnb	chr14	7857636	A	G	+	0	7	1	0	3	1	0	11	1	0	9	1	7818443	7867537	intron
Flnb	chr14	7858710	A	G	+	0	15	1	0	11	1	0	23	1	0	17	1	7818443	7867537	intron
Flnb	chr14	7859306	A	G	+	0	18	1	0	8	1	0	13	1	0	16	1	7818443	7867537	intron
Flnb	chr14	7859863	A	G	+	0	0	0	0	0	0	14	1	0.0666667	0	0	0	7818443	7867537	intron
Flnb	chr14	7860032	A	G	+	0	0	0	0	0	0	6	1	0.142857	7	1	0.125	7818443	7867537	intron
Flnb	chr14	7860342	A	G	+	0	12	1	0	1	1	0	9	1	0	6	1	7818443	7867537	intron
Flnb	chr14	7860839	A	G	+	0	18	1	0	3	1	0	16	1	0	14	1	7818443	7867537	intron
Flnb	chr14	7862651	A	G	+	14	1	0.0666667	0	0	0	0	0	0	0	0	0	7818443	7867537	intron
Flnb	chr14	7862881	A	G	+	0	0	0	0	0	0	0	0	0	11	1	0.0833333	7818443	7867537	intron
Flnb	chr14	7865312	A	G	+	15	1	0.0625	0	0	0	0	0	0	0	0	0	7818443	7867537	intron
Flnb	chr14	7867537	A	G	+	692	1	0.001443	0	0	0	0	0	0	0	0	0	7867537	7867785	exon
Flnb	chr14	7867539	A	G	+	0	0	0	0	0	0	0	0	0	1136	1	0.000879507	7867537	7867785	exon
Flnb	chr14	7867543	A	G	+	0	0	0	0	0	0	0	0	0	1159	1	0.000862069	7867537	7867785	exon
Flnb	chr14	7867567	A	G	+	0	0	0	0	0	0	0	0	0	1478	1	0.000676133	7867537	7867785	exon
Flnb	chr14	7867633	A	G	+	895	1	0.00111607	0	0	0	0	0	0	0	0	0	7867537	7867785	exon
Flnb	chr14	7867648	A	G	+	0	0	0	0	0	0	0	0	0	1528	1	0.000654022	7867537	7867785	exon
Flnb	chr14	7867664	A	G	+	0	0	0	0	0	0	0	0	0	1290	2	0.00154799	7867537	7867785	exon
Flnb	chr14	7867667	A	G	+	0	0	0	1109	1	0.000900901	0	0	0	1287	1	0.000776398	7867537	7867785	exon
Flnb	chr14	7867672	A	G	+	0	0	0	0	0	0	0	0	0	1337	1	0.000747384	7867537	7867785	exon
Flnb	chr14	7867685	A	G	+	969	1	0.00103093	0	0	0	842	1	0.00118624	0	0	0	7867537	7867785	exon
Flnb	chr14	7867701	A	G	+	0	0	0	0	0	0	949	1	0.00105263	1606	1	0.000622278	7867537	7867785	exon
Flnb	chr14	7867708	A	G	+	0	0	0	1426	1	0.000700771	0	0	0	0	0	0	7867537	7867785	exon
Flnb	chr14	7867723	A	G	+	1268	1	0.000788022	0	0	0	0	0	0	0	0	0	7867537	7867785	exon
Flnb	chr14	7867751	A	G	+	0	0	0	0	0	0	1127	3	0.00265487	0	0	0	7867537	7867785	exon
Flnb	chr14	7867757	A	G	+	0	0	0	0	0	0	1176	1	0.000849618	1959	1	0.000510204	7867537	7867785	exon
Flnb	chr14	7867773	A	G	+	0	0	0	1957	1	0.000510725	0	0	0	0	0	0	7867537	7867785	exon
Flnb	chr14	7867784	A	G	+	0	0	0	0	0	0	1368	1	0.00073046	2197	1	0.000454959	7867537	7867785	exon
Flnb	chr14	7869452	A	G	+	13	1	0.0714286	0	0	0	8	1	0.111111	0	0	0	7867785	7869780	intron
Flnb	chr14	7869466	A	G	+	14	1	0.0666667	0	0	0	0	0	0	0	0	0	7867785	7869780	intron
Flnb	chr14	7869471	A	G	+	14	1	0.0666667	0	0	0	0	0	0	0	0	0	7867785	7869780	intron
Flnb	chr14	7869792	A	G	+	0	0	0	0	0	0	1269	1	0.000787402	0	0	0	7869780	7869877	exon
Flnb	chr14	7869807	A	G	+	0	0	0	0	0	0	0	0	0	2112	1	0.000473261	7869780	7869877	exon
Flnb	chr14	7869816	A	G	+	0	0	0	1766	1	0.000565931	0	0	0	2099	1	0.00047619	7869780	7869877	exon
Flnb	chr14	7869835	A	G	+	1498	2	0.00133333	0	0	0	0	0	0	0	0	0	7869780	7869877	exon
Flnb	chr14	7869838	A	G	+	1427	1	0.00070028	0	0	0	0	0	0	0	0	0	7869780	7869877	exon
Flnb	chr14	7869846	A	G	+	1381	1	0.000723589	0	0	0	0	0	0	0	0	0	7869780	7869877	exon
Flnb	chr14	7869849	A	G	+	1379	2	0.00144823	0	0	0	0	0	0	1962	1	0.000509424	7869780	7869877	exon
Flnb	chr14	7869876	A	G	+	1293	3	0.00231481	0	0	0	0	0	0	1800	1	0.000555247	7869780	7869877	exon
Flnb	chr14	7869967	A	G	+	0	33	1	0	26	1	0	28	1	0	47	1	7869877	7873345	intron
Flnb	chr14	7872109	A	G	+	34	1	0.0285714	0	0	0	0	0	0	0	0	0	7869877	7873345	intron
Flnb	chr14	7872553	A	G	+	0	0	0	0	0	0	11	3	0.214286	0	0	0	7869877	7873345	intron
Flnb	chr14	7872689	A	G	+	0	6	1	0	1	1	0	0	0	0	4	1	7869877	7873345	intron
Flnb	chr14	7873348	A	G	+	1288	1	0.000775795	0	0	0	0	0	0	0	0	0	7873345	7873492	exon
Flnb	chr14	7873358	A	G	+	0	0	0	0	0	0	1250	2	0.00159744	0	0	0	7873345	7873492	exon
Flnb	chr14	7873382	A	G	+	1448	1	0.000690131	0	0	0	0	0	0	0	0	0	7873345	7873492	exon
Flnb	chr14	7873385	A	G	+	0	0	0	0	0	0	0	0	0	2027	1	0.000493097	7873345	7873492	exon
Flnb	chr14	7873396	A	G	+	0	0	0	0	0	0	1252	1	0.000798085	0	0	0	7873345	7873492	exon
Flnb	chr14	7873399	A	G	+	1326	2	0.00150602	0	0	0	0	0	0	0	0	0	7873345	7873492	exon
Flnb	chr14	7873403	A	G	+	1440	1	0.000693963	0	0	0	0	0	0	0	0	0	7873345	7873492	exon
Flnb	chr14	7873412	A	G	+	1505	1	0.000664011	1889	1	0.000529101	0	0	0	0	0	0	7873345	7873492	exon
Flnb	chr14	7873426	A	G	+	0	0	0	0	0	0	0	0	0	2160	1	0.000462749	7873345	7873492	exon
Flnb	chr14	7873427	A	G	+	0	0	0	1923	1	0.000519751	0	0	0	0	0	0	7873345	7873492	exon
Flnb	chr14	7873433	A	G	+	0	0	0	0	0	0	0	0	0	2154	1	0.000464037	7873345	7873492	exon
Flnb	chr14	7873437	A	G	+	0	0	0	1929	1	0.000518135	0	0	0	2125	3	0.00140977	7873345	7873492	exon
Flnb	chr14	7873463	A	G	+	0	0	0	0	0	0	1369	1	0.000729927	0	0	0	7873345	7873492	exon
Flnb	chr14	7873469	A	G	+	0	0	0	0	0	0	0	0	0	1871	1	0.000534188	7873345	7873492	exon
Flnb	chr14	7873479	A	G	+	0	0	0	0	0	0	0	0	0	2070	1	0.000482859	7873345	7873492	exon
Flnb	chr14	7873489	A	G	+	0	0	0	0	0	0	1449	2	0.00137836	0	0	0	7873345	7873492	exon
Flnb	chr14	7873600	A	G	+	0	0	0	0	0	0	0	0	0	20	1	0.047619	7873492	7881583	intron
Flnb	chr14	7873778	A	G	+	25	2	0.0740741	0	0	0	0	0	0	0	0	0	7873492	7881583	intron
Flnb	chr14	7873930	A	G	+	0	0	0	0	0	0	9	1	0.1	0	0	0	7873492	7881583	intron
Flnb	chr14	7873932	A	G	+	0	0	0	0	0	0	10	1	0.0909091	0	0	0	7873492	7881583	intron
Flnb	chr14	7873935	A	G	+	0	0	0	0	0	0	8	1	0.111111	0	0	0	7873492	7881583	intron
Flnb	chr14	7874178	A	G	+	0	0	0	0	0	0	0	0	0	34	1	0.0285714	7873492	7881583	intron
Flnb	chr14	7874864	A	G	+	33	1	0.0294118	0	0	0	0	0	0	0	0	0	7873492	7881583	intron
Flnb	chr14	7874957	A	G	+	22	1	0.0434783	0	0	0	0	0	0	0	0	0	7873492	7881583	intron
Flnb	chr14	7875429	A	G	+	0	28	1	0	14	1	0	15	1	0	30	1	7873492	7881583	intron
Flnb	chr14	7875464	A	G	+	0	0	0	0	0	0	0	0	0	36	1	0.027027	7873492	7881583	intron
Flnb	chr14	7875658	A	G	+	0	17	1	0	7	1	0	15	1	0	21	1	7873492	7881583	intron
Flnb	chr14	7875853	A	G	+	38	1	0.025641	0	0	0	0	0	0	0	0	0	7873492	7881583	intron
Flnb	chr14	7876219	A	G	+	0	10	1	0	5	1	0	12	1	0	14	1	7873492	7881583	intron
Flnb	chr14	7876344	A	G	+	38	1	0.025641	0	0	0	0	0	0	0	0	0	7873492	7881583	intron
Flnb	chr14	7876406	A	G	+	0	0	0	0	0	0	21	1	0.0454545	0	0	0	7873492	7881583	intron
Flnb	chr14	7876568	A	G	+	0	33	1	0	18	1	0	24	1	0	31	1	7873492	7881583	intron
Flnb	chr14	7876695	A	G	+	0	0	0	22	1	0.0434783	0	0	0	0	0	0	7873492	7881583	intron
Flnb	chr14	7876952	A	G	+	0	0	0	0	0	0	24	1	0.04	0	0	0	7873492	7881583	intron
Flnb	chr14	7877005	A	G	+	0	0	0	16	1	0.0588235	0	0	0	0	0	0	7873492	7881583	intron
Flnb	chr14	7877024	A	G	+	0	30	1	0	12	1	0	23	1	0	31	1	7873492	7881583	intron
Flnb	chr14	7877803	A	G	+	0	0	0	0	0	0	27	1	0.0357143	0	0	0	7873492	7881583	intron
Flnb	chr14	7877947	A	G	+	0	33	1	0	11	1	0	11	1	0	26	1	7873492	7881583	intron
Flnb	chr14	7878056	A	G	+	0	28	1	0	12	1	0	11	1	0	22	1	7873492	7881583	intron
Flnb	chr14	7878293	A	G	+	0	0	0	0	0	0	0	0	0	19	2	0.0952381	7873492	7881583	intron
Flnb	chr14	7878366	A	G	+	0	0	0	0	0	0	36	1	0.027027	0	0	0	7873492	7881583	intron
Flnb	chr14	7878428	A	G	+	0	31	1	0	15	1	0	34	1	0	30	1	7873492	7881583	intron
Flnb	chr14	7879021	A	G	+	0	0	0	8	1	0.111111	0	0	0	0	0	0	7873492	7881583	intron
Flnb	chr14	7879473	A	G	+	0	0	0	0	0	0	0	0	0	37	1	0.0263158	7873492	7881583	intron
Flnb	chr14	7879918	A	G	+	0	0	0	0	0	0	19	1	0.05	0	0	0	7873492	7881583	intron
Flnb	chr14	7880153	A	G	+	0	0	0	0	0	0	0	0	0	40	1	0.0243902	7873492	7881583	intron
Flnb	chr14	7880769	A	G	+	0	0	0	0	0	0	0	0	0	27	1	0.0357143	7873492	7881583	intron
Flnb	chr14	7881594	A	G	+	0	0	0	0	0	0	1455	1	0.000686813	0	0	0	7881583	7881701	exon
Flnb	chr14	7881600	A	G	+	0	0	0	1849	1	0.000540541	0	0	0	0	0	0	7881583	7881701	exon
Flnb	chr14	7881601	A	G	+	0	0	0	1863	1	0.000536481	0	0	0	0	0	0	7881583	7881701	exon
Flnb	chr14	7881613	A	G	+	0	0	0	0	0	0	0	0	0	2361	1	0.00042337	7881583	7881701	exon
Flnb	chr14	7881642	A	G	+	0	0	0	2144	1	0.0004662	0	0	0	0	0	0	7881583	7881701	exon
Flnb	chr14	7881652	A	G	+	0	0	0	0	0	0	0	0	0	2460	3	0.00121803	7881583	7881701	exon
Flnb	chr14	7881683	A	G	+	1625	2	0.00122926	0	0	0	0	0	0	0	0	0	7881583	7881701	exon
Flnb	chr14	7881685	A	G	+	0	0	0	1987	1	0.000503018	1421	1	0.000703235	0	0	0	7881583	7881701	exon
Flnb	chr14	7881686	A	G	+	0	0	0	0	0	0	0	0	0	2202	1	0.000453926	7881583	7881701	exon
Flnb	chr14	7881689	A	G	+	0	0	0	1958	1	0.000510465	0	0	0	0	0	0	7881583	7881701	exon
Flnb	chr14	7881690	A	G	+	0	0	0	1915	1	0.000521921	0	0	0	0	0	0	7881583	7881701	exon
Flnb	chr14	7881693	A	G	+	0	0	0	0	0	0	0	0	0	2088	1	0.000478698	7881583	7881701	exon
Flnb	chr14	7881698	A	G	+	1471	1	0.000679348	0	0	0	0	0	0	0	0	0	7881583	7881701	exon
Flnb	chr14	7881700	A	G	+	1488	1	0.000671592	0	0	0	0	0	0	2048	1	0.000488043	7881583	7881701	exon
Flnb	chr14	7881897	A	G	+	0	0	0	0	0	0	0	0	0	13	1	0.0714286	7881701	7882207	intron
Flnb	chr14	7882221	A	G	+	0	0	0	0	0	0	0	0	0	2059	1	0.000485437	7882207	7882284	exon
Flnb	chr14	7882223	A	G	+	0	0	0	0	0	0	1251	2	0.00159617	0	0	0	7882207	7882284	exon
Flnb	chr14	7882229	A	G	+	0	0	0	2040	2	0.000979432	0	0	0	0	0	0	7882207	7882284	exon
Flnb	chr14	7882232	A	G	+	0	0	0	2012	1	0.000496771	0	0	0	0	0	0	7882207	7882284	exon
Flnb	chr14	7882238	A	G	+	1575	1	0.000634518	0	0	0	0	0	0	0	0	0	7882207	7882284	exon
Flnb	chr14	7882244	A	G	+	0	0	0	0	0	0	0	0	0	2300	2	0.00086881	7882207	7882284	exon
Flnb	chr14	7882265	A	G	+	1819	2	0.0010983	0	0	0	0	0	0	0	0	0	7882207	7882284	exon
Flnb	chr14	7882270	A	G	+	0	0	0	2281	1	0.000438212	0	0	0	2673	1	0.000373972	7882207	7882284	exon
Flnb	chr14	7882280	A	G	+	1582	2	0.00126263	2023	1	0.000494071	0	0	0	0	0	0	7882207	7882284	exon
Flnb	chr14	7882292	A	G	+	0	0	0	0	0	0	0	0	0	18	1	0.0526316	7882284	7883760	intron
Flnb	chr14	7882698	A	G	+	0	0	0	0	0	0	11	1	0.0833333	0	0	0	7882284	7883760	intron
Flnb	chr14	7882779	A	G	+	0	0	0	0	0	0	0	0	0	16	1	0.0588235	7882284	7883760	intron
Flnb	chr14	7883344	A	G	+	0	7	1	0	3	1	0	3	1	0	1	1	7882284	7883760	intron
Flnb	chr14	7883355	A	G	+	0	0	0	0	0	0	0	1	1	0	0	0	7882284	7883760	intron
Flnb	chr14	7883398	A	G	+	0	0	0	0	0	0	0	0	0	30	1	0.0322581	7882284	7883760	intron
Flnb	chr14	7883780	A	G	+	0	0	0	2246	1	0.000445038	0	0	0	2687	1	0.000372024	7883760	7883922	exon
Flnb	chr14	7883782	A	G	+	0	0	0	2232	1	0.000447828	1356	1	0.00073692	0	0	0	7883760	7883922	exon
Flnb	chr14	7883793	A	G	+	1843	1	0.000542299	0	0	0	1458	1	0.000685401	0	0	0	7883760	7883922	exon
Flnb	chr14	7883807	A	G	+	0	0	0	0	0	0	0	0	0	2333	1	0.000428449	7883760	7883922	exon
Flnb	chr14	7883811	A	G	+	0	0	0	0	0	0	1293	1	0.000772798	0	0	0	7883760	7883922	exon
Flnb	chr14	7883818	A	G	+	0	0	0	1933	2	0.00103359	0	0	0	0	0	0	7883760	7883922	exon
Flnb	chr14	7883822	A	G	+	0	0	0	1918	1	0.000521105	0	0	0	0	0	0	7883760	7883922	exon
Flnb	chr14	7883831	A	G	+	0	0	0	1746	1	0.00057241	0	0	0	0	0	0	7883760	7883922	exon
Flnb	chr14	7883843	A	G	+	0	0	0	0	0	0	0	0	0	2276	1	0.000439174	7883760	7883922	exon
Flnb	chr14	7883853	A	G	+	1617	1	0.000618047	0	0	0	0	0	0	0	0	0	7883760	7883922	exon
Flnb	chr14	7883869	A	G	+	0	0	0	0	0	0	1394	1	0.000716846	0	0	0	7883760	7883922	exon
Flnb	chr14	7883870	A	G	+	0	0	0	2067	1	0.000483559	0	0	0	0	0	0	7883760	7883922	exon
Flnb	chr14	7883880	A	G	+	0	0	0	0	0	0	0	0	0	2261	2	0.000883783	7883760	7883922	exon
Flnb	chr14	7883890	A	G	+	0	0	0	1813	1	0.000551268	0	0	0	0	0	0	7883760	7883922	exon
Flnb	chr14	7883898	A	G	+	0	0	0	0	0	0	0	0	0	1776	2	0.00112486	7883760	7883922	exon
Flnb	chr14	7883916	A	G	+	0	0	0	0	0	0	1249	1	0.0008	0	0	0	7883760	7883922	exon
Flnb	chr14	7883918	A	G	+	0	0	0	1822	1	0.000548546	0	0	0	0	0	0	7883760	7883922	exon
Flnb	chr14	7884567	A	G	+	1324	1	0.000754717	0	0	0	0	0	0	0	0	0	7884550	7884747	exon
Flnb	chr14	7884577	A	G	+	1355	1	0.000737463	0	0	0	0	0	0	0	0	0	7884550	7884747	exon
Flnb	chr14	7884586	A	G	+	0	0	0	0	0	0	1134	1	0.000881057	0	0	0	7884550	7884747	exon
Flnb	chr14	7884597	A	G	+	0	0	0	0	0	0	0	0	0	1787	2	0.00111794	7884550	7884747	exon
Flnb	chr14	7884603	A	G	+	1267	1	0.000788644	0	0	0	0	0	0	0	0	0	7884550	7884747	exon
Flnb	chr14	7884610	A	G	+	0	0	0	1540	1	0.000648929	0	0	0	0	0	0	7884550	7884747	exon
Flnb	chr14	7884623	A	G	+	0	0	0	1469	1	0.000680272	0	0	0	0	0	0	7884550	7884747	exon
Flnb	chr14	7884625	A	G	+	1242	1	0.000804505	0	0	0	0	0	0	0	0	0	7884550	7884747	exon
Flnb	chr14	7884633	A	G	+	1098	1	0.000909918	0	0	0	0	0	0	1524	1	0.000655738	7884550	7884747	exon
Flnb	chr14	7884657	A	G	+	0	0	0	1084	1	0.000921659	0	0	0	0	0	0	7884550	7884747	exon
Flnb	chr14	7884662	A	G	+	0	0	0	0	0	0	0	0	0	1280	1	0.00078064	7884550	7884747	exon
Flnb	chr14	7884711	A	G	+	1105	1	0.000904159	1248	1	0.000800641	0	0	0	0	0	0	7884550	7884747	exon
Flnb	chr14	7884737	A	G	+	0	0	0	0	0	0	0	0	0	1814	2	0.00110132	7884550	7884747	exon
Flnb	chr14	7884738	A	G	+	1306	1	0.000765111	0	0	0	0	0	0	0	0	0	7884550	7884747	exon
Flnb	chr14	7884953	A	G	+	0	0	0	0	0	0	0	0	0	26	1	0.037037	7884747	7887537	intron
Flnb	chr14	7885156	A	G	+	47	1	0.0208333	0	0	0	0	0	0	0	0	0	7884747	7887537	intron
Flnb	chr14	7885306	A	G	+	0	33	1	0	20	1	0	32	1	0	41	1	7884747	7887537	intron
Flnb	chr14	7885537	A	G	+	0	0	0	0	0	0	42	1	0.0232558	0	0	0	7884747	7887537	intron
Flnb	chr14	7885833	A	G	+	41	3	0.0681818	0	0	0	0	0	0	0	0	0	7884747	7887537	intron
Flnb	chr14	7886236	A	G	+	53	2	0.0363636	0	0	0	0	0	0	0	0	0	7884747	7887537	intron
Flnb	chr14	7886462	A	G	+	0	0	0	0	0	0	0	0	0	35	1	0.0277778	7884747	7887537	intron
Flnb	chr14	7887283	A	G	+	22	1	0.0434783	0	0	0	0	0	0	0	0	0	7884747	7887537	intron
Flnb	chr14	7887286	A	G	+	0	0	0	0	0	0	22	1	0.0434783	0	0	0	7884747	7887537	intron
Flnb	chr14	7887547	A	G	+	1334	1	0.000749064	0	0	0	0	0	0	0	0	0	7887537	7887674	exon
Flnb	chr14	7887548	A	G	+	1313	1	0.000761035	0	0	0	0	0	0	0	0	0	7887537	7887674	exon
Flnb	chr14	7887549	A	G	+	0	0	0	0	0	0	0	0	0	1694	1	0.000589971	7887537	7887674	exon
Flnb	chr14	7887557	A	G	+	1329	1	0.00075188	0	0	0	0	0	0	0	0	0	7887537	7887674	exon
Flnb	chr14	7887571	A	G	+	1200	1	0.000832639	1306	1	0.000765111	0	0	0	0	0	0	7887537	7887674	exon
Flnb	chr14	7887579	A	G	+	1163	1	0.000859107	1251	1	0.000798722	0	0	0	0	0	0	7887537	7887674	exon
Flnb	chr14	7887596	A	G	+	0	0	0	1399	2	0.00142755	0	0	0	0	0	0	7887537	7887674	exon
Flnb	chr14	7887629	A	G	+	1307	1	0.000764526	0	0	0	0	0	0	0	0	0	7887537	7887674	exon
Flnb	chr14	7887630	A	G	+	1278	3	0.00234192	0	0	0	0	0	0	1768	1	0.000565291	7887537	7887674	exon
Flnb	chr14	7887640	A	G	+	0	0	0	0	0	0	0	0	0	1754	1	0.000569801	7887537	7887674	exon
Flnb	chr14	7887658	A	G	+	0	0	0	1552	1	0.000643915	0	0	0	0	0	0	7887537	7887674	exon
Flnb	chr14	7887666	A	G	+	1379	1	0.000724638	0	0	0	0	0	0	2030	1	0.000492368	7887537	7887674	exon
Flnb	chr14	7887941	A	G	+	0	28	1	0	29	1	0	31	1	0	39	1	7887674	7889135	intron
Flnb	chr14	7888584	A	G	+	0	0	0	15	1	0.0625	0	0	0	0	0	0	7887674	7889135	intron
Flnb	chr14	7888956	A	G	+	0	24	1	0	14	1	0	15	1	0	23	1	7887674	7889135	intron
Flnb	chr14	7889144	A	G	+	1495	1	0.000668449	0	0	0	0	0	0	0	0	0	7889135	7889261	exon
Flnb	chr14	7889147	A	G	+	1573	2	0.00126984	0	0	0	1409	1	0.00070922	0	0	0	7889135	7889261	exon
Flnb	chr14	7889160	A	G	+	0	0	0	0	0	0	0	0	0	2097	1	0.000476644	7889135	7889261	exon
Flnb	chr14	7889161	A	G	+	1332	2	0.00149925	1669	4	0.00239091	0	0	0	2005	7	0.00347913	7889135	7889261	exon
Flnb	chr14	7889162	A	G	+	1355	1	0.000737463	1698	2	0.00117647	0	0	0	2026	2	0.000986193	7889135	7889261	exon
Flnb	chr14	7889192	A	G	+	0	0	0	1324	1	0.000754717	0	0	0	0	0	0	7889135	7889261	exon
Flnb	chr14	7889195	A	G	+	0	0	0	1364	1	0.000732601	0	0	0	0	0	0	7889135	7889261	exon
Flnb	chr14	7889206	A	G	+	0	0	0	0	0	0	952	1	0.00104932	0	0	0	7889135	7889261	exon
Flnb	chr14	7889211	A	G	+	0	0	0	0	0	0	944	2	0.00211416	1634	1	0.000611621	7889135	7889261	exon
Flnb	chr14	7889215	A	G	+	0	0	0	0	0	0	0	0	0	1594	1	0.000626959	7889135	7889261	exon
Flnb	chr14	7889217	A	G	+	0	0	0	1304	1	0.000766284	0	0	0	0	0	0	7889135	7889261	exon
Flnb	chr14	7889229	A	G	+	0	0	0	0	0	0	0	0	0	1313	1	0.000761035	7889135	7889261	exon
Flnb	chr14	7889233	A	G	+	0	0	0	0	0	0	834	1	0.0011976	0	0	0	7889135	7889261	exon
Flnb	chr14	7889246	A	G	+	688	1	0.00145138	0	0	0	0	0	0	0	0	0	7889135	7889261	exon
Flnb	chr14	7889249	A	G	+	0	0	0	0	0	0	795	1	0.00125628	0	0	0	7889135	7889261	exon
Flnb	chr14	7889265	A	G	+	0	0	0	17	2	0.105263	0	0	0	0	0	0	7889261	7890730	intron
Flnb	chr14	7889528	A	G	+	0	0	0	0	0	0	0	0	0	25	1	0.0384615	7889261	7890730	intron
Flnb	chr14	7889648	A	G	+	26	1	0.037037	0	0	0	0	0	0	0	0	0	7889261	7890730	intron
Flnb	chr14	7889869	A	G	+	0	0	0	0	0	0	0	0	0	45	1	0.0217391	7889261	7890730	intron
Flnb	chr14	7889875	A	G	+	0	0	0	0	0	0	17	1	0.0555556	0	0	0	7889261	7890730	intron
Flnb	chr14	7889953	A	G	+	0	23	1	0	14	1	0	14	1	0	21	1	7889261	7890730	intron
Flnb	chr14	7890760	A	G	+	979	1	0.00102041	0	0	0	0	0	0	1554	1	0.000643087	7890730	7890866	exon
Flnb	chr14	7890798	A	G	+	1140	1	0.000876424	0	0	0	0	0	0	0	0	0	7890730	7890866	exon
Flnb	chr14	7890820	A	G	+	0	0	0	0	0	0	0	0	0	1532	2	0.00130378	7890730	7890866	exon
Flnb	chr14	7890837	A	G	+	932	1	0.00107181	0	0	0	0	0	0	0	0	0	7890730	7890866	exon
Flnb	chr14	7892055	A	G	+	0	0	0	0	0	0	0	0	0	27	1	0.0357143	7890866	7892080	intron
Flnb	chr14	7892105	A	G	+	0	0	0	1286	1	0.000777001	0	0	0	0	0	0	7892080	7892273	exon
Flnb	chr14	7892108	A	G	+	0	0	0	0	0	0	922	1	0.00108342	0	0	0	7892080	7892273	exon
Flnb	chr14	7892109	A	G	+	1011	1	0.000988142	0	0	0	0	0	0	0	0	0	7892080	7892273	exon
Flnb	chr14	7892116	A	G	+	0	0	0	0	0	0	958	1	0.00104275	0	0	0	7892080	7892273	exon
Flnb	chr14	7892128	A	G	+	0	0	0	0	0	0	0	0	0	1740	1	0.000574383	7892080	7892273	exon
Flnb	chr14	7892131	A	G	+	0	0	0	1356	1	0.00073692	0	0	0	0	0	0	7892080	7892273	exon
Flnb	chr14	7892152	A	G	+	0	0	0	1394	1	0.000716846	0	0	0	0	0	0	7892080	7892273	exon
Flnb	chr14	7892163	A	G	+	0	0	0	1418	1	0.000704722	0	0	0	1707	1	0.00058548	7892080	7892273	exon
Flnb	chr14	7892190	A	G	+	0	0	0	0	0	0	0	0	0	1769	1	0.000564972	7892080	7892273	exon
Flnb	chr14	7892203	A	G	+	0	0	0	0	0	0	1017	1	0.000982318	0	0	0	7892080	7892273	exon
Flnb	chr14	7892214	A	G	+	1103	1	0.000905797	0	0	0	0	0	0	0	0	0	7892080	7892273	exon
Flnb	chr14	7892229	A	G	+	0	0	0	0	0	0	0	0	0	1888	2	0.0010582	7892080	7892273	exon
Flnb	chr14	7892250	A	G	+	0	0	0	0	0	0	0	0	0	1721	2	0.00116077	7892080	7892273	exon
Flnb	chr14	7892252	A	G	+	0	0	0	1569	1	0.000636943	0	0	0	1707	2	0.00117028	7892080	7892273	exon
Flnb	chr14	7892255	A	G	+	0	0	0	0	0	0	1064	2	0.00187617	0	0	0	7892080	7892273	exon
Flnb	chr14	7892262	A	G	+	0	0	0	0	0	0	0	0	0	1748	1	0.000571755	7892080	7892273	exon
Flnb	chr14	7892584	A	G	+	0	17	1	0	12	1	0	11	1	0	13	1	7892273	7892873	intron
Flnb	chr14	7892610	A	G	+	0	22	1	0	14	1	0	13	1	0	18	1	7892273	7892873	intron
Flnb	chr14	7892901	A	G	+	0	0	0	1661	2	0.00120265	0	0	0	0	0	0	7892873	7892986	exon
Flnb	chr14	7892926	A	G	+	1130	1	0.000884173	1465	1	0.000682128	0	0	0	0	0	0	7892873	7892986	exon
Flnb	chr14	7892943	A	G	+	1257	1	0.000794913	0	0	0	0	0	0	0	0	0	7892873	7892986	exon
Flnb	chr14	7892948	A	G	+	1197	1	0.000834725	0	0	0	0	0	0	0	0	0	7892873	7892986	exon
Flnb	chr14	7892960	A	G	+	0	0	0	0	0	0	0	0	0	1678	2	0.00119048	7892873	7892986	exon
Flnb	chr14	7892972	A	G	+	1220	1	0.000819001	0	0	0	0	0	0	0	0	0	7892873	7892986	exon
Flnb	chr14	7892977	A	G	+	1244	1	0.000803213	0	0	0	0	0	0	0	0	0	7892873	7892986	exon
Flnb	chr14	7893027	A	G	+	0	17	1	0	7	1	0	12	1	0	15	1	7892986	7893744	intron
Flnb	chr14	7893144	A	G	+	0	21	1	0	6	1	0	15	1	0	0	0	7892986	7893744	intron
Flnb	chr14	7893250	A	G	+	16	1	0.0588235	0	0	0	0	0	0	0	0	0	7892986	7893744	intron
Flnb	chr14	7893745	A	G	+	1232	1	0.00081103	0	0	0	0	0	0	0	0	0	7893744	7893887	exon
Flnb	chr14	7893751	A	G	+	0	0	0	0	0	0	0	0	0	1490	1	0.000670691	7893744	7893887	exon
Flnb	chr14	7893757	A	G	+	1196	1	0.000835422	0	0	0	0	0	0	0	0	0	7893744	7893887	exon
Flnb	chr14	7893777	A	G	+	0	0	0	0	0	0	0	0	0	1402	1	0.000712758	7893744	7893887	exon
Flnb	chr14	7893786	A	G	+	0	0	0	0	0	0	0	0	0	1523	1	0.000656168	7893744	7893887	exon
Flnb	chr14	7893790	A	G	+	0	0	0	1378	1	0.000725163	0	0	0	0	0	0	7893744	7893887	exon
Flnb	chr14	7893809	A	G	+	914	1	0.0010929	0	0	0	0	0	0	0	0	0	7893744	7893887	exon
Flnb	chr14	7893864	A	G	+	0	0	0	1167	2	0.00171086	0	0	0	0	0	0	7893744	7893887	exon
Flnb	chr14	7893883	A	G	+	0	0	0	0	0	0	0	0	0	1241	2	0.00160901	7893744	7893887	exon
Flnb	chr14	7894138	A	G	+	0	0	0	1129	1	0.000884956	0	0	0	0	0	0	7894134	7894257	exon
Flnb	chr14	7894152	A	G	+	0	0	0	0	0	0	0	0	0	1456	1	0.000686342	7894134	7894257	exon
Flnb	chr14	7894156	A	G	+	0	0	0	1496	1	0.000668003	0	0	0	0	0	0	7894134	7894257	exon
Flnb	chr14	7894172	A	G	+	0	0	0	0	0	0	0	0	0	1470	1	0.00067981	7894134	7894257	exon
Flnb	chr14	7894194	A	G	+	1186	1	0.00084246	1582	3	0.00189274	0	0	0	0	0	0	7894134	7894257	exon
Flnb	chr14	7894232	A	G	+	0	0	0	0	0	0	0	0	0	1946	1	0.000513611	7894134	7894257	exon
Flnb	chr14	7894237	A	G	+	1260	1	0.000793021	0	0	0	0	0	0	0	0	0	7894134	7894257	exon
Flnb	chr14	7894255	A	G	+	1231	1	0.000811688	0	0	0	0	0	0	0	0	0	7894134	7894257	exon
Flnb	chr14	7894374	A	G	+	0	0	0	0	0	0	25	1	0.0384615	0	0	0	7894257	7894527	intron
Flnb	chr14	7894530	A	G	+	0	0	0	1759	3	0.00170261	0	0	0	0	0	0	7894527	7894687	exon
Flnb	chr14	7894535	A	G	+	1365	1	0.000732064	0	0	0	0	0	0	2068	1	0.000483325	7894527	7894687	exon
Flnb	chr14	7894544	A	G	+	0	0	0	0	0	0	1278	1	0.000781861	0	0	0	7894527	7894687	exon
Flnb	chr14	7894547	A	G	+	0	0	0	0	0	0	0	0	0	2171	1	0.000460405	7894527	7894687	exon
Flnb	chr14	7894548	A	G	+	0	0	0	0	0	0	0	0	0	2216	1	0.00045106	7894527	7894687	exon
Flnb	chr14	7894578	A	G	+	0	0	0	1587	1	0.000629723	0	0	0	0	0	0	7894527	7894687	exon
Flnb	chr14	7894581	A	G	+	0	0	0	0	0	0	1130	1	0.000884173	0	0	0	7894527	7894687	exon
Flnb	chr14	7894596	A	G	+	0	0	0	1725	1	0.000579374	0	0	0	0	0	0	7894527	7894687	exon
Flnb	chr14	7894607	A	G	+	0	0	0	0	0	0	1480	1	0.000675219	0	0	0	7894527	7894687	exon
Flnb	chr14	7894639	A	G	+	0	0	0	2063	2	0.000968523	0	0	0	0	0	0	7894527	7894687	exon
Flnb	chr14	7894669	A	G	+	0	0	0	0	0	0	0	0	0	2449	1	0.000408163	7894527	7894687	exon
Flnb	chr14	7895040	A	G	+	0	0	0	0	0	0	0	0	0	34	1	0.0285714	7894687	7896090	intron
Flnb	chr14	7895407	A	G	+	16	1	0.0588235	0	0	0	0	0	0	0	0	0	7894687	7896090	intron
Flnb	chr14	7895420	A	G	+	0	0	0	0	0	0	17	1	0.0555556	0	0	0	7894687	7896090	intron
Flnb	chr14	7895978	A	G	+	0	0	0	0	0	0	0	0	0	27	1	0.0357143	7894687	7896090	intron
Flnb	chr14	7896102	A	G	+	1622	4	0.00246002	1877	2	0.0010644	1377	2	0.00145033	2122	2	0.00094162	7896090	7896180	exon
Flnb	chr14	7896113	A	G	+	0	0	0	1762	1	0.000567215	0	0	0	0	0	0	7896090	7896180	exon
Flnb	chr14	7896119	A	G	+	0	0	0	0	0	0	0	0	0	1977	1	0.000505561	7896090	7896180	exon
Flnb	chr14	7896124	A	G	+	0	0	0	1794	1	0.000557103	0	0	0	0	0	0	7896090	7896180	exon
Flnb	chr14	7896133	A	G	+	1440	1	0.000693963	0	0	0	0	0	0	0	0	0	7896090	7896180	exon
Flnb	chr14	7896136	A	G	+	0	0	0	0	0	0	0	0	0	1889	1	0.000529101	7896090	7896180	exon
Flnb	chr14	7896141	A	G	+	1343	1	0.000744048	0	0	0	0	0	0	0	0	0	7896090	7896180	exon
Flnb	chr14	7896144	A	G	+	1262	1	0.000791766	0	0	0	0	0	0	0	0	0	7896090	7896180	exon
Flnb	chr14	7896150	A	G	+	0	0	0	1534	1	0.000651466	0	0	0	0	0	0	7896090	7896180	exon
Flnb	chr14	7896151	A	G	+	0	0	0	0	0	0	1070	2	0.00186567	0	0	0	7896090	7896180	exon
Flnb	chr14	7896155	A	G	+	1319	1	0.000757576	1614	1	0.000619195	0	0	0	0	0	0	7896090	7896180	exon
Flnb	chr14	7896179	A	G	+	1399	1	0.000714286	0	0	0	1205	1	0.000829187	2009	3	0.00149105	7896090	7896180	exon
Flnb	chr14	7896393	A	G	+	0	0	0	0	0	0	0	0	0	1898	1	0.000526593	7896386	7896555	exon
Flnb	chr14	7896400	A	G	+	0	0	0	1711	1	0.000584112	0	0	0	0	0	0	7896386	7896555	exon
Flnb	chr14	7896401	A	G	+	0	0	0	0	0	0	1151	2	0.00173461	0	0	0	7896386	7896555	exon
Flnb	chr14	7896405	A	G	+	0	0	0	0	0	0	0	0	0	1976	1	0.000505817	7896386	7896555	exon
Flnb	chr14	7896441	A	G	+	0	0	0	0	0	0	1099	1	0.000909091	0	0	0	7896386	7896555	exon
Flnb	chr14	7896463	A	G	+	1386	2	0.00144092	1837	1	0.00054407	0	0	0	0	0	0	7896386	7896555	exon
Flnb	chr14	7896466	A	G	+	0	0	0	1833	1	0.000545256	0	0	0	0	0	0	7896386	7896555	exon
Flnb	chr14	7896486	A	G	+	0	0	0	1664	1	0.000600601	0	0	0	0	0	0	7896386	7896555	exon
Flnb	chr14	7896529	A	G	+	1100	1	0.000908265	0	0	0	0	0	0	0	0	0	7896386	7896555	exon
Flnb	chr14	7896535	A	G	+	0	0	0	1632	1	0.00061237	0	0	0	0	0	0	7896386	7896555	exon
Flnb	chr14	7896536	A	G	+	0	0	0	1602	2	0.00124688	0	0	0	0	0	0	7896386	7896555	exon
Flnb	chr14	7896541	A	G	+	1026	2	0.00194553	1495	1	0.000668449	0	0	0	0	0	0	7896386	7896555	exon
Flnb	chr14	7896551	A	G	+	0	0	0	1510	1	0.000661813	0	0	0	1708	1	0.000585138	7896386	7896555	exon
Flnb	chr14	7896554	A	G	+	997	1	0.001002	0	0	0	894	1	0.00111732	1624	1	0.000615385	7896386	7896555	exon
Flnb	chr14	7897227	A	G	+	0	0	0	9	1	0.1	0	0	0	0	0	0	7896555	7901884	intron
Flnb	chr14	7897287	A	G	+	20	1	0.047619	0	0	0	0	0	0	0	0	0	7896555	7901884	intron
Flnb	chr14	7897289	A	G	+	20	1	0.047619	0	0	0	0	0	0	0	0	0	7896555	7901884	intron
Flnb	chr14	7897663	A	G	+	0	29	1	0	18	1	0	31	1	0	37	1	7896555	7901884	intron
Flnb	chr14	7897803	A	G	+	0	1	1	0	1	1	0	0	0	0	2	1	7896555	7901884	intron
Flnb	chr14	7897851	A	G	+	0	0	0	0	0	0	0	2	1	0	2	1	7896555	7901884	intron
Flnb	chr14	7897883	A	G	+	0	3	1	0	2	1	2	1	0.333333	2	5	0.714286	7896555	7901884	intron
Flnb	chr14	7898433	A	G	+	0	23	1	0	17	1	0	20	1	0	33	1	7896555	7901884	intron
Flnb	chr14	7898513	A	G	+	28	1	0.0344828	0	0	0	0	0	0	0	0	0	7896555	7901884	intron
Flnb	chr14	7898785	A	G	+	0	0	0	0	0	0	0	0	0	26	1	0.037037	7896555	7901884	intron
Flnb	chr14	7898855	A	G	+	0	33	1	0	14	1	0	22	1	0	20	1	7896555	7901884	intron
Flnb	chr14	7898923	A	G	+	0	0	0	0	0	0	0	0	0	23	1	0.0416667	7896555	7901884	intron
Flnb	chr14	7898933	A	G	+	28	1	0.0344828	0	0	0	0	0	0	0	0	0	7896555	7901884	intron
Flnb	chr14	7899861	A	G	+	0	0	0	0	0	0	0	0	0	12	1	0.0769231	7896555	7901884	intron
Flnb	chr14	7900349	A	G	+	0	0	0	0	0	0	0	0	0	22	1	0.0434783	7896555	7901884	intron
Flnb	chr14	7900470	A	G	+	31	1	0.03125	0	0	0	0	0	0	0	0	0	7896555	7901884	intron
Flnb	chr14	7901894	A	G	+	0	0	0	0	0	0	0	0	0	2017	1	0.00049554	7901884	7902001	exon
Flnb	chr14	7901929	A	G	+	1316	1	0.000759301	0	0	0	0	0	0	0	0	0	7901884	7902001	exon
Flnb	chr14	7901931	A	G	+	0	0	0	1739	1	0.000574713	0	0	0	0	0	0	7901884	7902001	exon
Flnb	chr14	7901966	A	G	+	1928	1	0.000518403	0	0	0	0	0	0	0	0	0	7901884	7902001	exon
Flnb	chr14	7901977	A	G	+	0	0	0	0	0	0	0	0	0	3004	1	0.000332779	7901884	7902001	exon
Flnb	chr14	7901986	A	G	+	0	0	0	0	0	0	0	0	0	2749	1	0.000363636	7901884	7902001	exon
Flnb	chr14	7901987	A	G	+	0	0	0	2119	1	0.000471698	0	0	0	0	0	0	7901884	7902001	exon
Flnb	chr14	7901991	A	G	+	1619	2	0.00123381	2020	1	0.000494805	0	0	0	0	0	0	7901884	7902001	exon
Flnb	chr14	7901996	A	G	+	1577	2	0.00126662	0	0	0	0	0	0	0	0	0	7901884	7902001	exon
Flnb	chr14	7901998	A	G	+	0	0	0	0	0	0	0	0	0	2333	1	0.000428449	7901884	7902001	exon
Flnb	chr14	7902947	A	G	+	0	0	0	11	1	0.0833333	0	0	0	0	0	0	7902001	7904462	intron
Flnb	chr14	7903636	A	G	+	0	21	1	0	9	1	1	14	0.933333	1	9	0.9	7902001	7904462	intron
Flnb	chr14	7903686	A	G	+	0	0	0	13	1	0.0714286	0	0	0	0	0	0	7902001	7904462	intron
Flnb	chr14	7904263	A	G	+	21	1	0.0454545	0	0	0	0	0	0	0	0	0	7902001	7904462	intron
Flnb	chr14	7904284	A	G	+	0	31	1	0	14	1	0	13	1	0	14	1	7902001	7904462	intron
Flnb	chr14	7904296	A	G	+	0	34	1	0	15	1	0	19	1	0	27	1	7902001	7904462	intron
Flnb	chr14	7904475	A	G	+	0	0	0	0	0	0	1129	1	0.000884956	0	0	0	7904462	7904724	exon
Flnb	chr14	7904483	A	G	+	1423	1	0.000702247	1738	1	0.000575043	0	0	0	2259	2	0.000884564	7904462	7904724	exon
Flnb	chr14	7904511	A	G	+	1117	2	0.00178731	0	0	0	890	1	0.00112233	0	0	0	7904462	7904724	exon
Flnb	chr14	7904514	A	G	+	1124	1	0.000888889	1430	1	0.000698812	0	0	0	0	0	0	7904462	7904724	exon
Flnb	chr14	7904519	A	G	+	1092	7	0.00636943	0	0	0	921	2	0.00216685	0	0	0	7904462	7904724	exon
Flnb	chr14	7904524	A	G	+	992	1	0.00100705	0	0	0	0	0	0	0	0	0	7904462	7904724	exon
Flnb	chr14	7904539	A	G	+	0	0	0	1244	1	0.000803213	0	0	0	0	0	0	7904462	7904724	exon
Flnb	chr14	7904545	A	G	+	0	0	0	0	0	0	0	0	0	1483	1	0.000673854	7904462	7904724	exon
Flnb	chr14	7904568	A	G	+	0	0	0	0	0	0	792	1	0.00126103	0	0	0	7904462	7904724	exon
Flnb	chr14	7904577	A	G	+	898	2	0.00222222	0	0	0	0	0	0	0	0	0	7904462	7904724	exon
Flnb	chr14	7904580	A	G	+	0	0	0	0	0	0	782	1	0.00127714	0	0	0	7904462	7904724	exon
Flnb	chr14	7904597	A	G	+	0	0	0	0	0	0	732	2	0.0027248	0	0	0	7904462	7904724	exon
Flnb	chr14	7904602	A	G	+	0	0	0	1095	2	0.00182315	747	1	0.0013369	0	0	0	7904462	7904724	exon
Flnb	chr14	7904646	A	G	+	1124	1	0.000888889	1308	1	0.000763942	0	0	0	0	0	0	7904462	7904724	exon
Flnb	chr14	7904687	A	G	+	1150	1	0.00086881	0	0	0	0	0	0	0	0	0	7904462	7904724	exon
Flnb	chr14	7904719	A	G	+	0	0	0	0	0	0	1099	1	0.000909091	0	0	0	7904462	7904724	exon
Flnb	chr14	7904870	A	G	+	0	0	0	0	0	0	22	1	0.0434783	0	0	0	7904724	7905378	intron
Flnb	chr14	7904988	A	G	+	0	0	0	0	0	0	38	2	0.05	0	0	0	7904724	7905378	intron
Flnb	chr14	7905019	A	G	+	0	0	0	0	0	0	0	0	0	25	1	0.0384615	7904724	7905378	intron
Flnb	chr14	7905448	A	G	+	0	0	0	0	0	0	0	0	0	1596	1	0.000626174	7905378	7905975	exon
Flnb	chr14	7905452	A	G	+	0	0	0	0	0	0	938	1	0.00106496	1554	1	0.000643087	7905378	7905975	exon
Flnb	chr14	7905496	A	G	+	0	0	0	1723	1	0.000580046	0	0	0	0	0	0	7905378	7905975	exon
Flnb	chr14	7905501	A	G	+	0	0	0	1709	1	0.000584795	0	0	0	0	0	0	7905378	7905975	exon
Flnb	chr14	7905520	A	G	+	0	0	0	0	0	0	1218	1	0.000820345	0	0	0	7905378	7905975	exon
Flnb	chr14	7905526	A	G	+	0	0	0	0	0	0	0	0	0	2200	1	0.000454339	7905378	7905975	exon
Flnb	chr14	7905531	A	G	+	0	0	0	0	0	0	0	0	0	2295	1	0.00043554	7905378	7905975	exon
Flnb	chr14	7905566	A	G	+	0	0	0	0	0	0	0	0	0	1963	2	0.00101781	7905378	7905975	exon
Flnb	chr14	7905593	A	G	+	0	0	0	1703	1	0.000586854	0	0	0	0	0	0	7905378	7905975	exon
Flnb	chr14	7905611	A	G	+	0	1481	1	0	1907	1	0	1264	1	0	2381	1	7905378	7905975	exon
Flnb	chr14	7905621	A	G	+	0	0	0	0	0	0	1367	1	0.000730994	0	0	0	7905378	7905975	exon
Flnb	chr14	7905635	A	G	+	1500	1	0.000666223	0	0	0	0	0	0	2350	1	0.000425351	7905378	7905975	exon
Flnb	chr14	7905646	A	G	+	0	0	0	1755	1	0.000569476	0	0	0	0	0	0	7905378	7905975	exon
Flnb	chr14	7905655	A	G	+	0	0	0	0	0	0	1007	1	0.000992063	0	0	0	7905378	7905975	exon
Flnb	chr14	7905668	A	G	+	1356	2	0.00147275	1714	1	0.00058309	0	0	0	0	0	0	7905378	7905975	exon
Flnb	chr14	7905671	A	G	+	1282	1	0.000779423	0	0	0	0	0	0	0	0	0	7905378	7905975	exon
Flnb	chr14	7905677	A	G	+	0	0	0	0	0	0	0	0	0	1696	1	0.000589275	7905378	7905975	exon
Flnb	chr14	7905682	A	G	+	0	0	0	0	0	0	0	0	0	1737	1	0.000575374	7905378	7905975	exon
Flnb	chr14	7905685	A	G	+	0	0	0	0	0	0	1047	2	0.00190658	0	0	0	7905378	7905975	exon
Flnb	chr14	7905692	A	G	+	0	0	0	1308	1	0.000763942	0	0	0	0	0	0	7905378	7905975	exon
Flnb	chr14	7905707	A	G	+	0	0	0	0	0	0	0	0	0	1404	2	0.00142248	7905378	7905975	exon
Flnb	chr14	7905734	A	G	+	0	0	0	0	0	0	799	3	0.00374065	0	0	0	7905378	7905975	exon
Flnb	chr14	7905744	A	G	+	0	0	0	0	0	0	0	0	0	1333	1	0.000749625	7905378	7905975	exon
Flnb	chr14	7905757	A	G	+	0	0	0	1242	1	0.000804505	0	0	0	0	0	0	7905378	7905975	exon
Flnb	chr14	7905773	A	G	+	892	1	0.00111982	0	0	0	0	0	0	0	0	0	7905378	7905975	exon
Flnb	chr14	7905787	A	G	+	865	1	0.00115473	0	0	0	0	0	0	0	0	0	7905378	7905975	exon
Flnb	chr14	7905811	A	G	+	0	0	0	0	0	0	0	0	0	1370	1	0.000729395	7905378	7905975	exon
Flnb	chr14	7905816	A	G	+	0	0	0	0	0	0	873	1	0.00114416	0	0	0	7905378	7905975	exon
Flnb	chr14	7905856	A	G	+	0	0	0	0	0	0	1019	1	0.000980392	0	0	0	7905378	7905975	exon
Flnb	chr14	7905858	A	G	+	0	0	0	0	0	0	1002	1	0.000997009	0	0	0	7905378	7905975	exon
Flnb	chr14	7905864	A	G	+	0	0	0	1375	1	0.000726744	0	0	0	0	0	0	7905378	7905975	exon
Flnb	chr14	7905867	A	G	+	0	0	0	1268	1	0.000788022	0	0	0	0	0	0	7905378	7905975	exon
Flnb	chr14	7905895	A	G	+	0	0	0	1514	1	0.000660066	0	0	0	0	0	0	7905378	7905975	exon
Flnb	chr14	7905919	A	G	+	0	0	0	0	0	0	1266	1	0.000789266	0	0	0	7905378	7905975	exon
Flnb	chr14	7905923	A	G	+	0	0	0	0	0	0	1396	1	0.00071582	2173	1	0.000459982	7905378	7905975	exon
Flnb	chr14	7905929	A	G	+	0	0	0	1979	1	0.000505051	0	0	0	0	0	0	7905378	7905975	exon
Flnb	chr14	7905931	A	G	+	0	0	0	0	0	0	1386	1	0.000720981	0	0	0	7905378	7905975	exon
Flnb	chr14	7905933	A	G	+	1481	1	0.000674764	0	0	0	0	0	0	2100	1	0.000475964	7905378	7905975	exon
Flnb	chr14	7905967	A	G	+	0	0	0	1853	1	0.000539374	1415	1	0.000706215	0	0	0	7905378	7905975	exon
Flnb	chr14	7905968	A	G	+	1500	1	0.000666223	0	0	0	0	0	0	2076	1	0.000481464	7905378	7905975	exon
Flnb	chr14	7906172	A	G	+	0	0	0	0	0	0	0	0	0	47	1	0.0208333	7905975	7907153	intron
Flnb	chr14	7906218	A	G	+	0	28	1	0	18	1	0	19	1	0	47	1	7905975	7907153	intron
Flnb	chr14	7906728	A	G	+	0	0	0	0	0	0	0	0	0	10	1	0.0909091	7905975	7907153	intron
Flnb	chr14	7907059	A	G	+	0	0	0	0	0	0	0	0	0	10	1	0.0909091	7905975	7907153	intron
Flnb	chr14	7907177	A	G	+	0	0	0	0	0	0	0	0	0	1848	1	0.000540833	7907153	7907326	exon
Flnb	chr14	7907182	A	G	+	0	0	0	1516	1	0.000659196	0	0	0	0	0	0	7907153	7907326	exon
Flnb	chr14	7907194	A	G	+	0	0	0	0	0	0	1136	2	0.00175747	0	0	0	7907153	7907326	exon
Flnb	chr14	7907214	A	G	+	0	0	0	1361	1	0.000734214	0	0	0	1580	1	0.000632511	7907153	7907326	exon
Flnb	chr14	7907219	A	G	+	0	0	0	0	0	0	0	0	0	1594	2	0.00125313	7907153	7907326	exon
Flnb	chr14	7907260	A	G	+	0	0	0	1383	1	0.000722543	0	0	0	0	0	0	7907153	7907326	exon
Flnb	chr14	7907275	A	G	+	0	0	0	1595	1	0.000626566	1159	1	0.000862069	0	0	0	7907153	7907326	exon
Flnb	chr14	7907276	A	G	+	1225	1	0.000815661	1633	1	0.000611995	0	0	0	0	0	0	7907153	7907326	exon
Flnb	chr14	7907281	A	G	+	0	0	0	1647	1	0.000606796	0	0	0	0	0	0	7907153	7907326	exon
Flnb	chr14	7907300	A	G	+	0	0	0	0	0	0	1205	2	0.001657	0	0	0	7907153	7907326	exon
Flnb	chr14	7907309	A	G	+	1166	1	0.000856898	0	0	0	0	0	0	1792	2	0.00111483	7907153	7907326	exon
Flnb	chr14	7907325	A	G	+	0	0	0	0	0	0	0	0	0	1498	1	0.000667111	7907153	7907326	exon
Flnb	chr14	7907364	A	G	+	30	1	0.0322581	0	0	0	0	0	0	0	0	0	7907326	7908522	intron
Flnb	chr14	7907447	A	G	+	0	45	1	0	33	1	0	22	1	0	27	1	7907326	7908522	intron
Flnb	chr14	7907954	A	G	+	0	4	1	0	5	1	0	3	1	0	5	1	7907326	7908522	intron
Flnb	chr14	7907989	A	G	+	0	10	1	0	9	1	0	5	1	0	12	1	7907326	7908522	intron
Flnb	chr14	7908378	A	G	+	0	0	0	0	0	0	17	1	0.0555556	0	0	0	7907326	7908522	intron
Flnb	chr14	7908528	A	G	+	0	0	0	1299	1	0.000769231	0	0	0	0	0	0	7908522	7908684	exon
Flnb	chr14	7908542	A	G	+	0	0	0	0	0	0	0	0	0	1500	1	0.000666223	7908522	7908684	exon
Flnb	chr14	7908560	A	G	+	0	0	0	991	1	0.00100806	0	0	0	0	0	0	7908522	7908684	exon
Flnb	chr14	7908574	A	G	+	0	0	0	0	0	0	607	1	0.00164474	0	0	0	7908522	7908684	exon
Flnb	chr14	7908603	A	G	+	0	0	0	0	0	0	0	0	0	1006	1	0.000993049	7908522	7908684	exon
Flnb	chr14	7908640	A	G	+	0	0	0	0	0	0	0	0	0	995	1	0.00100402	7908522	7908684	exon
Flnb	chr14	7908642	A	G	+	0	0	0	0	0	0	0	0	0	973	1	0.00102669	7908522	7908684	exon
Flnb	chr14	7908680	A	G	+	648	1	0.00154083	0	0	0	0	0	0	0	0	0	7908522	7908684	exon
Flnb	chr14	7908687	A	G	+	14	2	0.125	11	2	0.153846	8	4	0.333333	10	3	0.230769	7908684	7909609	intron
Flnb	chr14	7908833	A	G	+	15	1	0.0625	0	0	0	0	0	0	0	0	0	7908684	7909609	intron
Flnb	chr14	7908835	A	G	+	0	0	0	0	0	0	0	0	0	16	1	0.0588235	7908684	7909609	intron
Flnb	chr14	7909619	A	G	+	701	1	0.0014245	0	0	0	0	0	0	0	0	0	7909609	7909769	exon
Flnb	chr14	7909644	A	G	+	0	0	0	0	0	0	800	1	0.00124844	1278	1	0.000781861	7909609	7909769	exon
Flnb	chr14	7909661	A	G	+	0	0	0	0	0	0	0	0	0	1371	1	0.000728863	7909609	7909769	exon
Flnb	chr14	7909679	A	G	+	0	0	0	1172	1	0.000852515	0	0	0	0	0	0	7909609	7909769	exon
Flnb	chr14	7909686	A	G	+	882	3	0.00338983	1171	2	0.00170503	866	1	0.0011534	0	0	0	7909609	7909769	exon
Flnb	chr14	7909697	A	G	+	840	1	0.00118906	0	0	0	0	0	0	0	0	0	7909609	7909769	exon
Flnb	chr14	7909704	A	G	+	0	0	0	1091	1	0.000915751	0	0	0	0	0	0	7909609	7909769	exon
Flnb	chr14	7909723	A	G	+	0	0	0	0	0	0	6	682	0.991279	1	1096	0.999088	7909609	7909769	exon
Flnb	chr14	7909731	A	G	+	0	0	0	0	0	0	0	0	0	1147	1	0.00087108	7909609	7909769	exon
Flnb	chr14	7909734	A	G	+	0	0	0	988	1	0.00101112	0	0	0	0	0	0	7909609	7909769	exon
Flnb	chr14	7909742	A	G	+	796	1	0.00125471	0	0	0	0	0	0	0	0	0	7909609	7909769	exon
Flnb	chr14	7909761	A	G	+	824	1	0.00121212	0	0	0	0	0	0	0	0	0	7909609	7909769	exon
Flnb	chr14	7909915	A	G	+	0	0	0	0	0	0	21	2	0.0869565	0	0	0	7909769	7912955	intron
Flnb	chr14	7910933	A	G	+	19	1	0.05	0	0	0	0	0	0	0	0	0	7909769	7912955	intron
Flnb	chr14	7911243	A	G	+	0	15	1	0	7	1	0	16	1	0	8	1	7909769	7912955	intron
Flnb	chr14	7911372	A	G	+	28	1	0.0344828	0	0	0	0	0	0	0	0	0	7909769	7912955	intron
Flnb	chr14	7912132	A	G	+	0	0	0	0	0	0	10	1	0.0909091	0	0	0	7909769	7912955	intron
Flnb	chr14	7912957	A	G	+	0	0	0	1090	1	0.00091659	0	0	0	0	0	0	7912955	7913122	exon
Flnb	chr14	7912991	A	G	+	0	0	0	0	0	0	0	0	0	1300	1	0.00076864	7912955	7913122	exon
Flnb	chr14	7912999	A	G	+	818	1	0.001221	0	0	0	0	0	0	0	0	0	7912955	7913122	exon
Flnb	chr14	7913005	A	G	+	0	0	0	0	0	0	0	0	0	1284	1	0.00077821	7912955	7913122	exon
Flnb	chr14	7913026	A	G	+	0	0	0	1042	1	0.000958773	0	0	0	0	0	0	7912955	7913122	exon
Flnb	chr14	7913047	A	G	+	0	0	0	0	0	0	0	0	0	1105	1	0.000904159	7912955	7913122	exon
Flnb	chr14	7913069	A	G	+	817	1	0.00122249	0	0	0	0	0	0	0	0	0	7912955	7913122	exon
Flnb	chr14	7913078	A	G	+	0	0	0	0	0	0	837	1	0.00119332	0	0	0	7912955	7913122	exon
Flnb	chr14	7913119	A	G	+	0	0	0	0	0	0	1125	1	0.000888099	1733	1	0.000576701	7912955	7913122	exon
Flnb	chr14	7913121	A	G	+	1086	1	0.000919963	0	0	0	0	0	0	0	0	0	7912955	7913122	exon
Flnb	chr14	7913313	A	G	+	0	15	1	0	12	1	0	5	1	0	11	1	7913122	7915261	intron
Flnb	chr14	7914090	A	G	+	0	0	0	0	0	0	0	0	0	18	1	0.0526316	7913122	7915261	intron
Flnb	chr14	7914494	A	G	+	13	1	0.0714286	0	0	0	0	0	0	0	0	0	7913122	7915261	intron
Flnb	chr14	7914735	A	G	+	0	0	0	0	0	0	23	1	0.0416667	0	0	0	7913122	7915261	intron
Flnb	chr14	7914862	A	G	+	0	0	0	0	0	0	11	1	0.0833333	0	0	0	7913122	7915261	intron
Flnb	chr14	7915270	A	G	+	0	0	0	0	0	0	0	0	0	1754	1	0.000569801	7915261	7915384	exon
Flnb	chr14	7915278	A	G	+	0	0	0	0	0	0	1144	1	0.000873362	0	0	0	7915261	7915384	exon
Flnb	chr14	7915288	A	G	+	0	0	0	1748	1	0.000571755	0	0	0	0	0	0	7915261	7915384	exon
Flnb	chr14	7915302	A	G	+	0	0	0	0	0	0	1224	1	0.000816327	1922	1	0.000520021	7915261	7915384	exon
Flnb	chr14	7915314	A	G	+	1238	2	0.0016129	0	0	0	0	0	0	0	0	0	7915261	7915384	exon
Flnb	chr14	7915325	A	G	+	1213	1	0.000823723	0	0	0	0	0	0	0	0	0	7915261	7915384	exon
Flnb	chr14	7915330	A	G	+	0	0	0	0	0	0	0	0	0	1927	2	0.00103681	7915261	7915384	exon
Flnb	chr14	7915333	A	G	+	0	0	0	1682	5	0.00296384	1205	6	0.00495458	1958	1	0.000510465	7915261	7915384	exon
Flnb	chr14	7915342	A	G	+	0	0	0	0	0	0	1100	1	0.000908265	0	0	0	7915261	7915384	exon
Flnb	chr14	7915382	A	G	+	0	0	0	1560	1	0.000640615	0	0	0	0	0	0	7915261	7915384	exon
Flnb	chr14	7915537	A	G	+	0	0	0	19	1	0.05	0	0	0	0	0	0	7915384	7915947	intron
Flnb	chr14	7915961	A	G	+	0	0	0	0	0	0	1175	1	0.00085034	0	0	0	7915947	7916103	exon
Flnb	chr14	7915979	A	G	+	1181	1	0.000846024	0	0	0	0	0	0	1908	1	0.000523834	7915947	7916103	exon
Flnb	chr14	7915983	A	G	+	0	0	0	0	0	0	1080	1	0.000925069	0	0	0	7915947	7916103	exon
Flnb	chr14	7915989	A	G	+	0	0	0	1484	1	0.000673401	0	0	0	0	0	0	7915947	7916103	exon
Flnb	chr14	7915993	A	G	+	0	0	0	0	0	0	0	0	0	1895	2	0.0010543	7915947	7916103	exon
Flnb	chr14	7916065	A	G	+	0	0	0	0	0	0	1228	2	0.00162602	2229	1	0.00044843	7915947	7916103	exon
Flnb	chr14	7916067	A	G	+	0	0	0	1871	1	0.000534188	0	0	0	0	0	0	7915947	7916103	exon
Flnb	chr14	7916069	A	G	+	0	0	0	1870	1	0.000534474	0	0	0	2211	1	0.00045208	7915947	7916103	exon
Flnb	chr14	7916078	A	G	+	0	0	0	0	0	0	1316	1	0.000759301	0	0	0	7915947	7916103	exon
Flnb	chr14	7916079	A	G	+	0	0	0	0	0	0	0	0	0	2459	2	0.000812678	7915947	7916103	exon
Flnb	chr14	7916098	A	G	+	0	0	0	0	0	0	0	0	0	3087	2	0.000647459	7915947	7916103	exon
Flnb	chr14	7916182	A	G	+	0	0	0	0	0	0	11	1	0.0833333	5	1	0.166667	7916103	7917194	intron
Flnb	chr14	7916200	A	G	+	0	0	0	0	0	0	15	1	0.0625	7	1	0.125	7916103	7917194	intron
Flnb	chr14	7916311	A	G	+	14	1	0.0666667	0	0	0	0	0	0	0	0	0	7916103	7917194	intron
Flnb	chr14	7916795	A	G	+	0	0	0	15	1	0.0625	0	0	0	0	0	0	7916103	7917194	intron
Flnb	chr14	7916938	A	G	+	12	1	0.0769231	0	0	0	0	0	0	0	0	0	7916103	7917194	intron
Flnb	chr14	7917119	A	G	+	0	0	0	12	1	0.0769231	0	0	0	0	0	0	7916103	7917194	intron
Flnb	chr14	7917192	A	G	+	0	0	0	0	0	0	0	0	0	11	1	0.0833333	7916103	7917194	intron
Flnb	chr14	7917198	A	G	+	0	0	0	2581	1	0.000387297	0	0	0	0	0	0	7917194	7917383	exon
Flnb	chr14	7917215	A	G	+	0	0	0	0	0	0	1577	1	0.000633714	0	0	0	7917194	7917383	exon
Flnb	chr14	7917217	A	G	+	0	0	0	2458	1	0.000406669	0	0	0	2961	1	0.00033761	7917194	7917383	exon
Flnb	chr14	7917221	A	G	+	0	0	0	0	0	0	1523	2	0.00131148	0	0	0	7917194	7917383	exon
Flnb	chr14	7917228	A	G	+	1547	1	0.000645995	0	0	0	1403	1	0.000712251	0	0	0	7917194	7917383	exon
Flnb	chr14	7917233	A	G	+	1387	1	0.000720461	0	0	0	1231	1	0.000811688	0	0	0	7917194	7917383	exon
Flnb	chr14	7917234	A	G	+	0	0	0	0	0	0	1218	1	0.000820345	0	0	0	7917194	7917383	exon
Flnb	chr14	7917240	A	G	+	1301	1	0.000768049	0	0	0	0	0	0	0	0	0	7917194	7917383	exon
Flnb	chr14	7917257	A	G	+	0	0	0	1896	1	0.000527148	0	0	0	0	0	0	7917194	7917383	exon
Flnb	chr14	7917263	A	G	+	0	0	0	0	0	0	1258	1	0.000794281	0	0	0	7917194	7917383	exon
Flnb	chr14	7917270	A	G	+	0	0	0	1816	1	0.000550358	0	0	0	0	0	0	7917194	7917383	exon
Flnb	chr14	7917275	A	G	+	0	0	0	1808	1	0.000552792	0	0	0	0	0	0	7917194	7917383	exon
Flnb	chr14	7917280	A	G	+	1169	1	0.000854701	0	0	0	0	0	0	0	0	0	7917194	7917383	exon
Flnb	chr14	7917347	A	G	+	1142	2	0.00174825	0	0	0	0	0	0	1808	1	0.000552792	7917194	7917383	exon
Flnb	chr14	7917355	A	G	+	0	0	0	1709	2	0.00116891	0	0	0	1995	1	0.000501002	7917194	7917383	exon
Flnb	chr14	7917382	A	G	+	0	0	0	0	0	0	1094	1	0.000913242	0	0	0	7917194	7917383	exon
Flnb	chr14	7917685	A	G	+	0	0	0	13	1	0.0714286	0	0	0	0	0	0	7917383	7919110	intron
Flnb	chr14	7918424	A	G	+	16	1	0.0588235	0	0	0	0	0	0	0	0	0	7917383	7919110	intron
Flnb	chr14	7919146	A	G	+	1308	2	0.00152672	0	0	0	0	0	0	0	0	0	7919110	7919357	exon
Flnb	chr14	7919164	A	G	+	0	0	0	1985	1	0.000503525	0	0	0	0	0	0	7919110	7919357	exon
Flnb	chr14	7919170	A	G	+	0	0	0	0	0	0	0	0	0	2098	1	0.000476417	7919110	7919357	exon
Flnb	chr14	7919172	A	G	+	1323	1	0.000755287	0	0	0	0	0	0	0	0	0	7919110	7919357	exon
Flnb	chr14	7919177	A	G	+	0	0	0	1754	1	0.000569801	0	0	0	0	0	0	7919110	7919357	exon
Flnb	chr14	7919187	A	G	+	0	0	0	0	0	0	1153	1	0.000866551	0	0	0	7919110	7919357	exon
Flnb	chr14	7919193	A	G	+	0	0	0	0	0	0	0	0	0	2112	1	0.000473261	7919110	7919357	exon
Flnb	chr14	7919213	A	G	+	0	0	0	0	0	0	1112	1	0.000898473	0	0	0	7919110	7919357	exon
Flnb	chr14	7919220	A	G	+	1239	1	0.000806452	0	0	0	0	0	0	0	0	0	7919110	7919357	exon
Flnb	chr14	7919247	A	G	+	1152	1	0.000867303	0	0	0	0	0	0	0	0	0	7919110	7919357	exon
Flnb	chr14	7919252	A	G	+	1112	1	0.000898473	0	0	0	1030	1	0.000969932	0	0	0	7919110	7919357	exon
Flnb	chr14	7919268	A	G	+	879	1	0.00113636	0	0	0	0	0	0	0	0	0	7919110	7919357	exon
Flnb	chr14	7919299	A	G	+	1106	1	0.000903342	0	0	0	0	0	0	0	0	0	7919110	7919357	exon
Flnb	chr14	7919304	A	G	+	0	0	0	0	0	0	0	0	0	1946	1	0.000513611	7919110	7919357	exon
Flnb	chr14	7919331	A	G	+	0	0	0	0	0	0	0	0	0	2147	1	0.000465549	7919110	7919357	exon
Flnb	chr14	7919337	A	G	+	1237	1	0.000807754	0	0	0	0	0	0	0	0	0	7919110	7919357	exon
Flnb	chr14	7919351	A	G	+	1147	1	0.00087108	0	0	0	0	0	0	0	0	0	7919110	7919357	exon
Flnb	chr14	7919355	A	G	+	1169	1	0.000854701	0	0	0	0	0	0	0	0	0	7919110	7919357	exon
Flnb	chr14	7919416	A	G	+	0	0	0	42	2	0.0454545	0	0	0	0	0	0	7919357	7922675	intron
Flnb	chr14	7919688	A	G	+	0	0	0	0	0	0	49	1	0.02	0	0	0	7919357	7922675	intron
Flnb	chr14	7919780	A	G	+	0	0	0	0	0	0	52	1	0.0188679	0	0	0	7919357	7922675	intron
Flnb	chr14	7920448	A	G	+	0	45	1	0	34	1	0	30	1	1	42	0.976744	7919357	7922675	intron
Flnb	chr14	7920519	A	G	+	49	1	0.02	0	0	0	0	0	0	0	0	0	7919357	7922675	intron
Flnb	chr14	7920627	A	G	+	0	0	0	0	0	0	43	1	0.0227273	0	0	0	7919357	7922675	intron
Flnb	chr14	7920634	A	G	+	0	0	0	38	1	0.025641	0	0	0	0	0	0	7919357	7922675	intron
Flnb	chr14	7920636	A	G	+	76	1	0.012987	0	0	0	0	0	0	0	0	0	7919357	7922675	intron
Flnb	chr14	7921098	A	G	+	1	68	0.985507	0	30	1	0	40	1	0	58	1	7919357	7922675	intron
Flnb	chr14	7921452	A	G	+	0	0	0	0	0	0	0	0	0	40	1	0.0243902	7919357	7922675	intron
Flnb	chr14	7921719	A	G	+	0	0	0	0	0	0	39	1	0.025	0	0	0	7919357	7922675	intron
Flnb	chr14	7921732	A	G	+	0	0	0	26	1	0.037037	0	0	0	0	0	0	7919357	7922675	intron
Flnb	chr14	7922408	A	G	+	0	0	0	0	0	0	0	0	0	70	1	0.0140845	7919357	7922675	intron
Flnb	chr14	7922699	A	G	+	0	0	0	0	0	0	979	1	0.00102041	0	0	0	7922675	7922713	exon
Flnb	chr14	7922703	A	G	+	1116	1	0.000895255	0	0	0	1017	1	0.000982318	0	0	0	7922675	7922713	exon
Flnb	chr14	7922710	A	G	+	0	0	0	1290	1	0.000774593	0	0	0	0	0	0	7922675	7922713	exon
Flnb	chr14	7922734	A	G	+	303	1	0.00328947	0	0	0	0	0	0	0	0	0	7922675	7922746	exon
Flnb	chr14	7923407	A	G	+	0	0	0	37	1	0.0263158	0	0	0	0	0	0	7922746	7923455	intron
Flnb	chr14	7923463	A	G	+	0	0	0	0	0	0	1061	1	0.00094162	0	0	0	7923455	7923557	exon
Flnb	chr14	7923465	A	G	+	0	0	0	0	0	0	1099	1	0.000909091	0	0	0	7923455	7923557	exon
Flnb	chr14	7923482	A	G	+	0	0	0	1495	2	0.00133601	0	0	0	0	0	0	7923455	7923557	exon
Flnb	chr14	7923516	A	G	+	0	0	0	0	0	0	0	0	0	1828	1	0.000546747	7923455	7923557	exon
Flnb	chr14	7923543	A	G	+	1233	1	0.000810373	0	0	0	0	0	0	0	0	0	7923455	7923557	exon
Flnb	chr14	7923544	A	G	+	0	0	0	0	0	0	0	0	0	2070	1	0.000482859	7923455	7923557	exon
Flnb	chr14	7923547	A	G	+	0	0	0	0	0	0	1123	1	0.00088968	0	0	0	7923455	7923557	exon
Flnb	chr14	7923549	A	G	+	0	0	0	1562	1	0.000639795	0	0	0	0	0	0	7923455	7923557	exon
Flnb	chr14	7923550	A	G	+	0	0	0	0	0	0	0	0	0	1883	1	0.000530786	7923455	7923557	exon
Flnb	chr14	7924175	A	G	+	0	0	0	0	0	0	974	1	0.00102564	0	0	0	7924173	7924313	exon
Flnb	chr14	7924200	A	G	+	0	0	0	0	0	0	0	0	0	1815	1	0.000550661	7924173	7924313	exon
Flnb	chr14	7924221	A	G	+	1262	1	0.000791766	0	0	0	0	0	0	0	0	0	7924173	7924313	exon
Flnb	chr14	7924223	A	G	+	1316	2	0.00151745	0	0	0	0	0	0	0	0	0	7924173	7924313	exon
Flnb	chr14	7924226	A	G	+	0	0	0	0	0	0	1190	1	0.000839631	0	0	0	7924173	7924313	exon
Flnb	chr14	7924227	A	G	+	0	0	0	0	0	0	0	0	0	1965	1	0.000508647	7924173	7924313	exon
Flnb	chr14	7924230	A	G	+	0	0	0	1571	1	0.000636132	0	0	0	1979	1	0.000505051	7924173	7924313	exon
Flnb	chr14	7924241	A	G	+	0	0	0	0	0	0	1055	1	0.00094697	0	0	0	7924173	7924313	exon
Flnb	chr14	7924247	A	G	+	0	0	0	1441	1	0.000693481	0	0	0	0	0	0	7924173	7924313	exon
Flnb	chr14	7924251	A	G	+	0	0	0	1434	1	0.000696864	0	0	0	0	0	0	7924173	7924313	exon
Flnb	chr14	7924259	A	G	+	0	0	0	1374	1	0.000727273	0	0	0	0	0	0	7924173	7924313	exon
Flnb	chr14	7924263	A	G	+	1106	1	0.000903342	1345	1	0.000742942	0	0	0	0	0	0	7924173	7924313	exon
Flnb	chr14	7924275	A	G	+	0	0	0	0	0	0	0	0	0	1570	1	0.000636537	7924173	7924313	exon
Flnb	chr14	7924280	A	G	+	1051	1	0.00095057	0	0	0	0	0	0	0	0	0	7924173	7924313	exon
Flnb	chr14	7924295	A	G	+	1029	1	0.000970874	0	0	0	1044	1	0.000956938	1547	1	0.000645995	7924173	7924313	exon
Flnb	chr14	7924307	A	G	+	0	0	0	0	0	0	0	0	0	1679	1	0.000595238	7924173	7924313	exon
Flnb	chr14	7924316	A	G	+	0	0	0	0	0	0	17	1	0.0555556	0	0	0	7924313	7926383	intron
Flnb	chr14	7924487	A	G	+	0	0	0	0	0	0	11	1	0.0833333	0	0	0	7924313	7926383	intron
Flnb	chr14	7924884	A	G	+	25	1	0.0384615	0	0	0	0	0	0	0	0	0	7924313	7926383	intron
Flnb	chr14	7925837	A	G	+	0	33	1	0	21	1	0	18	1	0	17	1	7924313	7926383	intron
Flnb	chr14	7926410	A	G	+	0	0	0	0	0	0	1019	2	0.00195886	0	0	0	7926383	7926511	exon
Flnb	chr14	7926444	A	G	+	0	0	0	0	0	0	988	1	0.00101112	0	0	0	7926383	7926511	exon
Flnb	chr14	7926462	A	G	+	994	1	0.00100503	0	0	0	0	0	0	0	0	0	7926383	7926511	exon
Flnb	chr14	7926478	A	G	+	0	0	0	0	0	0	0	0	0	1431	1	0.000698324	7926383	7926511	exon
Flnb	chr14	7926493	A	G	+	1179	2	0.00169348	0	0	0	1084	2	0.00184162	0	0	0	7926383	7926511	exon
Flnb	chr14	7926500	A	G	+	0	0	0	1627	1	0.000614251	0	0	0	0	0	0	7926383	7926511	exon
Flnb	chr14	7926507	A	G	+	1299	1	0.000769231	0	0	0	1140	1	0.000876424	0	0	0	7926383	7926511	exon
Flnb	chr14	7926509	A	G	+	0	0	0	0	0	0	0	0	0	1994	1	0.000501253	7926383	7926511	exon
Flnb	chr14	7926542	A	G	+	0	21	1	0	13	1	0	8	1	0	8	1	7926511	7927346	intron
Flnb	chr14	7926545	A	G	+	0	21	1	0	13	1	0	8	1	0	8	1	7926511	7927346	intron
Flnb	chr14	7926768	A	G	+	0	0	0	0	0	0	0	0	0	4	1	0.2	7926511	7927346	intron
Flnb	chr14	7927367	A	G	+	0	0	0	2045	1	0.000488759	0	0	0	2419	1	0.000413223	7927346	7927519	exon
Flnb	chr14	7927368	A	G	+	1543	3	0.00194049	2033	2	0.000982801	0	0	0	2400	1	0.000416493	7927346	7927519	exon
Flnb	chr14	7927378	A	G	+	0	0	0	2054	1	0.000486618	0	0	0	0	0	0	7927346	7927519	exon
Flnb	chr14	7927380	A	G	+	0	0	0	2062	1	0.000484731	0	0	0	0	0	0	7927346	7927519	exon
Flnb	chr14	7927409	A	G	+	0	0	0	0	0	0	0	0	0	2220	1	0.000450248	7927346	7927519	exon
Flnb	chr14	7927416	A	G	+	0	0	0	0	0	0	1024	1	0.00097561	0	0	0	7927346	7927519	exon
Flnb	chr14	7927422	A	G	+	0	0	0	1637	2	0.00122026	0	0	0	0	0	0	7927346	7927519	exon
Flnb	chr14	7927426	A	G	+	0	0	0	1611	1	0.000620347	0	0	0	0	0	0	7927346	7927519	exon
Flnb	chr14	7927468	A	G	+	0	0	0	0	0	0	0	0	0	1538	1	0.000649773	7927346	7927519	exon
Flnb	chr14	7927474	A	G	+	0	0	0	1358	1	0.000735835	1002	1	0.000997009	0	0	0	7927346	7927519	exon
Flnb	chr14	7927480	A	G	+	0	0	0	1372	2	0.0014556	0	0	0	0	0	0	7927346	7927519	exon
Flnb	chr14	7927481	A	G	+	1041	1	0.000959693	0	0	0	0	0	0	0	0	0	7927346	7927519	exon
Flnb	chr14	7927495	A	G	+	1195	1	0.00083612	0	0	0	0	0	0	0	0	0	7927346	7927519	exon
Flnb	chr14	7927518	A	G	+	1409	1	0.00070922	0	0	0	0	0	0	0	0	0	7927346	7927519	exon
Flnb	chr14	7927557	A	G	+	0	21	1	0	10	1	0	20	1	0	10	1	7927519	7929001	intron
Flnb	chr14	7927631	A	G	+	0	34	1	0	14	1	0	19	1	0	6	1	7927519	7929001	intron
Flnb	chr14	7927757	A	G	+	0	31	1	1	11	0.916667	0	16	1	0	8	1	7927519	7929001	intron
Flnb	chr14	7928054	A	G	+	0	10	1	0	3	1	0	10	1	0	4	1	7927519	7929001	intron
Flnb	chr14	7928246	A	G	+	0	0	0	0	0	0	0	0	0	0	1	1	7927519	7929001	intron
Flnb	chr14	7928556	A	G	+	0	0	0	9	1	0.1	0	0	0	0	0	0	7927519	7929001	intron
Flnb	chr14	7928584	A	G	+	0	23	1	0	11	1	0	10	1	0	13	1	7927519	7929001	intron
Flnb	chr14	7928854	A	G	+	0	11	1	0	10	1	0	11	1	0	9	1	7927519	7929001	intron
Flnb	chr14	7929009	A	G	+	1421	1	0.000703235	0	0	0	0	0	0	0	0	0	7929001	7929159	exon
Flnb	chr14	7929038	A	G	+	1483	1	0.000673854	1920	2	0.00104058	0	0	0	0	0	0	7929001	7929159	exon
Flnb	chr14	7929046	A	G	+	1544	1	0.000647249	0	0	0	0	0	0	0	0	0	7929001	7929159	exon
Flnb	chr14	7929058	A	G	+	0	0	0	2170	1	0.000460617	0	0	0	2590	2	0.000771605	7929001	7929159	exon
Flnb	chr14	7929063	A	G	+	0	0	0	0	0	0	0	0	0	2651	2	0.000753864	7929001	7929159	exon
Flnb	chr14	7929071	A	G	+	0	0	0	0	2076	1	1	1493	0.999331	0	2522	1	7929001	7929159	exon
Flnb	chr14	7929078	A	G	+	0	0	0	0	0	0	1381	1	0.000723589	0	0	0	7929001	7929159	exon
Flnb	chr14	7929087	A	G	+	1349	1	0.000740741	0	0	0	0	0	0	2088	1	0.000478698	7929001	7929159	exon
Flnb	chr14	7929089	A	G	+	1317	2	0.0015163	1701	1	0.000587544	0	0	0	2051	1	0.000487329	7929001	7929159	exon
Flnb	chr14	7929099	A	G	+	0	0	0	1704	1	0.00058651	0	0	0	0	0	0	7929001	7929159	exon
Flnb	chr14	7929135	A	G	+	0	0	0	1685	2	0.00118554	0	0	0	0	0	0	7929001	7929159	exon
Flnb	chr14	7929138	A	G	+	0	0	0	1734	1	0.000576369	0	0	0	0	0	0	7929001	7929159	exon
Flnb	chr14	7929150	A	G	+	0	0	0	0	0	0	1117	1	0.000894454	1729	1	0.000578035	7929001	7929159	exon
Flnb	chr14	7929454	A	G	+	0	0	0	11	1	0.0833333	0	0	0	0	0	0	7929159	7929759	intron
Flnb	chr14	7929471	A	G	+	0	0	0	0	0	0	15	1	0.0625	0	0	0	7929159	7929759	intron
Flnb	chr14	7929609	A	G	+	18	1	0.0526316	0	0	0	0	0	0	0	0	0	7929159	7929759	intron
Flnb	chr14	7929780	A	G	+	0	0	0	1219	1	0.000819672	0	0	0	0	0	0	7929759	7929962	exon
Flnb	chr14	7929781	A	G	+	1	988	0.998989	0	1210	1	0	886	1	0	1378	1	7929759	7929962	exon
Flnb	chr14	7929800	A	G	+	1211	1	0.000825083	0	0	0	0	0	0	0	0	0	7929759	7929962	exon
Flnb	chr14	7929803	A	G	+	0	0	0	0	0	0	1000	1	0.000999001	0	0	0	7929759	7929962	exon
Flnb	chr14	7929811	A	G	+	0	960	1	0	0	0	0	900	1	0	1400	1	7929759	7929962	exon
Flnb	chr14	7929812	A	G	+	0	0	0	0	0	0	0	0	0	1434	1	0.000696864	7929759	7929962	exon
Flnb	chr14	7929883	A	G	+	1020	2	0.00195695	0	0	0	918	1	0.00108814	0	0	0	7929759	7929962	exon
Flnb	chr14	7929888	A	G	+	949	1	0.00105263	0	0	0	0	0	0	0	0	0	7929759	7929962	exon
Flnb	chr14	7929894	A	G	+	0	0	0	1267	1	0.000788644	0	0	0	0	0	0	7929759	7929962	exon
Flnb	chr14	7929929	A	G	+	0	0	0	0	0	0	0	0	0	1739	1	0.000574713	7929759	7929962	exon
Flnb	chr14	7929934	A	G	+	0	0	0	0	0	0	0	0	0	1792	1	0.000557724	7929759	7929962	exon
Flnb	chr14	7929953	A	G	+	1212	1	0.000824402	0	0	0	0	0	0	0	0	0	7929759	7929962	exon
Flnb	chr14	7930045	A	G	+	0	0	0	0	0	0	9	1	0.1	0	0	0	7929962	7930763	intron
Flnb	chr14	7930101	A	G	+	32	1	0.030303	0	0	0	0	0	0	0	0	0	7929962	7930763	intron
Flnb	chr14	7930380	A	G	+	0	0	0	8	1	0.111111	0	0	0	0	0	0	7929962	7930763	intron
Flnb	chr14	7930774	A	G	+	1306	1	0.000765111	0	0	0	1125	1	0.000888099	0	0	0	7930763	7930915	exon
Flnb	chr14	7930788	A	G	+	0	0	0	1498	1	0.000667111	0	0	0	0	0	0	7930763	7930915	exon
Flnb	chr14	7930791	A	G	+	0	0	0	0	0	0	0	0	0	1888	1	0.000529381	7930763	7930915	exon
Flnb	chr14	7930798	A	G	+	1286	1	0.000777001	0	0	0	0	0	0	0	0	0	7930763	7930915	exon
Flnb	chr14	7930820	A	G	+	1322	1	0.000755858	1547	1	0.000645995	0	0	0	0	0	0	7930763	7930915	exon
Flnb	chr14	7930832	A	G	+	0	0	0	1509	1	0.000662252	1187	2	0.00168209	0	0	0	7930763	7930915	exon
Flnb	chr14	7930837	A	G	+	0	0	0	1505	1	0.000664011	0	0	0	0	0	0	7930763	7930915	exon
Flnb	chr14	7930843	A	G	+	0	0	0	0	0	0	0	0	0	1786	1	0.000559597	7930763	7930915	exon
Flnb	chr14	7930901	A	G	+	0	0	0	0	0	0	1047	1	0.000954198	0	0	0	7930763	7930915	exon
Flnb	chr14	7930918	A	G	+	19	1	0.05	0	0	0	0	0	0	0	0	0	7930915	7931024	intron
Flnb	chr14	7931025	A	G	+	979	1	0.00102041	0	0	0	0	0	0	0	0	0	7931024	7931146	exon
Flnb	chr14	7931041	A	G	+	0	0	0	0	0	0	792	1	0.00126103	0	0	0	7931024	7931146	exon
Flnb	chr14	7931047	A	G	+	0	0	0	1152	1	0.000867303	0	0	0	0	0	0	7931024	7931146	exon
Flnb	chr14	7931054	A	G	+	0	0	0	0	0	0	0	0	0	1382	1	0.000723066	7931024	7931146	exon
Flnb	chr14	7931058	A	G	+	0	0	0	0	0	0	0	0	0	1336	1	0.000747943	7931024	7931146	exon
Flnb	chr14	7931065	A	G	+	990	1	0.00100908	0	0	0	0	0	0	0	0	0	7931024	7931146	exon
Flnb	chr14	7931067	A	G	+	0	0	0	0	0	0	0	0	0	1378	1	0.000725163	7931024	7931146	exon
Flnb	chr14	7931069	A	G	+	0	0	0	1134	3	0.00263852	934	1	0.00106952	0	0	0	7931024	7931146	exon
Flnb	chr14	7931077	A	G	+	895	1	0.00111607	0	0	0	0	0	0	0	0	0	7931024	7931146	exon
Flnb	chr14	7931131	A	G	+	1199	1	0.000833333	0	0	0	0	0	0	0	0	0	7931024	7931146	exon
Flnb	chr14	7931169	A	G	+	0	0	0	67	1	0.0147059	0	0	0	0	0	0	7931146	7933714	intron
Flnb	chr14	7931359	A	G	+	0	0	0	0	0	0	30	1	0.0322581	0	0	0	7931146	7933714	intron
Flnb	chr14	7931749	A	G	+	0	0	0	0	0	0	27	1	0.0357143	0	0	0	7931146	7933714	intron
Flnb	chr14	7931828	A	G	+	0	0	0	0	0	0	0	0	0	36	1	0.027027	7931146	7933714	intron
Flnb	chr14	7932053	A	G	+	0	0	0	0	0	0	0	0	0	56	1	0.0175439	7931146	7933714	intron
Flnb	chr14	7932111	A	G	+	0	0	0	50	1	0.0196078	0	0	0	0	0	0	7931146	7933714	intron
Flnb	chr14	7932230	A	G	+	74	1	0.0133333	0	0	0	0	0	0	0	0	0	7931146	7933714	intron
Flnb	chr14	7932927	A	G	+	0	0	0	41	1	0.0238095	0	0	0	0	0	0	7931146	7933714	intron
Flnb	chr14	7933188	A	G	+	0	0	0	28	1	0.0344828	0	0	0	0	0	0	7931146	7933714	intron
Flnb	chr14	7933324	A	G	+	0	0	0	0	0	0	0	0	0	48	1	0.0204082	7931146	7933714	intron
Flnb	chr14	7933406	A	G	+	55	1	0.0178571	0	0	0	0	0	0	0	0	0	7931146	7933714	intron
Flnb	chr14	7933585	A	G	+	79	1	0.0125	0	0	0	0	0	0	0	0	0	7931146	7933714	intron
Flnb	chr14	7933714	A	G	+	0	0	0	0	0	0	0	0	0	1409	1	0.00070922	7933714	7933980	exon
Flnb	chr14	7933716	A	G	+	0	0	0	0	0	0	935	2	0.00213447	1410	1	0.000708717	7933714	7933980	exon
Flnb	chr14	7933725	A	G	+	1061	1	0.00094162	0	0	0	0	0	0	0	0	0	7933714	7933980	exon
Flnb	chr14	7933729	A	G	+	0	0	0	1374	1	0.000727273	0	0	0	0	0	0	7933714	7933980	exon
Flnb	chr14	7933746	A	G	+	0	0	0	1343	1	0.000744048	0	0	0	0	0	0	7933714	7933980	exon
Flnb	chr14	7933749	A	G	+	1024	2	0.00194932	0	0	0	0	0	0	1444	2	0.00138313	7933714	7933980	exon
Flnb	chr14	7933870	A	G	+	0	0	0	1023	1	0.000976562	0	0	0	0	0	0	7933714	7933980	exon
Flnb	chr14	7933874	A	G	+	0	0	0	0	0	0	785	2	0.0025413	0	0	0	7933714	7933980	exon
Flnb	chr14	7933877	A	G	+	0	0	0	0	0	0	0	0	0	1206	1	0.0008285	7933714	7933980	exon
Flnb	chr14	7933880	A	G	+	0	0	0	0	0	0	0	0	0	1184	2	0.00168634	7933714	7933980	exon
Flnb	chr14	7933881	A	G	+	0	0	0	0	0	0	0	0	0	1175	1	0.00085034	7933714	7933980	exon
Flnb	chr14	7933964	A	G	+	1214	3	0.00246508	0	0	0	0	0	0	0	0	0	7933714	7933980	exon
Flnb	chr14	7933967	A	G	+	1188	1	0.000841043	0	0	0	0	0	0	0	0	0	7933714	7933980	exon
Flnb	chr14	7933970	A	G	+	0	0	0	1398	1	0.000714796	0	0	0	0	0	0	7933714	7933980	exon
Flnb	chr14	7933974	A	G	+	0	0	0	0	0	0	0	0	0	1572	1	0.000635728	7933714	7933980	exon
Flnb	chr14	7934375	A	G	+	0	0	0	33	1	0.0294118	0	0	0	0	0	0	7933980	7934564	intron
Flnb	chr14	7934483	A	G	+	44	1	0.0222222	0	0	0	0	0	0	0	0	0	7933980	7934564	intron
Flnb	chr14	7934562	A	G	+	0	0	0	54	1	0.0181818	0	0	0	0	0	0	7933980	7934564	intron
Flnb	chr14	7934567	A	G	+	0	0	0	0	0	0	0	0	0	1440	1	0.000693963	7934564	7934701	exon
Flnb	chr14	7934581	A	G	+	0	0	0	0	0	0	0	0	0	1311	1	0.000762195	7934564	7934701	exon
Flnb	chr14	7934621	A	G	+	0	0	0	1183	1	0.000844595	0	0	0	0	0	0	7934564	7934701	exon
Flnb	chr14	7934629	A	G	+	0	0	0	0	0	0	889	1	0.0011236	1434	1	0.000696864	7934564	7934701	exon
Flnb	chr14	7934632	A	G	+	969	2	0.00205973	0	0	0	0	0	0	0	0	0	7934564	7934701	exon
Flnb	chr14	7934633	A	G	+	0	0	0	1243	1	0.000803859	0	0	0	0	0	0	7934564	7934701	exon
Flnb	chr14	7934639	A	G	+	0	0	0	0	0	0	0	0	0	1475	1	0.000677507	7934564	7934701	exon
Flnb	chr14	7934644	A	G	+	0	0	0	0	0	0	0	0	0	1409	1	0.00070922	7934564	7934701	exon
Flnb	chr14	7934686	A	G	+	0	0	0	0	0	0	1293	1	0.000772798	0	0	0	7934564	7934701	exon
Flnb	chr14	7935290	A	G	+	29	1	0.0333333	0	0	0	0	0	0	0	0	0	7934701	7935934	intron
Flnb	chr14	7935452	A	G	+	0	0	0	25	1	0.0384615	0	0	0	0	0	0	7934701	7935934	intron
Flnb	chr14	7935515	A	G	+	0	0	0	0	0	0	39	1	0.025	0	0	0	7934701	7935934	intron
Flnb	chr14	7935610	A	G	+	66	1	0.0149254	0	0	0	0	0	0	0	0	0	7934701	7935934	intron
Flnb	chr14	7935908	A	G	+	0	0	0	56	1	0.0175439	0	0	0	0	0	0	7934701	7935934	intron
Flnb	chr14	7935937	A	G	+	1418	1	0.000704722	0	0	0	0	0	0	0	0	0	7935934	7936049	exon
Flnb	chr14	7935954	A	G	+	1384	1	0.000722022	0	0	0	0	0	0	0	0	0	7935934	7936049	exon
Flnb	chr14	7935964	A	G	+	0	0	0	1778	1	0.000562114	0	0	0	2022	3	0.00148148	7935934	7936049	exon
Flnb	chr14	7935967	A	G	+	0	0	0	0	0	0	1300	1	0.00076864	0	0	0	7935934	7936049	exon
Flnb	chr14	7935981	A	G	+	1049	1	0.000952381	0	0	0	0	0	0	0	0	0	7935934	7936049	exon
Flnb	chr14	7935988	A	G	+	0	0	0	0	0	0	0	0	0	1332	2	0.00149925	7935934	7936049	exon
Flnb	chr14	7936018	A	G	+	0	0	0	1083	1	0.000922509	0	0	0	0	0	0	7935934	7936049	exon
Flnb	chr14	7936041	A	G	+	827	11	0.0131265	1112	29	0.0254163	0	0	0	1339	4	0.00297841	7935934	7936049	exon
Flnb	chr14	7936053	A	G	+	144	1	0.00689655	89	2	0.021978	0	0	0	85	2	0.0229885	7936049	7939047	intron
Flnb	chr14	7936060	A	G	+	128	14	0.0985915	86	8	0.0851064	84	8	0.0869565	83	5	0.0568182	7936049	7939047	intron
Flnb	chr14	7936064	A	G	+	136	1	0.00729927	0	0	0	0	0	0	0	0	0	7936049	7939047	intron
Flnb	chr14	7936090	A	G	+	121	1	0.00819672	0	0	0	0	0	0	0	0	0	7936049	7939047	intron
Flnb	chr14	7936094	A	G	+	0	0	0	85	1	0.0116279	0	0	0	0	0	0	7936049	7939047	intron
Flnb	chr14	7936098	A	G	+	112	5	0.042735	86	3	0.0337079	84	1	0.0117647	0	0	0	7936049	7939047	intron
Flnb	chr14	7936108	A	G	+	0	0	0	83	1	0.0119048	0	0	0	0	0	0	7936049	7939047	intron
Flnb	chr14	7936202	A	G	+	0	0	0	0	0	0	85	1	0.0116279	0	0	0	7936049	7939047	intron
Flnb	chr14	7936325	A	G	+	101	1	0.00980392	0	0	0	0	0	0	0	0	0	7936049	7939047	intron
Flnb	chr14	7936345	A	G	+	111	1	0.00892857	0	0	0	0	0	0	0	0	0	7936049	7939047	intron
Flnb	chr14	7936349	A	G	+	0	0	0	0	0	0	0	0	0	73	1	0.0135135	7936049	7939047	intron
Flnb	chr14	7936506	A	G	+	0	0	0	88	1	0.011236	0	0	0	0	0	0	7936049	7939047	intron
Flnb	chr14	7936777	A	G	+	134	1	0.00740741	0	0	0	0	0	0	0	0	0	7936049	7939047	intron
Flnb	chr14	7936823	A	G	+	0	0	0	123	1	0.00806452	0	0	0	116	1	0.00854701	7936049	7939047	intron
Flnb	chr14	7937078	A	G	+	0	0	0	0	0	0	78	1	0.0126582	0	0	0	7936049	7939047	intron
Flnb	chr14	7937085	A	G	+	93	6	0.0606061	92	8	0.08	0	0	0	74	3	0.038961	7936049	7939047	intron
Flnb	chr14	7937087	A	G	+	94	1	0.0105263	0	0	0	72	2	0.027027	0	0	0	7936049	7939047	intron
Flnb	chr14	7937095	A	G	+	89	6	0.0631579	90	3	0.0322581	66	2	0.0294118	65	1	0.0151515	7936049	7939047	intron
Flnb	chr14	7937112	A	G	+	57	24	0.296296	55	28	0.337349	46	9	0.163636	54	13	0.19403	7936049	7939047	intron
Flnb	chr14	7937136	A	G	+	39	75	0.657895	17	82	0.828283	17	47	0.734375	23	54	0.701299	7936049	7939047	intron
Flnb	chr14	7937137	A	G	+	84	30	0.263158	70	29	0.292929	45	19	0.296875	60	18	0.230769	7936049	7939047	intron
Flnb	chr14	7937138	A	G	+	113	3	0.0258621	94	7	0.0693069	56	5	0.0819672	75	3	0.0384615	7936049	7939047	intron
Flnb	chr14	7937150	A	G	+	115	1	0.00862069	99	1	0.01	0	0	0	0	0	0	7936049	7939047	intron
Flnb	chr14	7937178	A	G	+	91	18	0.165138	62	15	0.194805	58	2	0.0333333	58	13	0.183099	7936049	7939047	intron
Flnb	chr14	7937179	A	G	+	108	3	0.027027	77	2	0.0253165	0	0	0	72	2	0.027027	7936049	7939047	intron
Flnb	chr14	7937180	A	G	+	110	3	0.0265487	0	0	0	60	1	0.0163934	0	0	0	7936049	7939047	intron
Flnb	chr14	7937185	A	G	+	111	1	0.00892857	0	0	0	0	0	0	72	1	0.0136986	7936049	7939047	intron
Flnb	chr14	7937187	A	G	+	0	0	0	69	2	0.028169	0	0	0	0	0	0	7936049	7939047	intron
Flnb	chr14	7937268	A	G	+	0	0	0	0	0	0	0	0	0	68	1	0.0144928	7936049	7939047	intron
Flnb	chr14	7937298	A	G	+	0	0	0	73	2	0.0266667	0	0	0	0	0	0	7936049	7939047	intron
Flnb	chr14	7937710	A	G	+	68	1	0.0144928	0	0	0	0	0	0	0	0	0	7936049	7939047	intron
Flnb	chr14	7937800	A	G	+	44	1	0.0222222	0	0	0	0	0	0	0	0	0	7936049	7939047	intron
Flnb	chr14	7937989	A	G	+	68	1	0.0144928	0	0	0	0	0	0	0	0	0	7936049	7939047	intron
Flnb	chr14	7938192	A	G	+	111	1	0.00892857	0	0	0	0	0	0	0	0	0	7936049	7939047	intron
Flnb	chr14	7938258	A	G	+	0	0	0	0	0	0	0	0	0	76	1	0.012987	7936049	7939047	intron
Flnb	chr14	7938308	A	G	+	0	0	0	72	1	0.0136986	0	0	0	0	0	0	7936049	7939047	intron
Flnb	chr14	7938405	A	G	+	75	1	0.0131579	0	0	0	0	0	0	0	0	0	7936049	7939047	intron
Flnb	chr14	7938451	A	G	+	65	1	0.0151515	0	0	0	0	0	0	0	0	0	7936049	7939047	intron
Flnb	chr14	7938479	A	G	+	0	0	0	0	0	0	43	1	0.0227273	0	0	0	7936049	7939047	intron
Flnb	chr14	7938516	A	G	+	62	1	0.015873	0	0	0	0	0	0	0	0	0	7936049	7939047	intron
Flnb	chr14	7938710	A	G	+	0	0	0	0	0	0	0	0	0	76	1	0.012987	7936049	7939047	intron
Flnb	chr14	7938716	A	G	+	0	0	0	0	0	0	70	1	0.0140845	0	0	0	7936049	7939047	intron
Flnb	chr14	7938723	A	G	+	0	0	0	65	1	0.0151515	0	0	0	0	0	0	7936049	7939047	intron
Flnb	chr14	7938851	A	G	+	0	0	0	0	0	0	0	0	0	91	1	0.0108696	7936049	7939047	intron
Flnb	chr14	7938857	A	G	+	0	79	1	0	76	1	0	53	1	0	63	1	7936049	7939047	intron
Flnb	chr14	7938919	A	G	+	0	0	0	0	0	0	87	1	0.0113636	104	1	0.00952381	7936049	7939047	intron
Flnb	chr14	7939045	A	G	+	147	2	0.0134228	125	1	0.00793651	110	1	0.00900901	115	2	0.017094	7936049	7939047	intron
Flnb	chr14	7939049	A	G	+	0	0	0	1127	2	0.00177148	0	0	0	0	0	0	7939047	7939179	exon
Flnb	chr14	7939052	A	G	+	0	0	0	0	0	0	0	0	0	1462	1	0.000683527	7939047	7939179	exon
Flnb	chr14	7939088	A	G	+	0	0	0	0	0	0	0	0	0	1475	1	0.000677507	7939047	7939179	exon
Flnb	chr14	7939104	A	G	+	1068	3	0.00280112	0	0	0	0	0	0	1758	1	0.000568505	7939047	7939179	exon
Flnb	chr14	7939105	A	G	+	0	0	0	0	0	0	963	1	0.00103734	0	0	0	7939047	7939179	exon
Flnb	chr14	7939110	A	G	+	0	0	0	0	0	0	1078	1	0.000926784	0	0	0	7939047	7939179	exon
Flnb	chr14	7939111	A	G	+	0	0	0	0	0	0	1027	1	0.000972763	0	0	0	7939047	7939179	exon
Flnb	chr14	7939129	A	G	+	0	0	0	0	0	0	0	0	0	1869	1	0.000534759	7939047	7939179	exon
Flnb	chr14	7939139	A	G	+	0	0	0	0	0	0	1027	1	0.000972763	1801	2	0.00110926	7939047	7939179	exon
Flnb	chr14	7939153	A	G	+	1258	1	0.000794281	0	0	0	0	0	0	0	0	0	7939047	7939179	exon
Flnb	chr14	7939174	A	G	+	0	0	0	0	0	0	1320	1	0.000757002	0	0	0	7939047	7939179	exon
Flnb	chr14	7939778	A	G	+	0	0	0	0	0	0	0	0	0	22	1	0.0434783	7939179	7942045	intron
Flnb	chr14	7939890	A	G	+	0	0	0	13	1	0.0714286	0	0	0	0	0	0	7939179	7942045	intron
Flnb	chr14	7939903	A	G	+	0	0	0	11	1	0.0833333	0	0	0	0	0	0	7939179	7942045	intron
Flnb	chr14	7939943	A	G	+	25	1	0.0384615	0	0	0	0	0	0	0	0	0	7939179	7942045	intron
Flnb	chr14	7940168	A	G	+	0	0	0	0	0	0	16	1	0.0588235	0	0	0	7939179	7942045	intron
Flnb	chr14	7940172	A	G	+	0	0	0	21	1	0.0454545	0	0	0	0	0	0	7939179	7942045	intron
Flnb	chr14	7940255	A	G	+	0	0	0	0	0	0	0	0	0	19	1	0.05	7939179	7942045	intron
Flnb	chr14	7940367	A	G	+	0	0	0	18	1	0.0526316	0	0	0	0	0	0	7939179	7942045	intron
Flnb	chr14	7940445	A	G	+	34	1	0.0285714	0	0	0	0	0	0	0	0	0	7939179	7942045	intron
Flnb	chr14	7940970	A	G	+	42	1	0.0232558	0	0	0	0	0	0	0	0	0	7939179	7942045	intron
Flnb	chr14	7941657	A	G	+	0	0	0	13	1	0.0714286	0	0	0	0	0	0	7939179	7942045	intron
Flnb	chr14	7942047	A	G	+	0	0	0	1719	1	0.000581395	0	0	0	0	0	0	7942045	7942221	exon
Flnb	chr14	7942051	A	G	+	0	0	0	0	0	0	1200	2	0.00166389	0	0	0	7942045	7942221	exon
Flnb	chr14	7942072	A	G	+	1059	1	0.000943396	0	0	0	0	0	0	1653	1	0.000604595	7942045	7942221	exon
Flnb	chr14	7942075	A	G	+	0	0	0	0	0	0	964	1	0.00103627	0	0	0	7942045	7942221	exon
Flnb	chr14	7942101	A	G	+	0	0	0	1284	1	0.00077821	0	0	0	0	0	0	7942045	7942221	exon
Flnb	chr14	7942108	A	G	+	0	0	0	1288	1	0.000775795	0	0	0	0	0	0	7942045	7942221	exon
Flnb	chr14	7942113	A	G	+	0	0	0	1288	1	0.000775795	0	0	0	0	0	0	7942045	7942221	exon
Flnb	chr14	7942117	A	G	+	0	0	0	0	0	0	0	0	0	1389	1	0.000719424	7942045	7942221	exon
Flnb	chr14	7942151	A	G	+	0	0	0	1069	1	0.000934579	0	0	0	1336	2	0.00149477	7942045	7942221	exon
Flnb	chr14	7942166	A	G	+	0	0	0	0	0	0	0	0	0	2014	2	0.000992063	7942045	7942221	exon
Flnb	chr14	7942181	A	G	+	0	0	0	1718	1	0.000581734	0	0	0	0	0	0	7942045	7942221	exon
Flnb	chr14	7942209	A	G	+	0	0	0	0	0	0	0	0	0	2157	1	0.000463392	7942045	7942221	exon
Flnb	chr14	7942215	A	G	+	1283	1	0.000778816	0	0	0	0	0	0	1975	1	0.000506073	7942045	7942221	exon
Flnb	chr14	7942856	A	G	+	0	0	0	0	0	0	0	0	0	23	1	0.0416667	7942221	7945795	intron
Flnb	chr14	7942933	A	G	+	0	0	0	0	0	0	0	0	0	23	1	0.0416667	7942221	7945795	intron
Flnb	chr14	7944581	A	G	+	18	1	0.0526316	0	0	0	0	0	0	0	0	0	7942221	7945795	intron
Flnb	chr14	7945274	A	G	+	0	0	0	0	0	0	20	1	0.047619	0	0	0	7942221	7945795	intron
Flnb	chr14	7945453	A	G	+	0	0	0	0	0	0	21	1	0.0454545	0	0	0	7942221	7945795	intron
Flnb	chr14	7945808	A	G	+	0	0	0	0	0	0	0	0	0	1783	1	0.000560538	7945795	7946013	exon
Flnb	chr14	7945815	A	G	+	0	0	0	1443	1	0.000692521	0	0	0	0	0	0	7945795	7946013	exon
Flnb	chr14	7945824	A	G	+	0	0	0	0	0	0	0	0	0	1617	1	0.000618047	7945795	7946013	exon
Flnb	chr14	7945828	A	G	+	986	2	0.00202429	0	0	0	875	1	0.00114155	0	0	0	7945795	7946013	exon
Flnb	chr14	7945832	A	G	+	0	0	0	1118	4	0.00356506	0	0	0	0	0	0	7945795	7946013	exon
Flnb	chr14	7945838	A	G	+	726	1	0.00137552	0	0	0	661	5	0.00750751	0	0	0	7945795	7946013	exon
Flnb	chr14	7945844	A	G	+	0	0	0	0	0	0	0	0	0	849	1	0.00117647	7945795	7946013	exon
Flnb	chr14	7945885	A	G	+	0	0	0	991	1	0.00100806	0	0	0	0	0	0	7945795	7946013	exon
Flnb	chr14	7945891	A	G	+	833	1	0.00119904	0	0	0	0	0	0	0	0	0	7945795	7946013	exon
Flnb	chr14	7945896	A	G	+	0	0	0	0	0	0	0	0	0	1397	1	0.000715308	7945795	7946013	exon
Flnb	chr14	7945901	A	G	+	0	0	0	0	0	0	824	1	0.00121212	0	0	0	7945795	7946013	exon
Flnb	chr14	7945903	A	G	+	884	1	0.00112994	0	0	0	0	0	0	0	0	0	7945795	7946013	exon
Flnb	chr14	7945913	A	G	+	875	1	0.00114155	0	0	0	0	0	0	0	0	0	7945795	7946013	exon
Flnb	chr14	7945959	A	G	+	1078	1	0.000926784	0	0	0	0	0	0	0	0	0	7945795	7946013	exon
Flnb	chr14	7945975	A	G	+	0	0	0	0	0	0	0	0	0	1413	1	0.000707214	7945795	7946013	exon
Flnb	chr14	7945980	A	G	+	0	0	0	0	0	0	0	0	0	1474	1	0.000677966	7945795	7946013	exon
Flnb	chr14	7945998	A	G	+	0	0	0	1181	1	0.000846024	0	0	0	0	0	0	7945795	7946013	exon
Flnb	chr14	7947032	A	G	+	0	0	0	13	1	0.0714286	0	0	0	0	0	0	7946013	7948444	intron
Flnb	chr14	7947927	A	G	+	7	1	0.125	0	0	0	0	0	0	0	0	0	7946013	7948444	intron
Flnb	chr14	7947942	A	G	+	0	0	0	0	0	0	3	3	0.5	0	0	0	7946013	7948444	intron
Flnb	chr14	7948447	A	G	+	0	0	0	0	0	0	0	0	0	1525	1	0.000655308	7948444	7948647	exon
Flnb	chr14	7948463	A	G	+	0	0	0	1555	1	0.000642674	0	0	0	1862	2	0.00107296	7948444	7948647	exon
Flnb	chr14	7948474	A	G	+	1283	1	0.000778816	0	0	0	0	0	0	1907	1	0.000524109	7948444	7948647	exon
Flnb	chr14	7948498	A	G	+	1307	2	0.00152788	1622	1	0.000616143	0	0	0	0	0	0	7948444	7948647	exon
Flnb	chr14	7948509	A	G	+	0	0	0	0	0	0	1095	1	0.000912409	0	0	0	7948444	7948647	exon
Flnb	chr14	7948524	A	G	+	1062	1	0.000940734	0	0	0	0	0	0	0	0	0	7948444	7948647	exon
Flnb	chr14	7948563	A	G	+	838	1	0.0011919	0	0	0	0	0	0	0	0	0	7948444	7948647	exon
Flnb	chr14	7948568	A	G	+	0	0	0	0	0	0	638	1	0.00156495	0	0	0	7948444	7948647	exon
Flnb	chr14	7948579	A	G	+	0	0	0	968	1	0.00103199	0	0	0	0	0	0	7948444	7948647	exon
Flnb	chr14	7950311	A	G	+	0	0	0	0	0	0	1107	1	0.000902527	0	0	0	7950305	7950489	exon
Flnb	chr14	7950332	A	G	+	1120	1	0.000892061	0	0	0	0	0	0	1528	1	0.000654022	7950305	7950489	exon
Flnb	chr14	7950340	A	G	+	0	0	0	0	0	0	1158	1	0.000862813	1661	1	0.000601685	7950305	7950489	exon
Flnb	chr14	7950343	A	G	+	0	0	0	1509	1	0.000662252	0	0	0	0	0	0	7950305	7950489	exon
Flnb	chr14	7950368	A	G	+	0	0	0	0	0	0	1117	2	0.00178731	0	0	0	7950305	7950489	exon
Flnb	chr14	7950380	A	G	+	0	0	0	0	0	0	0	0	0	1613	1	0.000619579	7950305	7950489	exon
Flnb	chr14	7950386	A	G	+	0	0	0	0	0	0	1050	1	0.000951475	0	0	0	7950305	7950489	exon
Flnb	chr14	7950391	A	G	+	0	0	0	0	0	0	0	0	0	1734	1	0.000576369	7950305	7950489	exon
Flnb	chr14	7950392	A	G	+	0	0	0	1459	1	0.000684932	0	0	0	0	0	0	7950305	7950489	exon
Flnb	chr14	7950413	A	G	+	0	0	0	0	0	0	0	0	0	1691	1	0.000591017	7950305	7950489	exon
Flnb	chr14	7950415	A	G	+	1147	1	0.00087108	0	0	0	0	0	0	1710	1	0.000584454	7950305	7950489	exon
Flnb	chr14	7950439	A	G	+	0	0	0	0	0	0	0	0	0	1761	1	0.000567537	7950305	7950489	exon
Flnb	chr14	7950440	A	G	+	0	0	0	0	0	0	1032	1	0.000968054	0	0	0	7950305	7950489	exon
Flnb	chr14	7950450	A	G	+	0	0	0	1590	1	0.000628536	0	0	0	0	0	0	7950305	7950489	exon
Flnb	chr14	7950481	A	G	+	0	0	0	1549	1	0.000645161	0	0	0	0	0	0	7950305	7950489	exon
Flnb	chr14	7950544	A	G	+	1039	1	0.000961538	0	0	0	815	1	0.00122549	0	0	0	7950489	7951587	3 UTR
Flnb	chr14	7950566	A	G	+	0	0	0	0	0	0	909	1	0.0010989	0	0	0	7950489	7951587	3 UTR
Flnb	chr14	7950574	A	G	+	0	0	0	1521	1	0.00065703	0	0	0	0	0	0	7950489	7951587	3 UTR
Flnb	chr14	7950590	A	G	+	0	0	0	0	0	0	920	1	0.00108578	0	0	0	7950489	7951587	3 UTR
Flnb	chr14	7950604	A	G	+	0	0	0	0	0	0	932	1	0.00107181	0	0	0	7950489	7951587	3 UTR
Flnb	chr14	7950624	A	G	+	0	0	0	0	0	0	774	2	0.00257732	0	0	0	7950489	7951587	3 UTR
Flnb	chr14	7950647	A	G	+	0	0	0	1092	2	0.00182815	0	0	0	0	0	0	7950489	7951587	3 UTR
Flnb	chr14	7950719	A	G	+	0	0	0	1342	1	0.000744602	0	0	0	0	0	0	7950489	7951587	3 UTR
Flnb	chr14	7950728	A	G	+	1026	1	0.00097371	0	0	0	0	0	0	0	0	0	7950489	7951587	3 UTR
Flnb	chr14	7950736	A	G	+	0	0	0	1358	1	0.000735835	0	0	0	0	0	0	7950489	7951587	3 UTR
Flnb	chr14	7950746	A	G	+	0	0	0	0	0	0	915	1	0.0010917	0	0	0	7950489	7951587	3 UTR
Flnb	chr14	7950748	A	G	+	0	0	0	0	0	0	914	1	0.0010929	0	0	0	7950489	7951587	3 UTR
Flnb	chr14	7950752	A	G	+	0	0	0	1378	1	0.000725163	0	0	0	0	0	0	7950489	7951587	3 UTR
Flnb	chr14	7950765	A	G	+	0	0	0	0	0	0	873	1	0.00114416	0	0	0	7950489	7951587	3 UTR
Flnb	chr14	7950770	A	G	+	0	0	0	0	0	0	903	1	0.00110619	0	0	0	7950489	7951587	3 UTR
Flnb	chr14	7950774	A	G	+	0	0	0	1475	1	0.000677507	0	0	0	0	0	0	7950489	7951587	3 UTR
Flnb	chr14	7950803	A	G	+	1137	2	0.00175593	0	0	0	0	0	0	0	0	0	7950489	7951587	3 UTR
Flnb	chr14	7950804	A	G	+	0	0	0	0	0	0	0	0	0	1838	1	0.000543774	7950489	7951587	3 UTR
Flnb	chr14	7950811	A	G	+	0	0	0	0	0	0	0	0	0	1635	1	0.000611247	7950489	7951587	3 UTR
Flnb	chr14	7950816	A	G	+	0	0	0	0	0	0	1079	1	0.000925926	0	0	0	7950489	7951587	3 UTR
Flnb	chr14	7950832	A	G	+	0	0	0	0	0	0	0	0	0	1879	1	0.000531915	7950489	7951587	3 UTR
Flnb	chr14	7950834	A	G	+	1189	1	0.000840336	0	0	0	0	0	0	0	0	0	7950489	7951587	3 UTR
Flnb	chr14	7950866	A	G	+	0	0	0	0	0	0	1140	2	0.00175131	0	0	0	7950489	7951587	3 UTR
Flnb	chr14	7950876	A	G	+	0	0	0	0	0	0	981	1	0.00101833	0	0	0	7950489	7951587	3 UTR
Flnb	chr14	7950885	A	G	+	0	0	0	1510	1	0.000661813	0	0	0	0	0	0	7950489	7951587	3 UTR
Flnb	chr14	7950886	A	G	+	0	0	0	0	0	0	0	0	0	1774	2	0.00112613	7950489	7951587	3 UTR
Flnb	chr14	7950895	A	G	+	0	0	0	0	0	0	1039	2	0.00192123	0	0	0	7950489	7951587	3 UTR
Flnb	chr14	7950905	A	G	+	0	0	0	1506	1	0.00066357	0	0	0	0	0	0	7950489	7951587	3 UTR
Flnb	chr14	7950906	A	G	+	0	0	0	1435	1	0.000696379	0	0	0	0	0	0	7950489	7951587	3 UTR
Flnb	chr14	7950907	A	G	+	0	0	0	0	0	0	1027	1	0.000972763	0	0	0	7950489	7951587	3 UTR
Flnb	chr14	7950919	A	G	+	0	0	0	0	0	0	0	0	0	1550	1	0.000644745	7950489	7951587	3 UTR
Flnb	chr14	7950924	A	G	+	996	1	0.00100301	0	0	0	0	0	0	0	0	0	7950489	7951587	3 UTR
Flnb	chr14	7950976	A	G	+	0	0	0	0	0	0	0	0	0	1496	1	0.000668003	7950489	7951587	3 UTR
Flnb	chr14	7950977	A	G	+	0	0	0	0	0	0	952	2	0.00209644	0	0	0	7950489	7951587	3 UTR
Flnb	chr14	7950981	A	G	+	0	0	0	0	0	0	901	1	0.00110865	0	0	0	7950489	7951587	3 UTR
Flnb	chr14	7950994	A	G	+	0	0	0	0	0	0	0	0	0	1101	1	0.000907441	7950489	7951587	3 UTR
Flnb	chr14	7950999	A	G	+	0	0	0	976	1	0.00102354	0	0	0	0	0	0	7950489	7951587	3 UTR
Flnb	chr14	7951003	A	G	+	0	0	0	0	0	0	0	0	0	1197	1	0.000834725	7950489	7951587	3 UTR
Flnb	chr14	7951005	A	G	+	801	1	0.00124688	0	0	0	0	0	0	1236	1	0.000808407	7950489	7951587	3 UTR
Flnb	chr14	7951020	A	G	+	0	0	0	0	0	0	0	0	0	1298	1	0.000769823	7950489	7951587	3 UTR
Flnb	chr14	7951028	A	G	+	886	1	0.0011274	0	0	0	0	0	0	0	0	0	7950489	7951587	3 UTR
Flnb	chr14	7951036	A	G	+	0	0	0	0	0	0	0	0	0	1448	1	0.000690131	7950489	7951587	3 UTR
Flnb	chr14	7951052	A	G	+	0	0	0	0	0	0	792	1	0.00126103	0	0	0	7950489	7951587	3 UTR
Flnb	chr14	7951056	A	G	+	0	0	0	0	0	0	0	0	0	1360	1	0.000734754	7950489	7951587	3 UTR
Flnb	chr14	7951066	A	G	+	0	0	0	0	0	0	836	1	0.00119474	0	0	0	7950489	7951587	3 UTR
Flnb	chr14	7951070	A	G	+	0	0	0	1363	1	0.000733138	0	0	0	0	0	0	7950489	7951587	3 UTR
Flnb	chr14	7951078	A	G	+	0	0	0	1341	2	0.0014892	889	1	0.0011236	1533	2	0.00130293	7950489	7951587	3 UTR
Flnb	chr14	7951102	A	G	+	0	0	0	0	0	0	0	0	0	1329	2	0.00150263	7950489	7951587	3 UTR
Flnb	chr14	7951112	A	G	+	808	1	0.00123609	0	0	0	0	0	0	0	0	0	7950489	7951587	3 UTR
Flnb	chr14	7951114	A	G	+	0	0	0	1088	1	0.000918274	0	0	0	0	0	0	7950489	7951587	3 UTR
Flnb	chr14	7951145	A	G	+	0	0	0	0	0	0	0	0	0	1274	1	0.000784314	7950489	7951587	3 UTR
Flnb	chr14	7951161	A	G	+	0	0	0	0	0	0	806	1	0.00123916	0	0	0	7950489	7951587	3 UTR
Flnb	chr14	7951164	A	G	+	0	0	0	0	0	0	0	0	0	1181	1	0.000846024	7950489	7951587	3 UTR
Flnb	chr14	7951206	A	G	+	0	0	0	0	0	0	685	1	0.00145773	0	0	0	7950489	7951587	3 UTR
Flnb	chr14	7951209	A	G	+	734	1	0.00136054	0	0	0	0	0	0	0	0	0	7950489	7951587	3 UTR
Flnb	chr14	7951218	A	G	+	913	1	0.00109409	0	0	0	0	0	0	0	0	0	7950489	7951587	3 UTR
Flnb	chr14	7951232	A	G	+	0	0	0	1186	1	0.00084246	927	2	0.00215285	0	0	0	7950489	7951587	3 UTR
Flnb	chr14	7951237	A	G	+	935	1	0.00106838	0	0	0	0	0	0	0	0	0	7950489	7951587	3 UTR
Flnb	chr14	7951268	A	G	+	0	0	0	0	0	0	0	0	0	1090	1	0.00091659	7950489	7951587	3 UTR
Flnb	chr14	7951308	A	G	+	0	0	0	899	1	0.00111111	0	0	0	0	0	0	7950489	7951587	3 UTR
Flnb	chr14	7951389	A	G	+	0	0	0	0	0	0	0	0	0	4623	1	0.000216263	7950489	7951587	3 UTR
Flnb	chr14	7951405	A	G	+	0	0	0	4684	1	0.000213447	3175	2	0.000629525	5464	1	0.000182983	7950489	7951587	3 UTR
Flnb	chr14	7951419	A	G	+	0	0	0	0	0	0	0	0	0	5944	1	0.000168209	7950489	7951587	3 UTR
Flnb	chr14	7951422	A	G	+	0	0	0	0	0	0	0	0	0	5975	1	0.000167336	7950489	7951587	3 UTR
Flnb	chr14	7951423	A	G	+	3775	1	0.000264831	5182	2	0.000385802	0	0	0	6000	2	0.000333222	7950489	7951587	3 UTR
Flnb	chr14	7951427	A	G	+	0	0	0	5189	2	0.000385282	0	0	0	6013	2	0.000332502	7950489	7951587	3 UTR
Flnb	chr14	7951429	A	G	+	0	0	0	5204	1	0.000192123	0	0	0	6030	1	0.00016581	7950489	7951587	3 UTR
Flnb	chr14	7951432	A	G	+	0	0	0	5226	1	0.000191314	0	0	0	6035	2	0.00033129	7950489	7951587	3 UTR
Flnb	chr14	7951438	A	G	+	0	0	0	0	0	0	3565	2	0.000560695	0	0	0	7950489	7951587	3 UTR
Flnb	chr14	7951440	A	G	+	0	0	0	5344	2	0.000374111	0	0	0	6182	1	0.000161734	7950489	7951587	3 UTR
Flnb	chr14	7951453	A	G	+	0	0	0	5382	1	0.00018577	0	0	0	0	0	0	7950489	7951587	3 UTR
Flnb	chr14	7951455	A	G	+	3965	1	0.000252143	5389	1	0.000185529	0	0	0	0	0	0	7950489	7951587	3 UTR
Flnb	chr14	7951456	A	G	+	0	0	0	0	0	0	3605	1	0.000277316	0	0	0	7950489	7951587	3 UTR
Flnb	chr14	7951460	A	G	+	0	0	0	5411	1	0.000184775	0	0	0	0	0	0	7950489	7951587	3 UTR
Flnb	chr14	7951470	A	G	+	0	0	0	5192	1	0.000192567	0	0	0	6003	1	0.000166556	7950489	7951587	3 UTR
Flnb	chr14	7951476	A	G	+	0	0	0	0	0	0	0	0	0	5829	1	0.000171527	7950489	7951587	3 UTR
Flnb	chr14	7951479	A	G	+	3386	1	0.000295247	0	0	0	0	0	0	0	0	0	7950489	7951587	3 UTR
Flnb	chr14	7951485	A	G	+	3895	1	0.000256674	5331	1	0.000187547	0	0	0	0	0	0	7950489	7951587	3 UTR
Flnb	chr14	7951497	A	G	+	0	0	0	5174	2	0.000386399	0	0	0	0	0	0	7950489	7951587	3 UTR
Flnb	chr14	7951504	A	G	+	3736	2	0.000535045	0	0	0	3432	1	0.00029129	0	0	0	7950489	7951587	3 UTR
Flnb	chr14	7951505	A	G	+	3734	1	0.000267738	0	0	0	0	0	0	0	0	0	7950489	7951587	3 UTR
Flnb	chr14	7951507	A	G	+	0	0	0	0	0	0	0	0	0	5834	1	0.00017138	7950489	7951587	3 UTR
Flnb	chr14	7951509	A	G	+	3708	1	0.000269614	5060	1	0.000197589	0	0	0	0	0	0	7950489	7951587	3 UTR
Flnb	chr14	7951511	A	G	+	0	0	0	0	0	0	3282	2	0.000609013	0	0	0	7950489	7951587	3 UTR
Flnb	chr14	7951515	A	G	+	0	0	0	4686	1	0.000213356	0	0	0	0	0	0	7950489	7951587	3 UTR
Flnb	chr14	7951521	A	G	+	0	0	0	4154	1	0.000240674	0	0	0	0	0	0	7950489	7951587	3 UTR
Flnb	chr14	7951531	A	G	+	0	0	0	0	0	0	2635	1	0.000379363	0	0	0	7950489	7951587	3 UTR
Flnb	chr14	7951558	A	G	+	1255	1	0.000796178	0	0	0	0	0	0	0	0	0	7950489	7951587	3 UTR
Flnb	chr14	7951572	A	G	+	0	0	0	0	0	0	1047	1	0.000954198	0	0	0	7950489	7951587	3 UTR
Myh3	chr11	67042218	A	G	+	0	0	0	3	1	0.25	0	0	0	0	0	0	67028300	67077300	5 distal
Myh3	chr11	67043429	A	G	+	0	0	0	0	0	0	0	0	0	1	1	0.5	67028300	67077300	5 distal
Myh3	chr11	67044304	A	G	+	0	0	0	6	1	0.142857	0	0	0	0	0	0	67028300	67077300	5 distal
Myh3	chr11	67045260	A	G	+	0	0	0	4	1	0.2	3	1	0.25	0	0	0	67028300	67077300	5 distal
Myh3	chr11	67045572	A	G	+	0	0	0	0	0	0	3	1	0.25	0	0	0	67028300	67077300	5 distal
Myh3	chr11	67047050	A	G	+	0	0	0	0	0	0	5	1	0.166667	0	0	0	67028300	67077300	5 distal
Myh3	chr11	67048516	A	G	+	5	1	0.166667	0	0	0	0	0	0	0	0	0	67028300	67077300	5 distal
Myh3	chr11	67049666	A	G	+	2	1	0.333333	0	0	0	0	0	0	0	0	0	67028300	67077300	5 distal
Myh2	chr11	67189041	A	G	+	0	0	0	0	0	0	0	0	0	0	1	1	67188922	67189067	exon
Myh2	chr11	67191412	A	G	+	0	0	0	0	1	1	0	0	0	0	0	0	67191348	67191466	exon
Myh1	chr11	67221582	A	G	+	0	0	0	0	0	0	0	0	0	0	1	1	67221513	67221683	exon
Myh1	chr11	67240148	A	G	+	0	0	0	0	0	0	0	1	1	0	0	0	67225575	67274575	3 distal
Myh1	chr11	67240155	A	G	+	0	0	0	0	0	0	0	1	1	0	0	0	67225575	67274575	3 distal
Myh8	chr11	67300724	A	G	+	0	1	1	0	2	1	0	2	1	0	5	1	67300151	67301401	intron
Myh8	chr11	67303887	A	G	+	0	0	0	0	1	1	0	0	0	0	0	0	67303618	67303926	exon
Myh13	chr11	67366535	A	G	+	0	0	0	0	0	0	0	0	0	2	1	0.333333	67365055	67367153	intron
Myh13	chr11	67366552	A	G	+	0	0	0	0	0	0	2	1	0.333333	0	0	0	67365055	67367153	intron
Myh13	chr11	67367340	A	G	+	0	0	0	0	0	0	0	0	0	2	1	0.333333	67367278	67367557	intron
Myh13	chr11	67368281	A	G	+	0	0	0	0	0	0	1	1	0.5	0	0	0	67367727	67369105	intron
Myh13	chr11	67369002	A	G	+	0	0	0	0	0	0	0	0	0	1	1	0.5	67367727	67369105	intron
Myh13	chr11	67369973	A	G	+	0	1	1	0	0	0	0	0	0	0	1	1	67369404	67370920	intron
Myh13	chr11	67374414	A	G	+	0	0	0	0	0	0	0	0	0	4	2	0.333333	67372502	67421502	3 distal
Myh13	chr11	67376242	A	G	+	0	0	0	0	0	0	0	0	0	2	1	0.333333	67372502	67421502	3 distal
Myh13	chr11	67380107	A	G	+	5	1	0.166667	0	0	0	0	0	0	0	0	0	67372502	67421502	3 distal
Myh13	chr11	67383240	A	G	+	0	0	0	0	1	1	0	0	0	0	0	0	67372502	67421502	3 distal
Myh13	chr11	67404745	A	G	+	0	0	0	0	0	0	0	0	0	0	1	1	67372502	67421502	3 distal
Myh13	chr11	67405827	A	G	+	0	0	0	0	1	1	0	0	0	0	0	0	67372502	67421502	3 distal
Myh13	chr11	67407599	A	G	+	0	0	0	0	0	0	0	1	1	0	0	0	67372502	67421502	3 distal
Myh13	chr11	67411212	A	G	+	0	0	0	0	0	0	0	1	1	0	0	0	67372502	67421502	3 distal
Myh10	chr11	68649284	A	G	+	0	0	0	0	1	1	0	0	0	0	0	0	68641915	68690915	5 distal
Myh10	chr11	68649285	A	G	+	0	0	0	0	1	1	0	0	0	0	0	0	68641915	68690915	5 distal
Myh10	chr11	68684811	A	G	+	0	0	0	1	1	0.5	0	0	0	0	0	0	68641915	68690915	5 distal
Myh10	chr11	68684812	A	G	+	0	0	0	1	1	0.5	0	0	0	0	0	0	68641915	68690915	5 distal
Myh10	chr11	68684814	A	G	+	0	0	0	1	1	0.5	0	0	0	0	0	0	68641915	68690915	5 distal
Myh10	chr11	68684828	A	G	+	0	0	0	1	1	0.5	0	0	0	0	0	0	68641915	68690915	5 distal
Myh10	chr11	68691839	A	G	+	0	0	0	0	0	0	0	0	0	0	1	1	68690915	68691915	promoter
Myh10	chr11	68699272	A	G	+	0	0	0	0	0	0	0	0	0	291	1	0.00342466	68699241	68699585	exon
Myh10	chr11	68699290	A	G	+	0	0	0	0	0	0	0	0	0	248	1	0.00401606	68699241	68699585	exon
Myh10	chr11	68699381	A	G	+	0	0	0	0	0	0	0	0	0	340	1	0.00293255	68699241	68699585	exon
Myh10	chr11	68699396	A	G	+	165	1	0.0060241	0	0	0	0	0	0	0	0	0	68699241	68699585	exon
Myh10	chr11	68699398	A	G	+	0	0	0	287	1	0.00347222	0	0	0	0	0	0	68699241	68699585	exon
Myh10	chr11	68699407	A	G	+	0	0	0	0	0	0	0	0	0	290	1	0.00343643	68699241	68699585	exon
Myh10	chr11	68699529	A	G	+	0	0	0	293	1	0.00340136	0	0	0	0	0	0	68699241	68699585	exon
Myh10	chr11	68699573	A	G	+	167	2	0.0118343	0	0	0	0	0	0	0	0	0	68699241	68699585	exon
Myh10	chr11	68720540	A	G	+	0	0	0	0	0	0	0	1	1	0	0	0	68699585	68721320	intron
Myh10	chr11	68721463	A	G	+	0	0	0	0	0	0	143	1	0.00694444	0	0	0	68721320	68721476	exon
Myh10	chr11	68731852	A	G	+	0	0	0	2	1	0.333333	0	0	0	3	1	0.25	68721476	68734388	intron
Myh10	chr11	68737120	A	G	+	0	0	0	2	1	0.333333	0	0	0	0	0	0	68734415	68745317	intron
Myh10	chr11	68738002	A	G	+	0	0	0	0	1	1	0	0	0	0	0	0	68734415	68745317	intron
Myh10	chr11	68743229	A	G	+	0	0	0	1	1	0.5	0	0	0	0	0	0	68734415	68745317	intron
Myh10	chr11	68745376	A	G	+	0	0	0	0	0	0	0	0	0	299	1	0.00333333	68745317	68745419	exon
Myh10	chr11	68746761	A	G	+	0	0	0	1	1	0.5	0	0	0	0	0	0	68745419	68751942	intron
Myh10	chr11	68751807	A	G	+	0	0	0	0	0	0	0	0	0	4	1	0.2	68745419	68751942	intron
Myh10	chr11	68751995	A	G	+	0	0	0	0	0	0	0	0	0	262	1	0.00380228	68751942	68752034	exon
Myh10	chr11	68754111	A	G	+	2	1	0.333333	0	0	0	0	0	0	0	0	0	68752034	68759746	intron
Myh10	chr11	68759783	A	G	+	0	0	0	178	1	0.00558659	0	0	0	163	1	0.00609756	68759746	68759809	exon
Myh10	chr11	68760689	A	G	+	0	0	0	0	0	0	0	0	0	150	1	0.00662252	68760653	68760751	exon
Myh10	chr11	68762091	A	G	+	0	0	0	0	0	0	4	1	0.2	0	0	0	68760751	68762511	intron
Myh10	chr11	68762614	A	G	+	0	0	0	0	0	0	0	0	0	150	1	0.00662252	68762511	68762654	exon
Myh10	chr11	68762932	A	G	+	0	0	0	0	0	0	150	1	0.00662252	0	0	0	68762838	68762933	exon
Myh10	chr11	68764343	A	G	+	0	0	0	0	0	0	0	0	0	188	1	0.00529101	68764236	68764354	exon
Myh10	chr11	68764346	A	G	+	0	0	0	0	0	0	0	0	0	205	1	0.00485437	68764236	68764354	exon
Myh10	chr11	68764348	A	G	+	0	0	0	0	0	0	0	0	0	212	1	0.00469484	68764236	68764354	exon
Myh10	chr11	68765052	A	G	+	0	0	0	0	0	0	0	0	0	206	2	0.00961538	68765041	68765193	exon
Myh10	chr11	68765114	A	G	+	0	0	0	181	1	0.00549451	0	0	0	0	0	0	68765041	68765193	exon
Myh10	chr11	68768230	A	G	+	176	1	0.00564972	0	0	0	0	0	0	0	0	0	68768199	68768372	exon
Myh10	chr11	68768232	A	G	+	0	0	0	0	0	0	151	1	0.00657895	0	0	0	68768199	68768372	exon
Myh10	chr11	68768260	A	G	+	0	0	0	215	1	0.00462963	0	0	0	0	0	0	68768199	68768372	exon
Myh10	chr11	68770508	A	G	+	0	0	0	4	1	0.2	0	0	0	0	0	0	68768372	68770884	intron
Myh10	chr11	68770979	A	G	+	0	0	0	0	0	0	119	1	0.00833333	0	0	0	68770884	68771057	exon
Myh10	chr11	68771017	A	G	+	178	1	0.00558659	0	0	0	0	0	0	0	0	0	68770884	68771057	exon
Myh10	chr11	68771020	A	G	+	0	0	0	0	0	0	0	0	0	280	1	0.00355872	68770884	68771057	exon
Myh10	chr11	68771022	A	G	+	0	0	0	0	0	0	162	1	0.00613497	0	0	0	68770884	68771057	exon
Myh10	chr11	68771055	A	G	+	0	0	0	209	1	0.0047619	0	0	0	0	0	0	68770884	68771057	exon
Myh10	chr11	68771945	A	G	+	0	0	0	164	1	0.00606061	0	0	0	155	2	0.0127389	68771872	68771986	exon
Myh10	chr11	68776477	A	G	+	0	0	0	0	0	0	1	1	0.5	0	0	0	68771986	68783106	intron
Myh10	chr11	68781533	A	G	+	0	0	0	0	0	0	7	1	0.125	0	0	0	68771986	68783106	intron
Myh10	chr11	68781844	A	G	+	0	0	0	1	1	0.5	0	0	0	0	0	0	68771986	68783106	intron
Myh10	chr11	68783181	A	G	+	0	0	0	0	0	0	0	0	0	300	1	0.00332226	68783106	68783299	exon
Myh10	chr11	68783217	A	G	+	0	0	0	274	1	0.00363636	0	0	0	0	0	0	68783106	68783299	exon
Myh10	chr11	68783256	A	G	+	0	0	0	261	1	0.00381679	0	0	0	0	0	0	68783106	68783299	exon
Myh10	chr11	68783462	A	G	+	0	0	0	0	0	0	128	1	0.00775194	217	1	0.00458716	68783383	68783504	exon
Myh10	chr11	68784980	A	G	+	0	0	0	0	0	0	152	2	0.012987	0	0	0	68784927	68784996	exon
Myh10	chr11	68785239	A	G	+	161	1	0.00617284	209	1	0.0047619	0	0	0	0	0	0	68785196	68785356	exon
Myh10	chr11	68785241	A	G	+	0	0	0	0	0	0	0	0	0	255	1	0.00390625	68785196	68785356	exon
Myh10	chr11	68785289	A	G	+	0	0	0	141	1	0.00704225	0	0	0	0	0	0	68785196	68785356	exon
Myh10	chr11	68785337	A	G	+	0	0	0	0	0	0	0	0	0	184	1	0.00540541	68785196	68785356	exon
Myh10	chr11	68785339	A	G	+	0	0	0	0	0	0	119	1	0.00833333	0	0	0	68785196	68785356	exon
Myh10	chr11	68785355	A	G	+	0	0	0	0	0	0	0	0	0	188	1	0.00529101	68785196	68785356	exon
Myh10	chr11	68785745	A	G	+	0	0	0	0	0	0	6	1	0.142857	0	0	0	68785726	68785825	intron
Myh10	chr11	68785856	A	G	+	0	0	0	0	0	0	0	0	0	143	1	0.00694444	68785825	68785956	exon
Myh10	chr11	68785868	A	G	+	0	0	0	0	0	0	75	1	0.0131579	0	0	0	68785825	68785956	exon
Myh10	chr11	68785892	A	G	+	0	0	0	0	0	0	87	1	0.0113636	0	0	0	68785825	68785956	exon
Myh10	chr11	68785925	A	G	+	0	0	0	136	1	0.00729927	96	1	0.0103093	0	0	0	68785825	68785956	exon
Myh10	chr11	68785997	A	G	+	0	0	0	0	0	0	2	1	0.333333	0	0	0	68785956	68787338	intron
Myh10	chr11	68787381	A	G	+	114	1	0.00869565	0	0	0	0	0	0	0	0	0	68787338	68787544	exon
Myh10	chr11	68787438	A	G	+	0	0	0	0	0	0	68	1	0.0144928	0	0	0	68787338	68787544	exon
Myh10	chr11	68787503	A	G	+	0	0	0	317	1	0.00314465	0	0	0	0	0	0	68787338	68787544	exon
Myh10	chr11	68790130	A	G	+	0	0	0	0	0	0	0	0	0	293	1	0.00340136	68790105	68790242	exon
Myh10	chr11	68790163	A	G	+	0	0	0	0	0	0	0	0	0	175	1	0.00568182	68790105	68790242	exon
Myh10	chr11	68790405	A	G	+	0	0	0	2	1	0.333333	0	0	0	0	0	0	68790242	68790617	intron
Myh10	chr11	68790633	A	G	+	237	1	0.00420168	334	1	0.00298507	0	0	0	0	0	0	68790617	68790740	exon
Myh10	chr11	68790681	A	G	+	222	1	0.0044843	0	0	0	148	1	0.00671141	320	1	0.00311526	68790617	68790740	exon
Myh10	chr11	68790698	A	G	+	0	0	0	0	0	0	0	0	0	274	1	0.00363636	68790617	68790740	exon
Myh10	chr11	68790722	A	G	+	0	0	0	0	0	0	0	0	0	327	1	0.00304878	68790617	68790740	exon
Myh10	chr11	68791122	A	G	+	0	0	0	4	1	0.2	0	0	0	0	0	0	68790740	68791863	intron
Myh10	chr11	68791315	A	G	+	0	0	0	0	0	0	4	1	0.2	0	0	0	68790740	68791863	intron
Myh10	chr11	68791863	A	G	+	0	0	0	0	0	0	0	0	0	311	1	0.00320513	68791863	68792034	exon
Myh10	chr11	68791878	A	G	+	0	0	0	0	0	0	0	0	0	309	1	0.00322581	68791863	68792034	exon
Myh10	chr11	68791884	A	G	+	201	1	0.0049505	0	0	0	0	0	0	0	0	0	68791863	68792034	exon
Myh10	chr11	68791886	A	G	+	0	0	0	0	0	0	0	0	0	295	1	0.00337838	68791863	68792034	exon
Myh10	chr11	68791891	A	G	+	0	0	0	0	0	0	144	1	0.00689655	0	0	0	68791863	68792034	exon
Myh10	chr11	68791904	A	G	+	210	1	0.00473934	0	0	0	0	0	0	0	0	0	68791863	68792034	exon
Myh10	chr11	68791917	A	G	+	0	0	0	0	0	0	130	1	0.00763359	0	0	0	68791863	68792034	exon
Myh10	chr11	68791947	A	G	+	0	0	0	0	0	0	0	0	0	352	1	0.00283286	68791863	68792034	exon
Myh10	chr11	68791959	A	G	+	0	0	0	0	0	0	0	0	0	365	1	0.00273224	68791863	68792034	exon
Myh10	chr11	68791971	A	G	+	0	0	0	0	0	0	114	2	0.0172414	0	0	0	68791863	68792034	exon
Myh10	chr11	68792007	A	G	+	233	2	0.00851064	0	0	0	123	1	0.00806452	0	0	0	68791863	68792034	exon
Myh10	chr11	68792010	A	G	+	0	0	0	0	0	0	0	0	0	334	1	0.00298507	68791863	68792034	exon
Myh10	chr11	68793069	A	G	+	0	0	0	255	2	0.0077821	0	0	0	0	0	0	68793056	68793268	exon
Myh10	chr11	68793071	A	G	+	0	0	0	248	1	0.00401606	0	0	0	0	0	0	68793056	68793268	exon
Myh10	chr11	68793112	A	G	+	0	0	0	0	0	0	0	0	0	296	1	0.003367	68793056	68793268	exon
Myh10	chr11	68793118	A	G	+	196	1	0.00507614	0	0	0	0	0	0	0	0	0	68793056	68793268	exon
Myh10	chr11	68793137	A	G	+	0	0	0	0	0	0	101	1	0.00980392	0	0	0	68793056	68793268	exon
Myh10	chr11	68793151	A	G	+	0	0	0	0	0	0	0	0	0	293	1	0.00340136	68793056	68793268	exon
Myh10	chr11	68793161	A	G	+	0	0	0	273	1	0.00364964	0	0	0	0	0	0	68793056	68793268	exon
Myh10	chr11	68795354	A	G	+	0	0	0	2	1	0.333333	0	0	0	0	0	0	68793268	68797332	intron
Myh10	chr11	68797245	A	G	+	0	0	0	0	0	0	0	0	0	4	1	0.2	68793268	68797332	intron
Myh10	chr11	68797409	A	G	+	0	0	0	191	2	0.0103627	0	0	0	237	1	0.00420168	68797332	68797476	exon
Myh10	chr11	68797419	A	G	+	0	0	0	0	0	0	0	0	0	204	1	0.00487805	68797332	68797476	exon
Myh10	chr11	68797423	A	G	+	0	0	0	177	1	0.00561798	0	0	0	197	1	0.00505051	68797332	68797476	exon
Myh10	chr11	68797427	A	G	+	124	1	0.008	0	0	0	0	0	0	0	0	0	68797332	68797476	exon
Myh10	chr11	68797474	A	G	+	0	0	0	0	0	0	114	1	0.00869565	0	0	0	68797332	68797476	exon
Myh10	chr11	68798026	A	G	+	6	1	0.142857	0	0	0	0	0	0	0	0	0	68797476	68798250	intron
Myh10	chr11	68798295	A	G	+	0	0	0	216	1	0.00460829	0	0	0	0	0	0	68798250	68798456	exon
Myh10	chr11	68798415	A	G	+	0	0	0	0	0	0	0	0	0	240	1	0.00414938	68798250	68798456	exon
Myh10	chr11	68798448	A	G	+	179	1	0.00555556	0	0	0	0	0	0	0	0	0	68798250	68798456	exon
Myh10	chr11	68800828	A	G	+	0	0	0	0	0	0	118	1	0.00840336	0	0	0	68800815	68800919	exon
Myh10	chr11	68800835	A	G	+	0	0	0	0	0	0	0	0	0	213	1	0.0046729	68800815	68800919	exon
Myh10	chr11	68800879	A	G	+	0	0	0	216	1	0.00460829	0	0	0	0	0	0	68800815	68800919	exon
Myh10	chr11	68800909	A	G	+	0	0	0	0	0	0	159	2	0.0124224	0	0	0	68800815	68800919	exon
Myh10	chr11	68801591	A	G	+	225	1	0.00442478	0	0	0	0	0	0	0	0	0	68801577	68801729	exon
Myh10	chr11	68801597	A	G	+	0	0	0	0	0	0	174	2	0.0113636	0	0	0	68801577	68801729	exon
Myh10	chr11	68801610	A	G	+	0	0	0	0	0	0	0	0	0	268	1	0.00371747	68801577	68801729	exon
Myh10	chr11	68801638	A	G	+	0	0	0	0	0	0	121	1	0.00819672	0	0	0	68801577	68801729	exon
Myh10	chr11	68801671	A	G	+	0	0	0	0	0	0	110	1	0.00900901	0	0	0	68801577	68801729	exon
Myh10	chr11	68801677	A	G	+	0	0	0	278	1	0.00358423	0	0	0	0	0	0	68801577	68801729	exon
Myh10	chr11	68801875	A	G	+	0	0	0	0	0	0	0	0	0	6	1	0.142857	68801729	68802108	intron
Myh10	chr11	68802133	A	G	+	0	0	0	0	0	0	0	0	0	431	1	0.00231481	68802108	68802356	exon
Myh10	chr11	68802187	A	G	+	0	0	0	0	0	0	0	0	0	285	1	0.0034965	68802108	68802356	exon
Myh10	chr11	68802196	A	G	+	0	0	0	267	1	0.00373134	129	2	0.0152672	0	0	0	68802108	68802356	exon
Myh10	chr11	68802272	A	G	+	220	1	0.00452489	0	0	0	0	0	0	0	0	0	68802108	68802356	exon
Myh10	chr11	68802856	A	G	+	200	1	0.00497512	0	0	0	0	0	0	0	0	0	68802840	68803052	exon
Myh10	chr11	68802880	A	G	+	0	0	0	220	1	0.00452489	0	0	0	0	0	0	68802840	68803052	exon
Myh10	chr11	68802889	A	G	+	182	1	0.00546448	0	0	0	0	0	0	0	0	0	68802840	68803052	exon
Myh10	chr11	68802904	A	G	+	160	1	0.00621118	0	0	0	0	0	0	0	0	0	68802840	68803052	exon
Myh10	chr11	68802982	A	G	+	0	0	0	0	0	0	0	0	0	252	1	0.00395257	68802840	68803052	exon
Myh10	chr11	68803015	A	G	+	0	0	0	209	1	0.0047619	0	0	0	0	0	0	68802840	68803052	exon
Myh10	chr11	68803073	A	G	+	0	0	0	0	0	0	0	0	0	8	1	0.111111	68803052	68804627	intron
Myh10	chr11	68804661	A	G	+	0	0	0	0	0	0	0	0	0	206	1	0.00483092	68804627	68804839	exon
Myh10	chr11	68804706	A	G	+	0	0	0	236	1	0.00421941	0	0	0	0	0	0	68804627	68804839	exon
Myh10	chr11	68804724	A	G	+	0	0	0	0	0	0	0	0	0	265	1	0.0037594	68804627	68804839	exon
Myh10	chr11	68804762	A	G	+	0	0	0	0	0	0	0	0	0	291	1	0.00342466	68804627	68804839	exon
Myh10	chr11	68804797	A	G	+	0	0	0	0	0	0	141	1	0.00704225	0	0	0	68804627	68804839	exon
[truncated: 1,213 more rows]
